42 [Abstract](#)

43 **Background:** Pulmonary Rehabilitation (PR) is one of the most cost-effective therapies  
44 for chronic obstructive pulmonary disease (COPD) management. There are, however,  
45 people who do not respond to PR and reasons for non-response are mostly unknown.  
46 PR is likely to change the airway microbiota and this could play a role in its  
47 responsiveness. In this study we have explored the association between PR  
48 effectiveness and specific alterations in oral microbiota and inflammation.

49 **Methods:** A prospective longitudinal study was conducted. Data on exercise capacity,  
50 dyspnoea, impact of disease and 418 saliva samples were collected from 76 patients,  
51 half of whom participated in a 12-weeks PR programme. Responders and non-  
52 responders to PR (dyspnoea, exercise-capacity and impact of disease) were defined  
53 based on minimal clinically important differences.

54 **Results:** Changes in microbiota, including *Prevotella melaninogenica* and *Streptococcus*  
55 were observed upon PR. *Prevotella*, previously found to be depleted in severe COPD,  
56 increased during the first month of PR in responders. This increase was negatively  
57 correlated with *Streptococcus* and *Lautropia*, known to be enriched in severe cases of  
58 COPD. Simultaneously, an anti-inflammatory commensal of the respiratory tract, *Rothia*,  
59 correlated strongly and negatively with several pro-inflammatory markers, whose levels  
60 were generally boosted by PR.

61 Conversely, in non-responders, the observed decline in *Prevotella* correlated negatively  
62 with *Streptococcus* and *Lautropia* whose fluctuations co-occurred with several pro-  
63 inflammatory markers.

64 **Conclusions:** PR is associated with changes in oral microbiota. Specifically, PR increases  
65 salivary *Prevotella melaninogenica* and avoids the decline in *Rothia* and the increase in  
66 *Streptococcus* and *Lautropia* in responders, which may contribute to the benefits of PR.

67 **Key words:** oral microbiota; inflammation; COPD; pulmonary rehabilitation;  
68 responsiveness

## 69 Introduction

70 Chronic obstructive pulmonary disease (COPD) is heterogenous and complex and  
71 therefore, difficult to treat and manage. Pulmonary rehabilitation (PR) is a grade A non-  
72 pharmacological therapy and one of the most cost-effective approaches for the  
73 management of COPD [1]. Compared to pharmacological treatment, PR is three to five  
74 times more effective in improving exercise capacity, dyspnoea, and quality of life [2].  
75 Response to PR is however multidimensional and heterogeneous, which means that for  
76 the same outcome patients are not equally responsive [3]. Reasons behind non-  
77 response are mostly unknown [3,4].

78 An association between the airway microbiota, including the oral microbiota [5], and  
79 disease severity has been extensively established in people with COPD [6–8]. However,  
80 the impact of PR on the airway microbiota has not yet been investigated, mainly because  
81 of the difficulty in collecting airway samples, such as sputum and bronchoalveolar lavage  
82 (BAL), routinely. Considering that only around 30% of people with COPD have productive  
83 cough [1], inducing sputum production becomes the only viable alternative.  
84 Unfortunately, this is challenging to collect outside the hospital context and requires  
85 both specialized personnel and equipment. The acquisition of BAL samples is even more  
86 challenging, as it is limited to hospital centres and bronchoscopy in patients with COPD  
87 carries a significantly higher risk of complications such as pneumonia, respiratory failure  
88 and desaturation compared with those with normal lung function [9]. In this scenario,  
89 saliva emerges as a viable non-invasive alternative to sampling the airway microbiota,  
90 which collection is simple and can be performed in different settings, namely at-home.  
91 Moreover, the oral and lower airway microbiotas are highly correlated [10], given the

92 topological continuity between the niches, implying oral bacteria as the major colonizers  
93 of the lungs through aspiration [10–12].

94 An additional reason to choose saliva to evaluate the effect of PR in the airway  
95 microbiota, is the role of oral bacteria in nitrate metabolism. Exercise training, one of  
96 the main components of PR, stimulates the synthesis of nitric oxide by the human body,  
97 which is a key regulator of skeletal muscle blood flow, contractility, and mitochondrial  
98 function [13]. Oral microbiota has been strongly implicated in exercise performance,  
99 mainly due to its essential role in nitrate-nitrite-nitric oxide pathway [14,15], with recent  
100 studies showing nitrate oral supplementation to enhance PR effectiveness [16]. The oral  
101 microbiota although acknowledged as essential for this positive effect, was never  
102 studied.

103 On the other hand, microbiota modifications are frequently connected with an  
104 inflammatory response, which is well known to be modulated by exercise [17] and  
105 affected by PR, although with inconsistent results [18–20].

106 Here, we have explored the association between PR and changes in oral microbiota and  
107 inflammatory markers of people with COPD to propose that PR effectiveness could be  
108 related, at least partially, with bacterial-driven immune regulation.

## 109 Methods

110 A prospective longitudinal cohort study was conducted. Ethical approvals were obtained  
111 from Administração Regional de Saúde Centro (64/2016), Centro Hospitalar do Baixo  
112 Vouga (including Estarreja's Hospital; 08-03-17) and Agrupamento dos Centros de Saúde  
113 do Baixo Vouga. Written informed consent was obtained from all participants.

114 The study was reported following the "Strengthening the Reporting of Observational  
115 Studies in Epidemiology" statement [21]. Participants were identified and referenced by  
116 clinicians who briefly explained the purposes of the study. Participants were eligible if  
117 diagnosed with COPD according to the Global Initiative for Chronic Obstructive Lung  
118 Disease (GOLD) criteria [1] and stable with no acute exacerbations in the month prior to  
119 enrolment. Exclusion criteria were presence of severe cardiac, musculoskeletal, or  
120 neuromuscular diseases, signs of cognitive impairment, active neoplasia or immune  
121 diseases, that could hinder their participation in PR.

122 The opportunity to be integrated in the PR programme was offered to all participants.  
123 Those who did not accept to participate in the intervention but agreed with being  
124 monitored during the 5-month period were included in the control group. The  
125 intervention group (n=38) undertook a 12-week community-based PR program, whereas  
126 the control group (n=38) did not.

127 Sociodemographic (age, sex), anthropometric (height and weight) and general clinical  
128 (smoking habits; medication, long-term oxygen use; number of acute exacerbations and  
129 hospitalizations in the past year and comorbidities - Charlson Comorbidity Index) data  
130 were collected with a structured questionnaire. Lung function was assessed with  
131 spirometry as recommended. Exercise capacity was assessed with the six-minute walk

132 test (6MWT), a self-paced test of walking capacity. Impact of the disease was assessed  
133 with the COPD assessment test (CAT), a 8-item questionnaire, each assessed with a 6-  
134 point Likert scale. Dyspnoea at rest was assessed with the modified Borg Scale (mBorg),  
135 a 10-item scale. Clinical data (pre-post PR for the intervention group and M0-M3 for the  
136 control group) was collected with a structured protocol adapted from the team  
137 published work [22].

138 Saliva samples were collected monthly with the passive drool method. Prior to sample  
139 collection, patients were advised to drink a glass of water (especially if they had recently  
140 drunk coffee or citrus juice) and to provide 3-4 mL of saliva using a labelled sample  
141 collection cup. Subsequently, the sample was transported in a cooler to the lab as  
142 quickly as possible and preserved at -80°C until DNA extraction and/or inflammatory  
143 markers' quantification (stored at -80°C for 1 to 6 months). Response/non-response to  
144 PR was determined based on published minimal clinical importance differences (MCIDs),  
145 i.e., -1 point for mBorg [23]; 25m for 6MWT [24] and -2 points for CAT [25].

146 Deep sequencing of the V4 hypervariable region of 16S rRNA gene (F515/R806 primer  
147 pair) was performed for all samples. The bead assay LEGENDplex™ Human Inflammation  
148 Panel 1 (13-plex) (BioLegend, San Diego, CA, USA) was used to quantify inflammatory  
149 markers (IL-1 $\beta$ , IFN- $\alpha$ 2, IFN- $\gamma$ , TNF- $\alpha$ , MCP-1, IL-6, IL-8, IL-10, IL-12p70, IL-17A, IL-18, IL-  
150 23, and IL-33) in both groups in three timepoints, M0, M1 and M3. QIIME2 2020.8  
151 [26,27] was used to perform microbiota analyses. All statistical analyses were  
152 performed in GraphPad Prism 8 [28] and R software v 3.6.1 [29]. Longitudinal models  
153 (*lme4* package [30]) and repeated-measures correlations (*rmcorr* package [31]) were  
154 performed in R software v 3.6.1 [29]. The full description of the methodology used,

155 including all steps of data collection, processing, and data analyses, are available in  
156 Supplementary file 1.

157

## 158 Results

### 159 Cohort characterisation

160 Seventy-six individuals with COPD were included in this study, 38 (29 male, 72±9y, BMI:  
161 26±4kg/m<sup>2</sup>, FEV<sub>1pp</sub> 49.2±16 % predicted, GOLD A-8, B-20, C-0, D-10) in the intervention  
162 group and the remaining 38 patients (31 male, 70±8y, BMI: 26.4±4.8kg/m<sup>2</sup>, FEV<sub>1pp</sub>  
163 52.3±19.8 % predicted, GOLD A-17, B-12, C-1, D-8) in the control group. Table 1  
164 summarizes the baseline characteristics of the two groups. No significant differences  
165 were found between groups (see Table 1), and therefore, no adjustment for  
166 confounding factors was performed.

167 **Table 1** – Sociodemographic, anthropometric, and clinical characteristics of individuals  
168 with chronic obstructive pulmonary disease at beginning of the study (n=76).

| Characteristics                   | Intervention group<br>(n=38) | Control group<br>(n=38) | p-value            |
|-----------------------------------|------------------------------|-------------------------|--------------------|
| Age (years), mean±SD              | 72±9                         | 70±7.60                 | 0.19 <sup>1</sup>  |
| Gender, n (%)                     |                              |                         | 0.57 <sup>2</sup>  |
| Male                              | 29 (76%)                     | 31 (82%)                |                    |
| Female                            | 9 (24%)                      | 7 (18%)                 |                    |
| BMI (kg/m <sup>2</sup> ), mean±SD | 26±4                         | 26.4±4.8                | 0.72 <sup>3</sup>  |
| FEV <sub>1pp</sub> , mean±SD      | 49.2±16.0                    | 52.3±19.8               | 0.53 <sup>1</sup>  |
| FVC <sub>pp</sub> , mean±SD       | 77.8±17.3                    | 76.9±27.9               | 0.68 <sup>1</sup>  |
| Pack-years, mean±SD               | 42.4±43.0                    | 53.0±51.2               | 0.27 <sup>1</sup>  |
| Comorbidities (CCI), mean±SD      | 4.2±1.4                      | 3.8±1.3                 | 0.10 <sup>1</sup>  |
| GOLD grade, n (%)                 |                              |                         | 0.22 <sup>4</sup>  |
| 1                                 | 3 (8%)                       | 6 (16%)                 |                    |
| 2                                 | 14 (37%)                     | 12 (32%)                |                    |
| 3                                 | 20 (53%)                     | 15 (39%)                |                    |
| 4                                 | 1 (3%)                       | 5 (13%)                 |                    |
| GOLD group, n (%)                 |                              |                         | 0.069 <sup>4</sup> |



|                                                                |             |            |                    |
|----------------------------------------------------------------|-------------|------------|--------------------|
| A                                                              | 8 (21%)     | 17 (45%)   |                    |
| B                                                              | 20 (53%)    | 12 (32%)   |                    |
| C                                                              | 0 (0%)      | 1 (3%)     |                    |
| D                                                              | 10 (26%)    | 8 (21%)    |                    |
| Medication, n (%)                                              |             |            |                    |
| ICS                                                            | 21 (55%)    | 19 (50%)   | 0.8 <sup>4</sup>   |
| LABA                                                           | 33 (87%)    | 30 (79%)   | 0.36 <sup>4</sup>  |
| LAMA                                                           | 24 (63%)    | 25 (66%)   | >0.99              |
| LTRA                                                           | 2 (5%)      | 2 (5%)     | >0.99 <sup>4</sup> |
| SABA                                                           | 9 (24%)     | 5 (13%)    | 0.37 <sup>4</sup>  |
| SAMA                                                           | 2 (5%)      | 0 (5%)     | 0.49 <sup>4</sup>  |
| Macrolides in stability                                        | 0 (0%)      | 0 (0%)     | >0.99              |
| Number of exacerbations in the last year, n (%)                |             |            | 0.60 <sup>2</sup>  |
| 0 or 1                                                         | 27 (71%)    | 29 (76%)   |                    |
| ≥2 or 1 with a hospitalisation                                 | 11 (29%)    | 9 (24%)    |                    |
| Number of hospitalisations in the last year due to COPD, n (%) |             |            | 0.67 <sup>4</sup>  |
| 0                                                              | 32 (84%)    | 34 (89%)   |                    |
| 1                                                              | 2 (5%)      | 3 (8%)     |                    |
| 2                                                              | 3 (8%)      | 1 (3%)     |                    |
| Missing values                                                 | 1 (3%)      | 0 (0%)     |                    |
| mBORG, mean±SD                                                 | 0.8±1.3     | 0.5±1.0    | 0.3 <sup>1</sup>   |
| CAT, mean±SD                                                   | 17.1±8.1    | 11.7±7.4   | 0.003 <sup>1</sup> |
| Walked distance in 6MWT, mean±SD                               | 389.0±133.9 | 457.5±82.8 | 0.045 <sup>1</sup> |

SD: standard deviation, n (%): absolute and relative frequency, respectively; BMI: body mass index, FEV<sub>1pp</sub>: forced expiratory volume in 1 second percent predicted, CCI: charlson comorbidity index, GOLD: global initiative for chronic obstructive lung disease, ICS: inhaled corticosteroids, LABA: long-acting beta agonists, LAMA: long-acting muscarinic agonists, LTRA: leukotriene receptor antagonists, SABA: short-acting beta agonists, SAMA: short-acting muscarinic agonists, <sup>1</sup> p-value obtained with Mann Whitney U-test, <sup>2</sup> p-value obtained with Chi-square test, <sup>3</sup> p-value obtained with unpaired t-test with Welch's correction, <sup>4</sup> p-value obtained with Fisher's exact test.

169

170 Oral microbiota was similar between groups, being composed by two major phyla,  
171 Firmicutes (~43%) and Bacteroidetes (~24%), followed by Proteobacteria, Fusobacteria,  
172 Actinobacteria and ten low abundant phyla (<2%) (Supplementary figure 1).

### 173 [Changes in oral microbiota and inflammatory response are associated with PR](#)

174 We followed the temporal dynamics of beta-diversity (global rate of change (grc) of  
175 Weighted-Unifrac distance) in patients for a period of five months, including the 12  
176 weeks of PR, to understand the impact of PR in microbiota composition. As a control for

177 steady-state microbiota fluctuations, an independent cohort of patients who did not  
178 undergo PR, was surveyed for an equivalent amount of time.

179 The dynamics of microbiota composition was significantly different between patients  
180 undergoing PR and controls (Figure 1A) (lmer on Weighted-Unifrac distance (grc),  
181 Group:Time-point,  $F=7.58$ ,  $p<0.001$ ).

182 Principal coordinate analysis of pairwise distances (Weighted Unifrac) between groups  
183 in each timepoint showed significant differences in microbiota composition between  
184 groups upon one month of PR (Figure 1B) (PERMANOVA,  $F=2.3$ ,  $p=0.038$ ). The top four  
185 amplicon sequence variants (ASVs) responsible for individual's separation after the first  
186 month of PR were identified as *Veillonella*, *Prevotella melaninogenica*, *Haemophilus*  
187 *parainfluenzae* and *Streptococcus*.

188 Regarding microbiota diversity within individuals (alpha diversity), no significant  
189 changes were observed upon PR (Figure 1C) (Wilcoxon test on phylogenetic diversity:  
190  $W=-85$ ,  $p=0.48$ ; Wilcoxon test on Shannon diversity:  $W=-1$ ,  $p>0.99$ ).

191 Next, we compared the microbiota composition of the intervention group at baseline  
192 with that at M1, M2 and M3, to identify which taxa could have been affected by PR.  
193 PERMANOVA (M0vsM1:  $F=0.6$ ,  $p_{adjust}>0.99$ ; M0vsM2:  $F=1.3$ ,  $p_{adjust}>0.99$ ; M0vsM3:  
194  $F=1.2$ ,  $p_{adjust}>0.99$ ; M0vsM4:  $F=1$ ,  $p_{adjust}>0.99$ ; M0vsM5:  $F=1.4$ ,  $p_{adjust}=>0.99$ ), ANCOM  
195 and LEfSe detected no significant differences between pre- and post-PR microbiota  
196 composition. This is compatible with the inherent correlation among the groups  
197 (composed by the same individuals) being stronger than differences introduced by PR.

198 To overcome this limitation, given the longitudinal design of the experiment, we next  
199 tested for differences in taxa dynamics between the intervention and control group. This

200 was performed using linear mixed-effect models. The temporal dynamics of the phylum  
 201 Fusobacteria (lmer, Group:Time-point, F= 5.9, p=0.02) and several oral genera, such as  
 202 *Fusobacterium*, *Streptococcus*, *Dialister* and *Selenomonas* were observed to be  
 203 associated with PR (Table 2). Target testing for the top four ASVs distinguishing patients  
 204 on M1 was also performed. Remarkably, significant alterations in the relative  
 205 abundances of *Prevotella melaninogenica* and *Streptococcus*, two ASVs previously  
 206 associated with disease severity in people with COPD [5], were also found (lmer, *P.*  
 207 *melaninogenica*: Group:Time-point, F= 4.34, p=0.04; lmer, *Streptococcus*: Group:Time-  
 208 point, F= 4.96, p=0.03).

209 **Table 2** – Summary table of significant linear mixed effect models established to assess  
 210 differences in microbiota dynamics between intervention and control groups.

| OTUs/ASVs longitudinal dynamics                                     | test's statistics | p-value (TP:Group) |
|---------------------------------------------------------------------|-------------------|--------------------|
| Fusobacteria                                                        | 5.86              | 0.016              |
| <i>Atopobium</i>                                                    | 5.51              | 0.019              |
| <i>Streptococcus</i>                                                | 5.03              | 0.026              |
| <i>Dialister</i>                                                    | 6.39              | 0.012              |
| <i>Parvimonas</i>                                                   | 4.75              | 0.030              |
| <i>Fusobacterium</i>                                                | 7.00              | 0.009              |
| <i>a5189f77a2cfeab3bc1602ff5c8ac3e9: Streptococcus</i>              | 4.96              | 0.027              |
| <i>d0b698c7298bf04110a6d2f220879bfb: Prevotella melaninogenica</i>  | 4.34              | 0.038              |
| <i>e27680d4009f98f30248d823bc17fb8e: Haemophilus parainfluenzae</i> | 0.18              | 0.673              |
| <i>5608c3e6c9de9ceb79610e7786bd0ac4: Veillonella</i>                | 3.30              | 0.070              |

Models were produced based on the longitudinal relative frequencies of phyla, genera, and ASVs *a5189f77a2cfeab3bc1602ff5c8ac3e9*, *d0b698c7298bf04110a6d2f220879bfb*, *e27680d4009f98f30248d823bc17fb8e* and *5608c3e6c9de9ceb79610e7786bd0ac4*. Data upon relative frequencies was transformed with arcsine and square root transformation. TP: time-point

211

212 Considering that changes in microbiota are expected to be related with the  
 213 inflammatory response, we further quantified a panel of 13 cytokines in three time  
 214 points: M0, M1 and M3 in both intervention and control groups (Figure 2 and

215 Supplementary figure 2). Significant changes in the inflammatory profile of patients  
216 undergoing PR were observed (Figure 2). Specifically, upon one month of PR (M1)  
217 significant increases in the amounts of IL-10 and IL-18 were observed (Wilcoxon signed-  
218 rank: IL-10,  $W=163$   $p_{adjust}=0.038$ ; IL-18,  $W=165$   $p_{adjust}=0.035$ ). No significant changes  
219 were observed in the same period in control group. After three months of PR (M3), TNF-  
220  $\alpha$ , IL-1 $\beta$ , IL-18, IL-10 and IL-6 were also significantly higher than at baseline (M0)  
221 (Wilcoxon signed-rank: IL-1 $\beta$ ,  $W=205$   $p_{adjust}=0.016$ ; TNF- $\alpha$ ,  $W=251$   $p_{adjust}=0.002$ ; IL-10,  
222  $W=263$   $p_{adjust}=0.0008$ ; IL-6,  $W=189$   $p_{adjust}=0.03$ ; IL-18,  $W=233$   $p_{adjust}=0.004$ ). IL-10 and IL-  
223 6 also increased in the control group over the same time interval (Wilcoxon signed-rank:  
224 IL-10,  $W=225$   $p_{adjust}=0.018$ ; IL-6,  $W=224$   $p_{adjust}=0.019$ ), suggesting that these cytokines  
225 may be less stable.

226 Regarding comparisons between the groups, shifts in IL-10 and IL-18 were significantly  
227 higher after 1 month of PR than the equivalent shifts in the control group (Mann-  
228 Whitney U-test, IL-10,  $U=180$   $p=0.043$ ; IL-18,  $U=173$   $p=0.03$ ). Over 3 months of PR, TNF-  
229  $\alpha$ , IL-18 and IL-10 had significantly higher shifts in the intervention than in the control  
230 group (Mann-Whitney U-test, TNF- $\alpha$ ,  $U=246$   $p=0.04$ ; IL-10,  $U=196$   $p=0.0004$ ; IL-18,  
231  $U=249$   $p=0.046$ ). No additional significant differences were found in both groups  
232 (Supplementary figure 2).

233 Interestingly, the variance associated with cytokine shifts over time was generally higher  
234 in the intervention than in the control group (Supplementary table 2). This is compatible  
235 with PR generally influencing cytokine levels.

236 Oral microbiota and inflammatory response vary differentially among responders and  
237 non-responders during PR

238 PR improved all outcomes significantly (Wilcoxon test,  $p < 0.05$ ), except for BMI ( $W=$   
239 114,  $p=0.31$ ) and mBorg ( $W=37$ ,  $p=0.5$ ) (Supplementary table 3). Mean improvements  
240 only exceeded the MCID for exercise capacity (6MWT, mean-diff: 45.43; Cohen's  
241  $d=0.34$ ) (Supplementary table 2). Supplementary figure 3 represents the overlap  
242 between responders (R) and non-responders (NR) to PR in exercise capacity (6MWT),  
243 impact of disease (CAT) and dyspnoea (mBorg). From 38 patients, 24% responded in  
244 dyspnoea, 63% responded in exercise capacity and 63% responded in the impact of  
245 disease. 16% of patients responded simultaneously to all three domains and 16% failed  
246 to respond to any domain.

247 We analysed differences in microbiota composition among R and NR at M0 to query for  
248 a possible relationship between microbiota composition before PR and its effectiveness  
249 (Figure 3A). Principal coordinate analysis of pairwise distances (Weighted-Unifrac)  
250 showed significant differences between R and NR to dyspnoea (PERMANOVA  $p = 0.04$ )  
251 and captured 66% of total diversity (Figure 3B). Furthermore, the ASV responsible for  
252 the biggest separation between individuals in this analysis, was *P. melaninogenica*,  
253 whose frequency was below average in 75% of R. In accordance, the differential  
254 abundance analysis (LEfSe) showed that *Prevotella* (Figure 3C) was significantly enriched  
255 in NR to dyspnoea, with an effect-size of 9. No significant differences were observed for  
256 the other domains.

257 Next, we used linear mixed effect models to compare the microbiota temporal dynamics  
258 between R and NR. Despite being differentially represented in R and NR (to dyspnoea)  
259 before PR, the frequency trajectory of *P. melaninogenica* was not significantly different

260 among the two sets of patients during the intervention. Instead, several other taxa were  
 261 found to have significantly different trajectories between the groups (Table 3 and  
 262 Supplementary figure 4). Regarding the exercise capacity, the frequency trajectory of  
 263 *Lautropia* (family *Burkholderiaceae*) was significantly different between R and NR (Imer,  
 264 Group:Time-point,  $F= 2.9$ ,  $p=0.02$ ), reaching higher values in NR by the end of PR  
 265 (Supplementary figure 3). The dynamics of *P. melaninogenica* was distinct among R and  
 266 NR (Imer, Group:Time-point,  $F= 2.6$ ,  $p=0.03$ ) to impact of disease (Supplementary figure  
 267 4).

268 **Table 3** – Summary table of significant linear mixed effect models established to assess  
 269 differences in microbiota dynamics between responders and non-responders to  
 270 dyspnoea, exercise capacity and impact of the disease.

| OTUs/ASVs longitudinal dynamics                                                              | test's statistics | p-value (TP:Group) |
|----------------------------------------------------------------------------------------------|-------------------|--------------------|
| <b>Response to dyspnoea during exercise (Borg Modified Scale of Dyspnoea) MCID: -1 point</b> |                   |                    |
| <i>Spirochaetes</i>                                                                          | 2.33              | 0.046              |
| TM7                                                                                          | 5.40              | 0.000              |
| <i>Oribacterium</i>                                                                          | 2.68              | 0.024              |
| <i>Dialister</i>                                                                             | 2.69              | 0.023              |
| <i>Schwartzia</i>                                                                            | 2.55              | 0.036              |
| [ <i>Mogibacteriaceae</i> ]                                                                  | 2.45              | 0.036              |
| <i>Bulleidia</i>                                                                             | 3.08              | 0.011              |
| <i>Treponema</i>                                                                             | 2.33              | 0.046              |
| <b>Response to exercise capacity (6-minute walk test) MCID: +25m</b>                         |                   |                    |
| <i>Lautropia</i>                                                                             | 2.87              | 0.017              |
| <b>Response to impact of the disease (COPD assessment test) MCID: -2 points</b>              |                   |                    |
| <i>d0b698c7298bf04110a6d2f220879bfb: Prevotella melaninogenica</i>                           | 2.58              | 0.029              |

Models were produced based on the longitudinal relative frequencies of phyla, genera, *a5189f77a2cfeab3bc1602ff5c8ac3e9* and *d0b698c7298bf04110a6d2f220879bfb*. Data upon relative frequencies was transformed with arcsine and square root transformation. TP: time-point

271

272 We compared the salivary levels of cytokines present in R and NR to question whether  
273 responsiveness to PR was related with the inflammatory response. Distinct patterns of  
274 inflammatory response were observed between R and NR, in all domains  
275 (Supplementary figure 5). Significant shifts during PR were always towards values higher  
276 than the baseline and occurred mainly in NR patients. Specifically, after PR, levels of  
277 TNF $\alpha$ , IL-1 $\beta$ , IL-18 and IL-10 were higher in NR of all domains, whereas only TNF- $\alpha$  and  
278 IL-10 showed significant changes in R patients (please see Supplementary figure 5 for  
279 details on the statistical tests results). Interestingly, the variance in cytokine shifts after  
280 PR was also mostly higher in NR than in R (Supplementary tables 4–6).

#### 281 [PR effectiveness is related with specific bacteria-inflammation correlation signatures](#)

282 Independent analyses revealed an association between PR effectiveness and either  
283 changes in oral microbiota or inflammatory markers. We explored the patterns of  
284 longitudinal correlation between the two to understand in what extent PR effectiveness  
285 is linked with specific bacteria-inflammation associations. Figure 4 represents the  
286 network of significant correlations between inflammatory markers and bacterial genera  
287 inferred for the three domains. Remarkably, R and NR presented distinct patterns of  
288 bacteria-cytokine correlation (Figure 4).

289 In all groups of NR, *Lautropia* showed a strong positive correlation with several pro-  
290 inflammatory cytokines, being the strongest with TNF- $\alpha$  in NR to exercise capacity  
291 (rmcorr = 0.65,  $p=0.002$ ) and impact of the disease (rmcorr = 0.63,  $p=0.002$ ). Conversely,  
292 *Rothia* presented a negative correlation with several pro-inflammatory markers in all  
293 groups of R, with the strongest correlation with TNF- $\alpha$  (rmcorr = -0.73,  $p=0.007$ ).  
294 Furthermore, *Gemellaceae*, was also negatively correlated with several inflammatory

295 markers (strongest with IL-8,  $\text{rmcorr} = -0.69$ ,  $p < 0.0001$ ) in R to exercise capacity and  
296 impact of the disease. Strikingly, except for a positive correlation between *Haemophilus*  
297 and IFN- $\alpha 2$  in R to impact of the disease ( $\text{rmcorr} = 0.43$ ,  $p = 0.03$ ), all significant  
298 correlations with Proteobacteria were found in NR.

299 We then performed a longitudinal correlation analysis between bacterial frequencies to  
300 gain further insight on bacterial interactions that might be related with PR  
301 responsiveness but are not necessarily linked with the immune response (Figure 5). In  
302 an effort to be conservative, since compositional data are intrinsically correlated, we  
303 chose a subset of taxa for this analysis. We included the major hubs found in the  
304 correlation between bacteria and inflammatory markers (*Lautropia*, *Rothia*,  
305 *Gemellaceae* and *Kingella*), plus five other oral taxa previously associated [5] with  
306 severity (*Prevotella*, *P. melaninogenica*, *Streptococcus*, *Streptococcus sp.*, *Haemophilus*  
307 and *Porphyromonas*).

308 In this analysis, *Prevotella*, whose frequency drops during PR in all NR (Supplementary  
309 figure 6 A-C), was negatively correlated with *Haemophilus* ( $\text{rmcorr} = -0.46$ ,  $p = 0.005$ ),  
310 *Streptococcus* ( $\text{rmcorr} = -0.37$ ,  $p = 0.03$ ) and *Lautropia* ( $\text{rmcorr} = -0.41$ ,  $p = 0.01$ ) in NR to  
311 dyspnoea and with *Haemophilus* ( $\text{rmcorr} = -0.73$ ,  $p = 0.0004$ ) in NR to exercise capacity.  
312 Conversely, during the first month of PR, the frequency of *P. melaninogenica* increased  
313 in all R (Supplementary figure 6A-C) and was negatively correlated with *Kingella* (R to  
314 dyspnoea,  $\text{rmcorr} = -0.59$ ,  $p = 0.04$ ), *Lautropia* (R to exercise capacity,  $\text{rmcorr} = -0.52$ ,  
315  $p = 0.004$ ; R to impact of the disease,  $\text{rmcorr} = -0.43$ ,  $p = 0.03$ ) and *Streptococcus* (R to  
316 impact of the disease,  $\text{rmcorr} = -0.41$ ,  $p = 0.04$ ). *Gemellaceae* and *Rothia* were strongly  
317 positively correlated in all R (strongest in dyspnoea,  $\text{rmcorr} = 0.9$ ,  $p < 0.0001$ ).



318

319 **Discussion**

320 We show, for the first time, that oral microbiota changes with PR and that shifts in  
321 specific taxa appear to be strongly related with its effectiveness. By tracking two  
322 independent groups of patients for almost half a year we were able to distinguish  
323 between steady-state microbiota fluctuations and those possibly induced by PR.  
324 Contrary to the simple expectation that a well-established therapy should positively  
325 impact on patients' microbiota, a more complex reality was unravelled. Overall, PR was  
326 not able to boost microbiota diversity within patients, a hallmark of dysbiosis, causing  
327 only low magnitude changes in a few taxa, and elicited the secretion of several pro-  
328 inflammatory cytokines.

329 However, when considering separately R and NR, taxa potentially related with  
330 responsiveness emerges and a differential inflammatory response becomes apparent.  
331 Previously, we have observed that low frequency of *Prevotella*, and in particular *P.*  
332 *melaninogenica*, was associated with a recent history of severe exacerbation [5]. Here  
333 we observed that in the first month of PR *Prevotella* was boosted in R of all domains.  
334 We hypothesize that this boost could be directly or indirectly related with the ability to  
335 respond. For example, by directly inducing the reduction of lung epithelial cell  
336 permeability (by modulating expression of tight junction proteins) [32], or indirectly by  
337 promoting lung innate immune responses, particularly against *Streptococcus*  
338 *pneumoniae* [33] and *Lautropia*, to which it was negatively correlated.

339 In fact, it has been recently observed that *P. melaninogenica* is able to promote *S.*  
340 *pneumoniae* rapid clearance from the lung via TLR2 activation, recruitment of

341 neutrophils and upregulation of TNF $\alpha$  and IL-10 [34]. Interestingly, it was also observed  
342 that the aspiration of a mixture of 3 species of human oral commensals in mice, including  
343 *P. melaninogenica*, decreased host's susceptibility to *S. pneumoniae* [33].

344 Supporting the hypothesis that, by counteracting *Lautropia*, *Prevotella* could be  
345 positively associated with PR effectiveness, is the observation that *Lautropia* is enriched  
346 in the oral microbiota of more severe cases of COPD [5] and co-occur with high levels of  
347 inflammatory markers in the eosinophilic COPD [35], an endotype that has been  
348 suggested to be predictive of worse outcome upon PR [36] .

349 Conversely, in NR to dyspnoea and exercise capacity, the opposite scenario was  
350 observed, that is, a clear decline in *Prevotella* upon PR, negatively correlated with  
351 *Haemophilus* (exercise capacity) and with *Streptococcus* and *Lautropia* (dyspnoea). A  
352 pro-inflammatory role in COPD has been repeatedly attributed to the first two taxa [37]  
353 which could likely contribute to the lack of response to this therapy. Besides this,  
354 *Lautropia* positively correlated with several pro-inflammatory markers in all groups of  
355 NR.

356 Another striking observation, possibly related with the success of PR across the three  
357 domains, was the co-occurrence of *Rothia* and *Gemellaceae* (in R) and its negative  
358 correlation with several pro-inflammatory markers during PR. *Rothia mucilaginoso* (the  
359 most abundant species of *Rothia* genus in our dataset) has been identified as an anti-  
360 inflammatory bacterium when present in the lungs (even in low abundance) of people  
361 with chronic respiratory diseases [38]. This has been attributed to its ability to reduce  
362 the levels of several pro-inflammatory cytokines and NF-kB activation in response to

363 immune stimulation by pathogenic bacteria like *Pseudomonas aeruginosa* and  
364 *Staphylococcus aureus* [38].

365 Considering the impact of PR on individual species, this was significant on the  
366 longitudinal dynamics of two particular ASVs, *P. melaninogenica* and *Streptococcus*,  
367 previously suggested to be associated with COPD severity [5]. Moreover, the  
368 longitudinal dynamics of *P. melaninogenica* was distinct among R and NR to impact of  
369 the disease, supporting its importance to PR effectiveness.

370 Besides its immunomodulatory properties, *P. melaninogenica* could have an additional  
371 role in PR effectiveness, since it belongs to the most prevalent genus of oral nitrate-  
372 reducing bacteria [39]. These are essential for the nitrate-nitrite-nitric oxide pathway  
373 which is implicated in exercise performance and recovery [14,15]. Coherently, it has  
374 been shown that nitrate oral supplementation increased the beneficial effects of PR  
375 [16].

376 Several inconsistencies have been reported regarding the effects of PR in the  
377 inflammatory status of people with COPD. Although it is unlikely that PR increases  
378 inflammation in the long-term, our findings corroborate the previous reported increase  
379 of TNF- $\alpha$  in plasma of people with COPD upon PR [23]. The observed increase of IL-10  
380 suggest an attempt to counterbalance the rise of pro-inflammatory cytokines during PR,  
381 possibly via inhibition of nuclear factor kappa B (NF- $\kappa$ B) and the synthesis of pro-  
382 inflammatory cytokines [24].

383 Furthermore, it has been observed that an inflammatory response (measured by an  
384 increase in serum levels of IL-1 $\beta$ , TNF- $\alpha$  and IL-10) is necessary for recovery from

385 exercise-induced muscle damage [27, 28]. Given the overlap between inflammatory  
386 profiles of saliva and serum [25, 26], our results could reflect a similar process.

387 Some limitations of our study need to be acknowledged. First, the use of saliva for COPD  
388 assessment is still exploratory. Although the microbiota of upper and lower airways is  
389 highly correlated, with oral bacteria being the major colonizers of the lungs through  
390 microaspiration [10–12], more studies, besides Melo-Dias et al [5] validating its  
391 biological relevance in the context of COPD are needed. Additionally, despite  
392 longitudinal studies including PR being very resource demanding, further works with  
393 similar design should be carried out, ideally including multicentric trials with larger  
394 cohorts to evaluate the robustness of the findings. This is particularly important to  
395 assess the association between responsiveness and microbiota modulation. Second,  
396 clinical data collection was performed pre-post intervention and therefore it is not  
397 possible to adjust longitudinal models for multiple confounders such as occurrence of  
398 exacerbations, treatment with inhaled-corticosteroids and/or antibiotics.

399 Overall, besides responsiveness to PR being multidimensional and heterogeneous,  
400 giving rise to a moderate overlap in individuals response across domains, PR-induced  
401 changes in microbiota revealed surprisingly consistent patterns among R and NR.  
402 Furthermore, our findings suggest that PR effectiveness could be associated with a  
403 controlled inflammatory response to exercise, *i.e.*, the inflammatory response to  
404 exercise occurs accompanied by efficient regulatory mechanisms. These mechanisms  
405 can be mediated by bacteria and could be tested *in vitro*.

406 Future studies should address the implications and stability of these findings, clarifying  
407 the role of oral microbiota both as a biomarker of PR responsiveness and as a  
408 therapeutic target.

409 [Acknowledgements:](#)

410 [Author contributions:](#)

411 S. Melo-Dias and A. Sousa had full access to all data in the study and take responsibility  
412 for the integrity of the data and the accuracy of the data analysis. A. Marques was  
413 responsible for ethical approval. A. Marques and A. Sousa were responsible for obtaining  
414 the funding, conceiving and designing the study. M. A. Mendes, J. Cravo and S. Souto-  
415 Miranda provided a substantial contribution for clinical data acquisition. S. Melo-Dias A.  
416 Furtado conducted sample processing, DNA extraction procedures and inflammatory  
417 markers quantification. S. Melo-Dias, M. Cabral, A. Furtado, C. R. Almeida and A. Sousa  
418 conducted bioinformatics and statistical analyses. S. Melo-Dias and A. Sousa drafted the  
419 manuscript. All authors critically revised the manuscript, ensured accuracy and integrity  
420 of the work and approved the final version to be published.

421 [Availability of data and materials:](#)

422 The dataset supporting the conclusions of this article is included within the article (and  
423 its additional file(s)). Furthermore, raw sequencing data was deposited in National  
424 Centre for Biotechnology Information's (NCBI) Sequence Read Archive (SRA) (BioProject  
425 PRJNA872131). Scripts for data analyses are provided in supplementary file 1.

426 [Ethics approval and consent to participate:](#)

427 A cross-sectional study was conducted. Ethical approvals were obtained from  
428 Administração Regional de Saúde Centro (64/2016) and from Centro Hospitalar do Baixo  
429 Vouga (08-03-17). Written informed consent was obtained from all participants.

430 [Consent for publication:](#)

431 Not applicable.

432 [Acknowledgements:](#)

433 We are grateful to all people with COPD who accepted to participate in this study and

434 to the team of Respiratory Research and Rehabilitation Laboratory, School of Health

435 Sciences (Lab3R-ESSUA) for their support.

## 436 References

- 437 1 2022 GOLD Reports. Global Initiative for Chronic Obstructive Lung Disease - GOLD.  
438 <https://goldcopd.org/2022-gold-reports-2/> (accessed 7 Jan 2022).
- 439 2 Casaburi R. Pulmonary Rehabilitation: Where We've Succeeded and Where We've Failed.  
440 *COPD: Journal of Chronic Obstructive Pulmonary Disease* 2018;**15**:219–22.  
441 doi:10.1080/15412555.2018.1503245
- 442 3 Augustin IML, Franssen FME, Houben-Wilke S, *et al.* Multidimensional outcome assessment  
443 of pulmonary rehabilitation in traits-based clusters of COPD patients. *PLOS ONE*  
444 2022;**17**:e0263657. doi:10.1371/journal.pone.0263657
- 445 4 Spruit MA, Augustin IML, Vanfleteren LE, *et al.* Differential response to pulmonary  
446 rehabilitation in COPD: multidimensional profiling. *Eur Respir J* 2015;**46**:1625–35.  
447 doi:10.1183/13993003.00350-2015
- 448 5 Melo-Dias S, Valente C, Andrade L, *et al.* Saliva as a non-invasive specimen for COPD  
449 assessment. *Respiratory Research* 2022;**23**:16. doi:10.1186/s12931-022-01935-9
- 450 6 Budden KF, Shukla SD, Rehman SF, *et al.* Functional effects of the microbiota in chronic  
451 respiratory disease. *The Lancet Respiratory Medicine* 2019;**7**:907–20. doi:10.1016/S2213-  
452 2600(18)30510-1
- 453 7 Marsland BJ, Gollwitzer ES. Host–microorganism interactions in lung diseases. *Nat Rev*  
454 *Immunol* 2014;**14**:827–35. doi:10.1038/nri3769
- 455 8 Ubags NDJ, Marsland BJ. Mechanistic insight into the function of the microbiome in lung  
456 diseases. *European Respiratory Journal* 2017;**50**. doi:10.1183/13993003.02467-2016
- 457 9 Rand IAD, Blaikley J, Booton R, *et al.* British Thoracic Society guideline for diagnostic flexible  
458 bronchoscopy in adults: accredited by NICE. *Thorax* 2013;**68**:i1–44. doi:10.1136/thoraxjnl-  
459 2013-203618
- 460 10 Gaeckle NT, Pragman AA, Pendleton KM, *et al.* The Oral-Lung Axis: The Impact of Oral Health  
461 on Lung Health. *Respir Care* 2020;**65**:1211–20. doi:10.4187/respcare.07332
- 462 11 Mammen MJ, Scannapieco FA, Sethi S. Oral-lung microbiome interactions in lung diseases.  
463 *Periodontology 2000* 2020;**83**:234–41. doi:10.1111/prd.12301
- 464 12 Huffnagle GB, Dickson RP, Lukacs NW. The respiratory tract microbiome and lung  
465 inflammation: a two-way street. *Mucosal Immunol* 2017;**10**:299–306.  
466 doi:10.1038/mi.2016.108
- 467 13 Dyakova EY, Kapilevich LV, Shylko VG, *et al.* Physical exercise associated with NO production:  
468 signaling pathways and significance in health and disease. *Front Cell Dev Biol* 2015;**3**:19.  
469 doi:10.3389/fcell.2015.00019
- 470 14 Bescos R, Brookes ZLS, Belfield LA, *et al.* Modulation of oral microbiota: A new frontier in  
471 exercise supplementation. *PharmaNutrition* 2020;**14**:100230.  
472 doi:10.1016/j.phanu.2020.100230



- 473 15 Cutler C, Kiernan M, Willis JR, *et al.* Post-exercise hypotension and skeletal muscle  
474 oxygenation is regulated by nitrate-reducing activity of oral bacteria. *Free Radical Biology*  
475 *and Medicine* 2019;**143**:252–9. doi:10.1016/j.freeradbiomed.2019.07.035
- 476 16 Pavitt MJ, Tanner RJ, Lewis A, *et al.* Oral nitrate supplementation to enhance pulmonary  
477 rehabilitation in COPD: ON-EPIC a multicentre, double-blind, placebo-controlled,  
478 randomised parallel group study. *Thorax* 2020;**75**:547–55. doi:10.1136/thoraxjnl-2019-  
479 214278
- 480 17 Clauss M, Gérard P, Mosca A, *et al.* Interplay Between Exercise and Gut Microbiome in the  
481 Context of Human Health and Performance. *Frontiers in Nutrition*  
482 2021;**8**.<https://www.frontiersin.org/article/10.3389/fnut.2021.637010> (accessed 12 May  
483 2022).
- 484 18 Gammal AIE, O’Farrell R, O’Mahony L, *et al.* Systemic Inflammatory Markers and Disease  
485 Severity in Chronic Obstructive Pulmonary Disease—The Effect of Acute Exercise and  
486 Pulmonary Rehabilitation. *Open Journal of Respiratory Diseases* 2015;**5**:19–31.  
487 doi:10.4236/ojrd.2015.51003
- 488 19 van der Vlist J, Janssen TWJ. The potential anti-inflammatory effect of exercise in chronic  
489 obstructive pulmonary disease. *Respiration* 2010;**79**:160–74. doi:10.1159/000233264
- 490 20 Gigliotti F, Coli C, Lombardelli L, *et al.* Effect of pulmonary rehabilitation (PR) on  
491 inflammation status in patients with COPD. *European Respiratory Journal* 2015;**46**.  
492 doi:10.1183/13993003.congress-2015.PA2210
- 493 21 Elm E von, Altman DG, Egger M, *et al.* Strengthening the reporting of observational studies  
494 in epidemiology (STROBE) statement: guidelines for reporting observational studies. *BMJ*  
495 2007;**335**:806–8. doi:10.1136/bmj.39335.541782.AD
- 496 22 Marques A, Jácome C, Rebelo P, *et al.* Improving access to community-based pulmonary  
497 rehabilitation: 3R protocol for real-world settings with cost-benefit analysis. *BMC Public*  
498 *Health* 2019;**19**:676. doi:10.1186/s12889-019-7045-1
- 499 23 Jones PW, Beeh KM, Chapman KR, *et al.* Minimal clinically important differences in  
500 pharmacological trials. *Am J Respir Crit Care Med* 2014;**189**:250–5.  
501 doi:10.1164/rccm.201310-1863PP
- 502 24 Holland AE, Hill CJ, Rasekaba T, *et al.* Updating the minimal important difference for six-  
503 minute walk distance in patients with chronic obstructive pulmonary disease. *Arch Phys*  
504 *Med Rehabil* 2010;**91**:221–5. doi:10.1016/j.apmr.2009.10.017
- 505 25 Kon SSC, Canavan JL, Jones SE, *et al.* Minimum clinically important difference for the COPD  
506 Assessment Test: a prospective analysis. *Lancet Respir Med* 2014;**2**:195–203.  
507 doi:10.1016/S2213-2600(14)70001-3
- 508 26 Bolyen E, Rideout JR, Dillon MR, *et al.* Reproducible, interactive, scalable and extensible  
509 microbiome data science using QIIME 2. *Nat Biotechnol* 2019;**37**:852–7.  
510 doi:10.1038/s41587-019-0209-9
- 511 27 QIIME 2. <https://qiime2.org/> (accessed 12 Jan 2022).

- 512 28 Prism - GraphPad. <https://www.graphpad.com/scientific-software/prism/> (accessed 12 Jan  
513 2022).
- 514 29 R: The R Project for Statistical Computing. <https://www.r-project.org/> (accessed 12 Jan  
515 2022).
- 516 30 Bates D, Mächler M, Bolker B, *et al.* Fitting Linear Mixed-Effects Models Using lme4. *Journal*  
517 *of Statistical Software* 2015;**67**:1–48. doi:10.18637/jss.v067.i01
- 518 31 Bakdash JZ, Marusich LR. Repeated Measures Correlation. *Frontiers in Psychology*  
519 2017;**8**.<https://www.frontiersin.org/article/10.3389/fpsyg.2017.00456> (accessed 15 Mar  
520 2022).
- 521 32 Ramsheh MY, Haldar K, Esteve-Codina A, *et al.* Lung microbiome composition and bronchial  
522 epithelial gene expression in patients with COPD versus healthy individuals: a bacterial 16S  
523 rRNA gene sequencing and host transcriptomic analysis. *The Lancet Microbe* 2021;**2**:e300–  
524 10. doi:10.1016/S2666-5247(21)00035-5
- 525 33 Wu BG, Sulaiman I, Tsay J-CJ, *et al.* Episodic Aspiration with Oral Commensals Induces a  
526 MyD88-dependent, Pulmonary T-Helper Cell Type 17 Response that Mitigates Susceptibility  
527 to *Streptococcus pneumoniae*. *Am J Respir Crit Care Med* 2021;**203**:1099–111.  
528 doi:10.1164/rccm.202005-1596OC
- 529 34 Horn KJ, Schopper MA, Drigot ZG, *et al.* Airway Prevotella promote TLR2-dependent  
530 neutrophil activation and rapid clearance of *Streptococcus pneumoniae* from the lung. *Nat*  
531 *Commun* 2022;**13**:3321. doi:10.1038/s41467-022-31074-0
- 532 35 Wang Z, Locantore N, Haldar K, *et al.* Inflammatory Endotype-associated Airway  
533 Microbiome in Chronic Obstructive Pulmonary Disease Clinical Stability and Exacerbations:  
534 A Multicohort Longitudinal Analysis. *Am J Respir Crit Care Med* 2021;**203**:1488–502.  
535 doi:10.1164/rccm.202009-3448OC
- 536 36 Blood Eosinophils and Pulmonary Rehabilitation in COPD - PubMed.  
537 <https://pubmed.ncbi.nlm.nih.gov/34777651/> (accessed 24 Jul 2022).
- 538 37 Celli BR, Wedzicha JA. Update on Clinical Aspects of Chronic Obstructive Pulmonary Disease.  
539 *N Engl J Med* 2019;**381**:1257–66. doi:10.1056/NEJMra1900500
- 540 38 *Rothia mucilaginosa* is an anti-inflammatory bacterium in the respiratory tract of patients  
541 with chronic lung disease | European Respiratory Society.  
542 <https://erj.ersjournals.com/content/early/2021/09/16/13993003.01293-2021> (accessed  
543 12 May 2022).
- 544 39 Burleigh MC, Liddle L, Monaghan C, *et al.* Salivary nitrite production is elevated in individuals  
545 with a higher abundance of oral nitrate-reducing bacteria. *Free Radic Biol Med*  
546 2018;**120**:80–8. doi:10.1016/j.freeradbiomed.2018.03.023
- 547

548 **Figures**

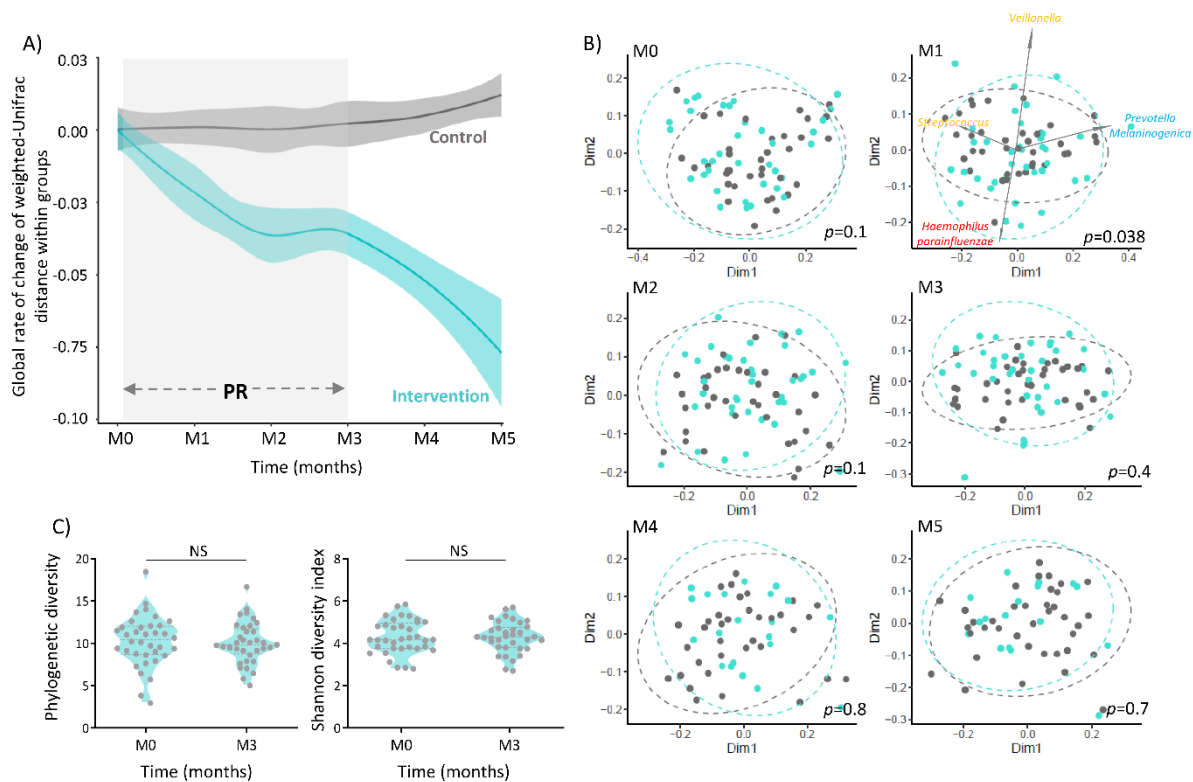

549

550 **Figure 1. Pulmonary rehabilitation modulates the microbiota composition of people with**

551 **COPD, but does not affect alpha diversity. A)** Global rate of change of beta diversity was

552 estimated by subtraction of baseline values at all timepoints. Blue and grey loess lines were

553 fitted over the data points representing beta-diversity relative to baseline along time in the

554 intervention and control groups, respectively. The blue and grey areas represent the 0.95

555 confidence intervals. (M0=immediately prior PR; M1, M2, M3= 1,2,3 months after initiating PR;

556 M4, M5=1 and 2 months after finishing PR). Intervention and control group presented different

557 microbiota dynamics over the 5-month follow-up (LMER on Weighted Unifrac distance matrix,

558 Group:Time-Point,  $p < 0.001$ ). The grey rectangle indicates the time interval spanning PR. **B)**

559 Principal coordinate analysis of Weighted Unifrac distance between groups in each timepoint.

560 (M0, M1, M2, M3, M4 and M5). Significant differences in microbiota composition between

561 groups were observed in M1 (PERMANOVA,  $F=2.27$ ,  $p=0.038$ ). Blue and grey dots and ellipses

562 represent intervention and control groups, respectively. The biplot represented in M1 show the

563 top ASVs contributing for sample segregation (*5608c3e6c9de9ceb79610e7786bd0ac4*:

564 *Veillonella*, *d0b698c7298bf04110a6d2f220879bfb*: *Prevotella melaninogenica*,  
 565 *e27680d4009f98f30248d823bc17fb8e*: *Haemophilus parainfluenzae*,  
 566 *a5189f77a2cfeab3bc1602ff5c8ac3e9*: *Streptococcus*). C) No pre-post differences were observed  
 567 in alpha diversity (Phylogenetic index and Shannon diversity index) in the Intervention group  
 568 (Wilcoxon test: phylogenetic diversity:  $W = -85$ ,  $p = 0.48$ ; Shannon diversity index:  $W = -1$ ,  $p > 0.99$ ).  
 569 \* $p < 0.05$ , \*\* $p < 0.01$ , \*\*\* $p < 0.001$

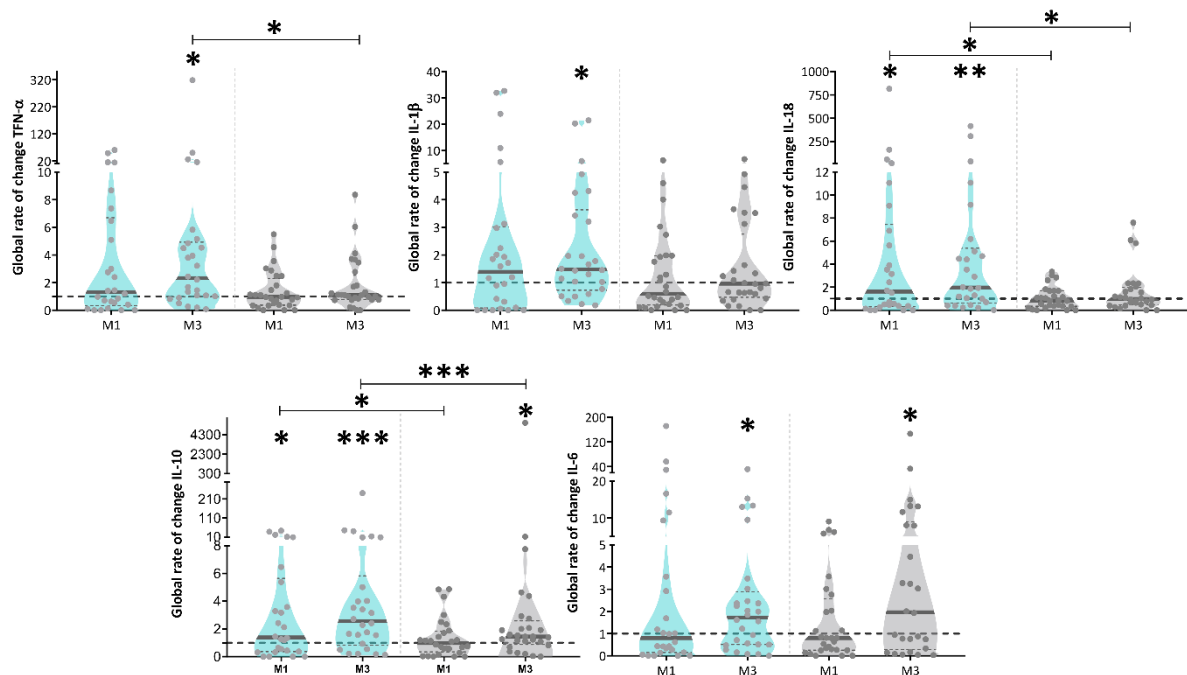

570

571 **Figure 2. The inflammatory profile of people with COPD changes upon pulmonary**  
 572 **rehabilitation.** Global rate of change represents the ratio between cytokine values measured at  
 573 baseline and M1 or M3 (*i.e.* M1/M0 and M3/M0). Differences between M1 and the baseline and  
 574 between M3 and the baseline were assessed by Wilcoxon signed-rank, in each group  
 575 (intervention (blue) and control (grey)). Differences between groups at M1 and M3 were  
 576 assessed by Mann-Whitney U-test.  $p < 0.05$ , \*\* $p < 0.01$ , \*\*\* $p < 0.001$ . All cytokines for which a  
 577 significant shift was observed are represented in this figure. Supplementary figure 2 shows the  
 578 data for the remaining 8 cytokines.

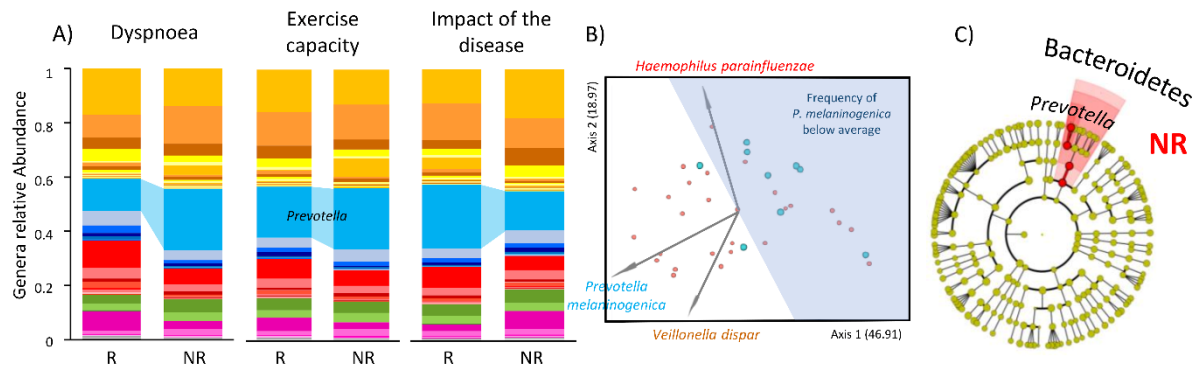

579

580 **Figure 3. Responders and non-responders present distinct microbiota profiles prior to**  
581 **pulmonary rehabilitation. A)** Mean frequency of phyla and genera of bacteria present in  
582 Responders (R) and non-responders (NR) to dyspnoea, exercise capacity and impact of the  
583 disease. **B)** R and NR to dyspnoea showed distinct microbiota composition prior to PR  
584 (PERMANOVA,  $p=0.04$ ). PCoA analysis using Emperor on Weighted UniFrac distance. The biplot  
585 (grey arrows) represent the 3 most relevant ASVs for R and NR segregation. *Prevotella*  
586 *melaninogenica* (ASV: d0b698c7298bf04110a6d2f220879bfb) was the major contributor for  
587 segregation of R and NR followed by *Veillonella dispar* (ASV:  
588 5608c3e6c9de9ceb79610e7786bd0ac) and *Haemophilus parainfluenzae* (ASV:  
589 e27680d4009f98f30248d823bc17fb8e). In blue is represented the area where samples  
590 presented a mean frequency of *P. melaninogenica* below the average of the dataset. 78% of R  
591 showed reduced mean frequencies of *P. melaninogenica* prior to PR while only 37% of NR  
592 followed the same trend. **C)** Cladogram highlighting differentially abundant genera between R  
593 and NR to dyspnoea prior to PR, inferred by linear discriminant analysis (LEfSe) at a significance  
594 cut-off of 3. *Prevotella* is significantly enriched in NR to dyspnoea, with an effect-size of 9.

**Dyspnoea**  
NR

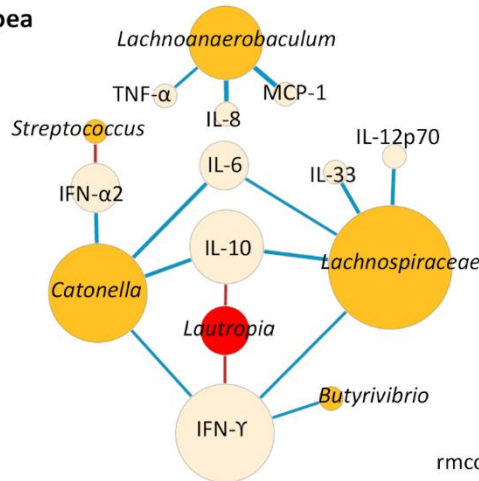

**R**

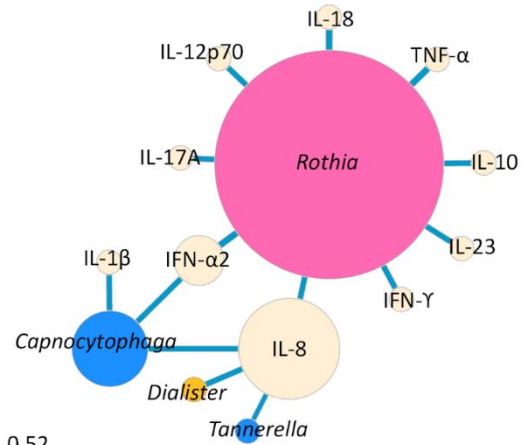

rmcorr: -0.75 – 0.52

**Exercise capacity**  
NR

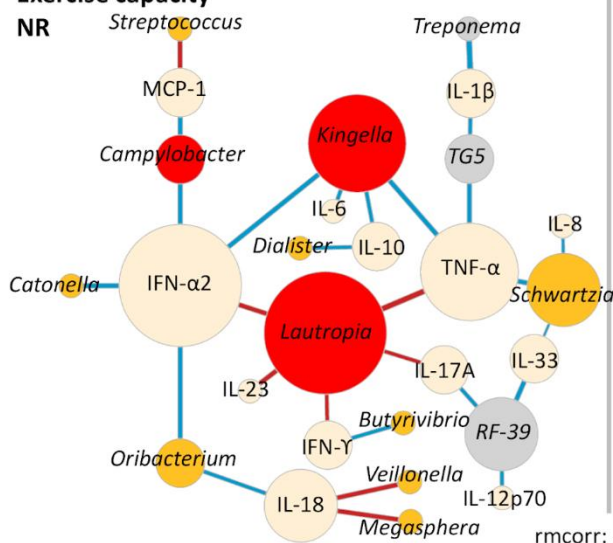

**R**

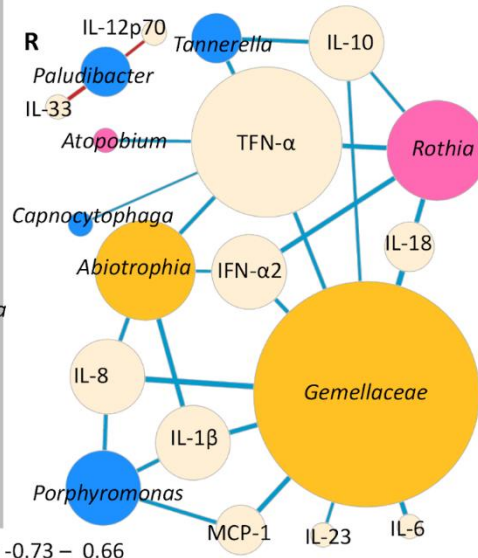

rmcorr: -0.73 – 0.66

**Impact of the disease**  
NR

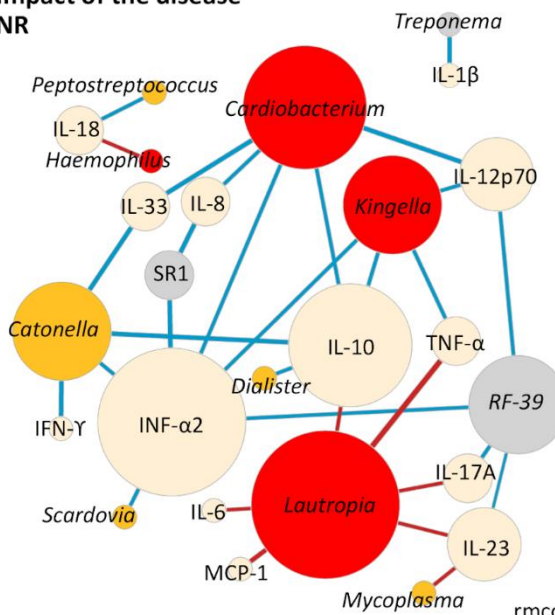

**R**

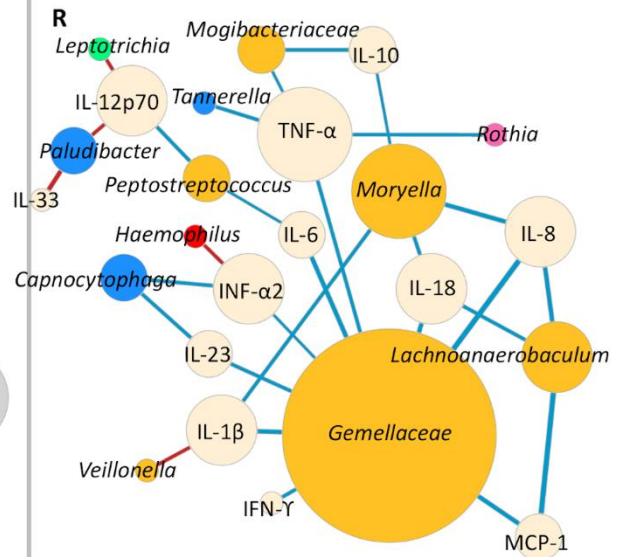

rmcorr: -0.72 – 0.63

596 **Figure 4. Responders and non-responders to dyspnoea, exercise capacity and impact of the**  
597 **disease present distinct patterns of longitudinal bacteria-inflammatory markers' correlation.**  
598 Correlation networks representing the repeated-measures correlations between bacteria and  
599 inflammatory markers in non-responders and responders to **A)** dyspnoea (rmcorr: [-0.75 –  
600 0.52]) **B)** exercise capacity (rmcorr: [-0.73 – 0.66]) and **C)** impact of the disease (rmcorr: [-0.72  
601 – 0.63]). Prior to the analysis, genera and ASVs: d0b698c7298bf04110a6d2f220879bfb and  
602 a5189f77a2cfeab3bc1602ff5c8ac3e9 relative frequencies were transformed with arcsine  
603 square root transformation and inflammatory markers' concentration was transformed with  
604  $\log_{10}$ . The diameter of the nodes is proportional to the number of connections. Bacterial nodes  
605 are coloured with the colour code of each bacterial phyla (Firmicutes: yellow, Bacteroidetes:  
606 blue; Proteobacteria: red; Fusobacteria: green Actinobacteria: pink; Other phyla: grey).  
607 Inflammatory markers' nodes are represented in beige. Positive correlations are represented in  
608 red, while negative correlations are represented in blue. The width of edges is proportional to  
609 the correlation coefficient.

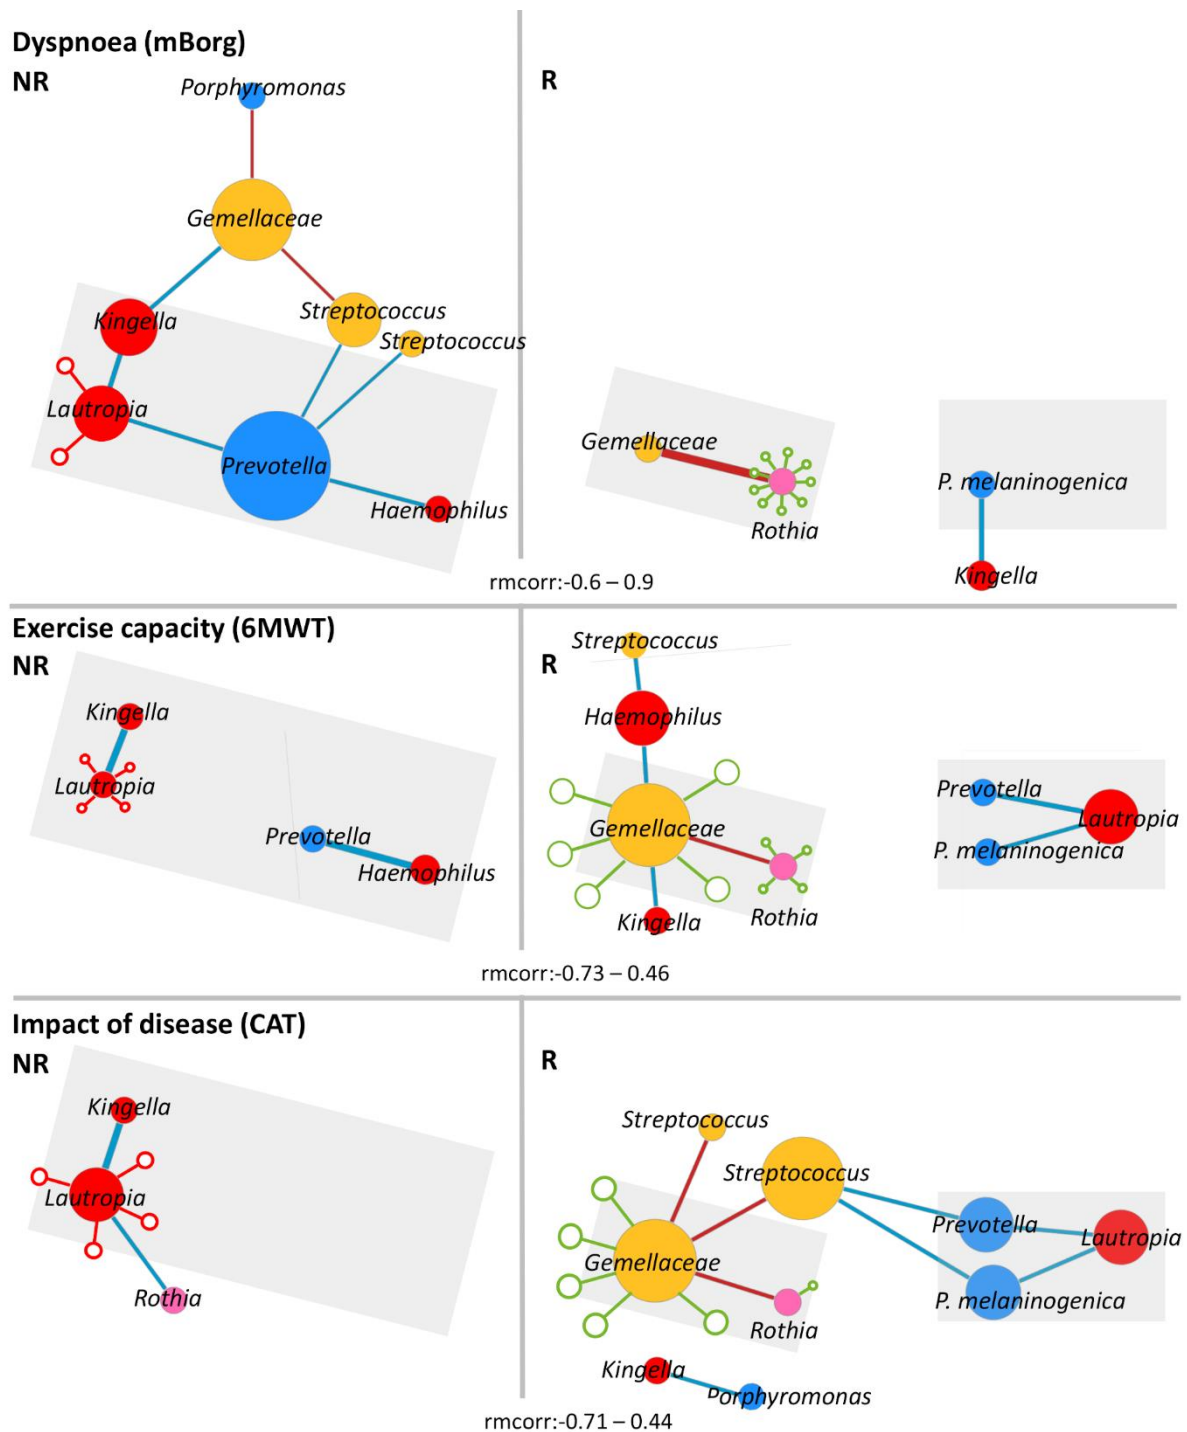

610

611 **Figure 5. Responders and non-responders to dyspnoea, exercise capacity and impact of the**  
 612 **disease present distinct patterns of longitudinal bacteria-bacteria correlation.** Correlation  
 613 networks representing the longitudinal correlations between a subset of bacterial genera and  
 614 ASVs: d0b698c7298bf04110a6d2f220879bfb and a5189f77a2cfeab3bc1602ff5c8ac3e9 non-  
 615 responders and responders to **A) dyspnoea** (rmcorr: [-0.6 – 0.9]), **B) exercise capacity** (rmcorr: [-



616 0.73 – 0.46]), and **C**) impact of the disease (rmcorr: [-0.71 – 0.44]). Grey triangles highlight  
617 common patterns of bacterial correlations between domains. Empty blue and red circles  
618 represent cytokines with which the correspondent taxon negatively and positively correlates,  
619 respectively. These correlations were inferred through the correlation analysis between  
620 bacteria-inflammatory markers and are represented here to facilitate the interpretation of the  
621 bacteria-bacteria correlation network.

622 Prior to the analysis, genera and ASVs: *d0b698c7298bf04110a6d2f220879bfb* and  
623 *a5189f77a2cfeab3bc1602ff5c8ac3e9* relative frequencies were transformed with arcsine  
624 square root transformation. The diameter of the nodes is proportional to the number of  
625 connections. Bacterial nodes were coloured according to the colour code of each bacterial phyla  
626 (Firmicutes: yellow, Bacteroidetes: blue; Proteobacteria: red; Fusobacteria: green  
627 Actinobacteria: pink; Other phyla: grey). Positive correlations were represented in red, while  
628 negative correlations were represented in blue. The width of edges is proportional to the  
629 correlation coefficient.

630

631

## SUPPLEMENTARY MATERIAL

### 632 **Methods**

#### 633 **Participants and sample collection**

634 The pulmonary rehabilitation (PR) program was composed by twice a week 60-minute sessions  
635 of moderate exercise training and psychoeducational sessions once every other week. Detailed  
636 description of the PR program can be found elsewhere [1]. Patients were followed monthly for  
637 5 consecutive months. Thirty-eight patients undertook a 12-week community-based PR  
638 program, intervention group, and the remaining 38 integrated the control group. In intervention  
639 group the time frame encompasses 1 month before PR, 3 months during PR and 2 months after  
640 PR. The PR program was delivered by a multidisciplinary team of healthcare professionals.  
641 During this period sociodemographic, anthropometric, clinical data were collected at M0 and  
642 M3 (corresponding to pre-post intervention) and saliva samples (monthly, passive drool  
643 method) were collected using a structured protocol [1].

644 Sociodemographic (age, sex, educational level), anthropometric (weight and height to compute  
645 body mass index), clinical (smoking habits, number of exacerbations and hospitalizations in the  
646 past year, past 3 months and past month, medication used, long-term oxygen, comorbidities -  
647 Charlson Comorbidity Index [2], level of airway obstruction-spirometry (FEV<sub>1</sub>, FVC, FEV<sub>1</sub>pp)  
648 (MicroLab 3535, CareFusion, Kent, UK) [3,4], medication including long term oxygen therapy,  
649 impact of the disease – COPD Assessment Test (CAT) [5,6], exercise capacity – six-minute walk  
650 test (6MWT) [7,8] data were collected following a published structured protocol of the team [1].

651 Dyspnoea at rest was assessed with the modified Borg Scale (mBorg) which is a 10-item scale.  
652 GOLD grades were defined according to FEV1 percentage predicted for each individual. GOLD  
653 groups were defined combining the number of exacerbations and hospital admissions of each  
654 patient in the year before enrolment with their CAT scores. From the initially predicted 456  
655 samples a total of 418 saliva samples were collected, the number of samples collected per group

656 and timepoint can be found in supplementary table 1. That is, our study has a 9% rate of missing  
657 saliva samples, particularly in the last timepoints M4 and M5. This can be largely explained by  
658 difficulties in reaching patients and keeping them motivated to collaborate in data collection for  
659 a long period.

#### 660 *Response to PR*

661 Response/non-response to PR was determined with the published minimal clinical importance  
662 differences (MCIDs) for the modified Borg scale-Dyspnoea (mBorg), 6MWT and COPD  
663 assessment test (CAT) were: -1 point [9] , 25m [10] and -2 points [11], respectively.

#### 664 *DNA extraction*

665 Prior to DNA extraction, samples were thawed at room temperature and centrifuged at 10,000xg  
666 for 10 minutes. Supernatants were saved for subsequent quantification of inflammatory  
667 markers and pellets were used for DNA extraction following QIAamp DNA Mini Kit (Qiagen,  
668 Hilden, Germany) protocol with minor modifications: initial sample volume was set to 400µL and  
669 the volumes of buffers and Qiagen protease were adjusted. Elution volume was reduced to a  
670 quarter of the recommended. Thirty-eight negative controls where saliva was replaced by  
671 phosphate-buffered saline were performed in order to control for background bacterial  
672 contamination. Quality and quantity of the extracted DNA was assessed in Denovix DS-11  
673 spectrophotometer, with OD260/280 and OD260/230 ratios.

#### 674 *16S rRNA gene amplification and sequencing*

675 16S rRNA gene amplification and sequencing was carried out at the Gene Expression Unit from  
676 Instituto Gulbenkian de Ciência following the implemented protocol. Briefly, for each sample,  
677 the hypervariable V4 region of 16S rRNA gene was amplified, using universal pair of primers  
678 F515 (5'-CACGGTCGKCGGCCATT-3') / R806 (5'-GGACTACHVGGGTWTCTAAT-3'). Samples  
679 were then pair-end-sequenced on an Illumina MiSeq Benchtop Sequencer, following Illumina  
680 recommendations.

## 681 [Quantification of inflammatory markers in saliva samples](#)

682 The bead assay LEGENDplex™ Human Inflammation Panel 1 (13-plex) with V-bottom Plate  
683 (BioLegend, San Diego, CA, USA), previously used successfully with saliva samples [12,13], was  
684 used to quantify inflammatory markers (IL-1 $\beta$ , IFN- $\alpha$ 2, IFN- $\gamma$ , TNF- $\alpha$ , MCP-1, IL-6, IL-8, IL-10, IL-  
685 12p70, IL-17A, IL-18, IL-23, and IL-33) in oral samples from intervention and control groups..  
686 Specifically, the supernatants obtained after sample centrifugation for 10 min at 10.000g, from  
687 the intervention (at baseline (M0), after 1 month of PR (M1), and after 3 months of PR (M3))  
688 and control groups (in the timepoints M0, M1 and M3), were used for cytokine quantification  
689 following manufacturer's recommendations [14]. Data acquisition was performed with BD  
690 Accuri™ C6 Plus flow cytometer and analysed with online version of LEGENDplex™ Data  
691 Analysis Software Suite [14]. For values below the detection limit an estimate was obtained  
692 using the standard curve. For values above the threshold of detection, the value corresponding  
693 to the maximum detection limit was used to replace cytokine values.

## 694 [Microbiota, inflammatory markers, and statistical analyses](#)

### 695 [Sample characterisation \(relative to Table 1\)](#)

696 Descriptive statistics was used to characterize clinical date of intervention and control groups at  
697 baseline. Data normality was assessed with Shapiro-Wilk and D'Agostino-Pearson omnibus  
698 normality tests, ensuring the assumptions of parametric statistics approach. Comparisons  
699 between intervention and control group were conducted with unpaired t-test with Welch's  
700 correction, when quantitative data followed normal distribution, Mann-Whitney U-test, when  
701 quantitative data violated the assumptions of parametric tests and Chi-square test, when  
702 qualitative data was considered (statistical analyses were performed in GraphPad Prism 8 [15]  
703 and R software v 3.6.1 [16]). Statistical significance was considered for p-values below 0.05.

### 704 [Analysis of illumina paired-end reads](#)

705 QIIME2 2020.8 [11,17] was used to perform microbiota analyses. Demultiplexed 16s paired-end  
706 sequences were imported and q2-vsearch plugin [18] was applied to join forward and reverse  
707 reads. Quality control was assessed via q-score base filtering, chimera removing and 16S-  
708 denoising with Deblur [19,20]. Next, to exclude bacterial background contaminations, we used  
709 the *DECONTAM* package [21,22] from *R* software [16] with the prevalence method and a  
710 threshold of 0.5, meaning that ASVs were classified as contaminants if present in a higher  
711 fraction of negative controls than true samples. This allowed us to identify 235 contaminant  
712 ASVs (available in supplementary file 2), that together with ASVs from *mitochondria*,  
713 *chloroplasts* and *cyanobacteria* were removed from the dataset prior to conducting subsequent  
714 analyses. Results from previous steps were summarized in a feature table. Q2-phylogeny plugin  
715 [23] was next employed to produce a MAFFT alignment [24] of ASVs which was later used to  
716 construct a rooted phylogeny with FastTree2 [25] for subsequent applications.

717 Taxonomy assignment of ASVs was performed with q2-feature-classifier plugin [26,27], through  
718 classify-sklearn method with pre-trained Naïve Bayes classifier against 99%-eHOMD\_v15.1  
719 reference database [28] (sequences trimmed to only include 250bp of V4 region, bound by the  
720 F515/R806 primer pair).

721 Categorized samples' metadata used for analyses is supplied in supplementary file 3.  
722 Subsequent analyses were performed upon ASVs. Differential abundance analyses were  
723 conducted with on both ASVs and OTUs at taxonomic level 6.

#### 724 *Diversity analyses*

725 Alpha- and beta-diversities were estimated with q2-diversity plugin [29] after rarefaction to  
726 8000 sequences per sample (subsample without replacement). Spatial dissimilarities between  
727 bacterial communities of different groups and/or periods were assessed with principal  
728 coordinate analyses (PCoA) and biplots based on Weighted Unifrac distance. Wilcoxon test and  
729 Friedman's test with Dunn's correction were employed to compare alpha diversity among

730 groups, periods and/or timepoints (statistical analyses were performed in *GraphPad Prism 8* [15]  
731 and *R stats* package [30] from *R* software [16]). Statistical significance was considered for p-  
732 values below 0.05.

733 Differences in beta-diversity between groups, periods and/or time points were quantified by  
734 permutational multivariate analysis of variance (PERMANOVA) [31] conducted with *adonis2*  
735 function [32] (*vegan* package [33] from *R* software [16]). For all statistical analyses a p-value of  
736  $\leq 0.05$ , corrected for multiple testing whenever necessary, was considered statistically  
737 significant.

#### 738 *Differential abundance analyses of OTUs*

739 Analysis of composition of microbiomes (ANCOM) [34] and Linear discriminant effect size (LEfSe)  
740 analysis [35] were performed to identify differentially abundant OTUs between groups, periods  
741 and/or time points. LEfSe is an algorithm for high-dimensional biomarker discovery that uses  
742 linear discriminant analysis to estimate the effect size of each taxon and does not account for  
743 the compositional nature of the microbiota. ANCOM uses a log ratio analysis to make point  
744 estimates of the variance and mean, taking into consideration the compositional nature of the  
745 data. These analyses were conducted with the feature table collapsed at genus taxonomic level  
746 (L6). LEfSe was performed in the online version [36] with an Linear Discriminant Analysis score  
747 of 3 for significance. ANCOM was performed in *R* software with *ANCOM 2.0* script [37] with  
748 taxa-wise multiple correction and a W cut-off of significance of 0.7, both recommended by the  
749 developer, based on simulation data.

#### 750 *Longitudinal analyses (linear mixed-effects models)*

- 751 • *Longitudinal differential abundance analyses of OTUs with ANCOM II*

752 Longitudinal differential abundance analyses were carried out between patients undergoing PR  
753 and controls, or R and NR to exercise capacity, dyspnoea and impact of the disease, with analysis  
754 of composition of microbiomes (ANCOM II) [38]. Similar to classic ANCOM, ANCOM II uses a log

755 ratio analysis to make point estimates of the variance and mean [39], taking into consideration  
756 the compositional nature of the data, but comprises an additional step to deal with different  
757 types of zeros, which was further described by Kaul et al [38]. These analyses were conducted  
758 with the feature table collapsed at genus taxonomic level (L6) as well as with the feature table  
759 not collapsed, e.g., using only ASVs. ANCOM II was performed in R software [16] using ANCOM  
760 2.1 script [40] with taxa-wise multiple correction and a W cut-off of 0.7 significance (both  
761 recommended by the developer, based on simulation data).

762 • *Data normalization and transformation*

763 To evaluate the global rate of change of beta diversity of patients undergoing PR and controls,  
764 all the timepoints of both groups were normalized through subtraction of baseline values.

765 • Differences in the longitudinal dynamics of OTUs/ASVs' frequencies between groups  
766 and between R and NR to exercise capacity, dyspnoea, and impact of the disease were  
767 assessed based on the arcsine square root transformed relative frequencies in each  
768 timepoint. Additionally, raw data was filtered so that the analysis included only  
769 ASVs/OTUs that were present in  $\geq 20\%$  of the samples. *Loess Lines*

770 Loess Lines plots were produced to observe dissimilar tendencies during the 5 consecutive  
771 months (M0 to M5) of the study between patients undergoing PR and controls or R and NR to  
772 exercise capacity, dyspnoea and impact of the disease. In brief, Loess regressions were fitted  
773 over longitudinal data beta-diversity and ASVs/OTUs' relative frequencies and then plotted with  
774 ggplot2 package from R software [16].

775 • *Linear mixed-effects models*

776 Longitudinal analyses with linear mixed-effects models, were performed to compare the  
777 longitudinal dynamics of beta- diversity (Weighted Unifrac distances) and relative frequencies  
778 of genera and 4 ASVs (top 4 ASVs responsible for patients' separation in principal coordinate  
779 analysis), between patients undergoing PR and controls. Differences in the longitudinal

780 trajectories of genera/ASVs' relative frequencies between R and NR to exercise capacity,  
781 dyspnoea and impact of the disease were also evaluated. Regarding the models for beta  
782 diversity, independent variables included the timepoints (5 months) and the experimental  
783 design groups (intervention and control). Subjects were incorporated in the model as random  
784 factors, using *lmer* function of the *lme4* package [41] of R software [16]. P-values were obtained  
785 using the *Anova* function from *R-stats* package [30] and statistically significant results were  
786 considered valid if the assumptions of the model were validated.

787 To assess the effect of PR in the dynamics of each OTU/ASVs, the arcsine square root  
788 transformed frequencies of each OTU/ASV were defined as dependent variable in the  
789 correspondent model. Moreover, the experimental design groups (intervention and control or  
790 R and NR to exercise capacity, dyspnoea and impact of the disease) and timepoints were set as  
791 independent variables. Subjects were adjusted as a random factor. P-values were obtained using  
792 the *Anova* function and statistically significant results were considered valid if the assumptions  
793 of the model were validated. Additionally, contrast analysis with the Bonferroni correction was  
794 executed to identify the timepoints in which the mean abundance of relevant OTUs/ASVs is  
795 significantly different between R and NR to the several domains. Statistical significance was  
796 considered for p-values below 0.05.

#### 797 *Analyses of inflammatory markers*

798 To assess changes of each inflammatory marker, the ratio between each timepoint and the  
799 baseline (M1/M0 and M3/M0) was estimated. Wilcoxon Signed-Ranks Test (GraphPad Prism 8)  
800 with post-hoc false discovery rate (FDR) correction from multiple comparisons was applied to  
801 compare ratios at M1 and M3 to baseline in all experimental groups. Mann-Whitney U-test was  
802 used to assess the differences in the median ratio of each inflammatory marker per time-point  
803 (M1 vs M1 and M3 vs M3, respectively), among the experimental groups. Z-test for variance  
804 (*PairedData* package [42] from R software [16]) were executed to assess differences in the



805 variance of ratios of each inflammatory marker per time-point (M1 vs M1 and M3 vs M3,  
806 respectively), among the experimental groups. Statistical significance was considered for  $p$ -  
807 values below 0.05.

#### 808 *Repeated Measures Correlations*

809 Repeated measures correlations were performed to assess the longitudinal co-variation of the  
810 frequency of genera/ASVs and inflammatory markers during PR, in the groups of R and NR to  
811 exercise capacity, dyspnoea and impact of the disease. Correlations were computed with *Rmcorr*  
812 function from *rmcorr* package [43] (R software [16]). Prior to correlation analyses, estimated  
813 values of inflammatory markers were transformed with  $\log_{10}$  transformation, OTUs list was  
814 filtered to consider only OTUs that were present in at least 20% of the samples. Furthermore,  
815 the filtered dataset was transformed with arcsine square root transformation. Patients with only  
816 two longitudinal measurements, M0 and M3, were also included in the analyses. Statistical  
817 significance was considered for  $p$ -values below 0.05, however results were only accepted as  
818 valid if the assumptions of the *rmcorr* model were validated (namely, model residuals normally  
819 distributed and centered in zero). Valid correlations, according to previous criteria, were then  
820 plotted in correlation network plots with *igraph* package ([44] from R software [16], with node  
821 diameter proportional to the number of correlations and the edges' width proportional to the  
822 correlation strength.

823 The same analysis (including timepoints M0, M1 and M3) with a subset of bacterial genera and  
824 ASVs was carried out to assess bacterial interactions that could be related with PR  
825 responsiveness. Since compositional data is intrinsically correlated the subgroup of bacterial  
826 genera/ASVs included the major hubs found in the correlation between bacteria and  
827 inflammatory markers (*Lautropia*, *Rothia*, *Gemellaceae* and *Kingella*) and six other oral taxa  
828 previously associated with severity [45] (*Prevotella*, *P. melaninogenica*, *Streptococcus*,  
829 *Streptococcus* sp., *Haemophilus* and *Porphyromonas*).

830 **Supplementary Tables**

831 **Supplementary Table 1** – Number of saliva samples collected per group in each timepoint over  
832 the 5-month period.

| Time-points | Intervention<br>(n=38) | Control<br>(n=38) |     |
|-------------|------------------------|-------------------|-----|
| M0          | 38                     | 38                |     |
| M1          | 37                     | 38                |     |
| M2          | 38                     | 38                |     |
| M3          | 37                     | 38                |     |
| M4          | 22                     | 38                |     |
| M5          | 18                     | 38                |     |
| Total       | 190                    | 228               | 418 |

833

834 **Supplementary Table 2** – Variance of the global rate of change estimated for each cytokine at  
835 M1 and M3 in the intervention and control groups. Z-test for variance was performed to  
836 assess significant differences between the groups.

| Time-point | Cytokine        | Intervention<br>(n=26) | Control (n=28) | test's<br>statistics | <i>p-value</i> |
|------------|-----------------|------------------------|----------------|----------------------|----------------|
| M1         | IL-1 $\beta$    | 89.5                   | 2.5            | 36.1                 | <0.0001        |
|            | IFN- $\alpha$ 2 | 149.0                  | 0.2            | 743.2                | <0.0001        |
|            | IFN- $\gamma$   | 92.4                   | 2.7            | 34.4                 | <0.0001        |
|            | TNF- $\alpha$   | 220.3                  | 2.0            | 111.4                | <0.0001        |
|            | MCP-1           | 1242.3                 | 3.5            | 357.2                | <0.0001        |
|            | IL-6            | 1214.6                 | 5.8            | 210.3                | <0.0001        |
|            | IL-8            | 1796.4                 | 3.5            | 517.0                | <0.0001        |
|            | IL-10           | 126.0                  | 2.0            | 63.3                 | <0.0001        |
|            | IL-12p70        | 3.6                    | 2.6            | 1.4                  | 0.4            |
|            | IL-17A          | 12.5                   | 0.3            | 45.9                 | <0.0001        |
|            | IL-18           | 25885.7                | 0.9            | 28096.0              | <0.0001        |
|            | IL-23           | 180.8                  | 1.4            | 130.2                | <0.0001        |
| IL-33      | 3.1             | 0.5                    | 5.9            | <0.0001              |                |
| M3         | IL-1 $\beta$    | 29.2                   | 3.0            | 9.8                  | <0.0001        |
|            | IFN- $\alpha$ 2 | 19.3                   | 0.1            | 151.9                | <0.0001        |
|            | IFN- $\gamma$   | 61.3                   | 0.4            | 152.8                | <0.0001        |
|            | TNF- $\alpha$   | 3867.6                 | 3.7            | 1050.3               | <0.0001        |
|            | MCP-1           | 6062.1                 | 737803.0       | 0.008                | <0.0001        |
|            | IL-6            | 828.6                  | 47.7           | 17.4                 | <0.0001        |
|            | IL-8            | 1002.9                 | 208.3          | 4.8                  | 0.0001         |
|            | IL-10           | 2248.1                 | 1085998.9      | 0.002                | <0.0001        |
| IL-12p70   | 5.6             | 0.6                    | 9.5            | <0.0001              |                |
| IL-17A     | 28.0            | 0.3                    | 97.2           | <0.0001              |                |

|       |        |       |        |         |
|-------|--------|-------|--------|---------|
| IL-18 | 9716.7 | 3.5   | 2750.1 | <0.0001 |
| IL-23 | 87.0   | 652.1 | 0.1    | <0.0001 |
| IL-33 | 2.2    | 0.2   | 13.7   | <0.0001 |

*p-values were obtained with Z-test for variance*

837

838 **Supplementary Table 3** – Summary of the effects of pulmonary rehabilitation in people with  
839 chronic obstructive pulmonary disease (n=38)

| Clinical Parameters        | mean Pre<br>(n=38) | SD    | mean Post<br>(n=38) | SD    | p-value | Mean<br>Difference | Cohen's D |
|----------------------------|--------------------|-------|---------------------|-------|---------|--------------------|-----------|
| BMI                        | 26.03              | 4.3   | 25.8                | 4.1   | 0.07    | -0.28              | 0.31      |
| mBorg                      | 0.79               | 1.2   | 1.1                 | 1.7   | 0.5     | 0.28               | 0.18      |
| CAT                        | 17.08              | 8.03  | 13.5                | 7.4   | 0.001   | -3.6               | 0.46      |
| 6MWT: walked distance in m | 389                | 132.2 | 434.4               | 134.2 | 0.0006  | 45.4               | 0.34      |

BMI: Body Mass Index; mBorg: modified Borg Scale of Dyspnoea; CAT: COPD assessment test; 6MWT: six-minute walk test

840 **Supplementary Table 4** – Variance of the global rate of change estimated for each cytokine at  
841 M1 and M3 in R and NR to dyspnoea (mBorg). Z-test for variance was performed to assess  
842 significant differences between R and NR.

| Time-point | Cytokine        | NR<br>(n=19) | R (n=7) | test's<br>statistics | <i>p-value</i> |
|------------|-----------------|--------------|---------|----------------------|----------------|
| M1         | IL-1 $\beta$    | 98.6         | 76.4    | 0.8                  | 0.8            |
|            | IFN- $\alpha$ 2 | 202.9        | 1.3     | 0.006                | <0.0001        |
|            | IFN- $\gamma$   | 123.4        | 3.0     | 0.02                 | 0.0002         |
|            | TNF- $\alpha$   | 290.7        | 12.4    | 0.04                 | 0.0008         |
|            | MCP-1           | 10.3         | 4627.5  | 447.5                | <0.0001        |
|            | IL-6            | 203.6        | 4113.9  | 20.2                 | <0.0001        |
|            | IL-8            | 16.1         | 6696.4  | 416.0                | <0.0001        |
|            | IL-10           | 163.9        | 10.0    | 0.06                 | 0.002          |
|            | IL-12p70        | 4.6          | 0.2     | 0.05                 | 0.001          |
|            | IL-17A          | 16.5         | 0.3     | 0.02                 | <0.0001        |
|            | IL-18           | 1436.0       | 94746.6 | 66.0                 | <0.0001        |
|            | IL-23           | 245.6        | 1.4     | 0.006                | <0.0001        |
| IL-33      | 3.8             | 1.1          | 0.3     | 0.14                 |                |
| 344M3      | IL-1 $\beta$    | 20.2         | 53.2    | 2.6                  | 0.1            |
|            | IFN- $\alpha$ 2 | 24.0         | 8.1     | 0.3                  | 0.18           |
|            | IFN- $\gamma$   | 18.2         | 161.6   | 8.9                  | 0.0003         |
|            | TNF- $\alpha$   | 5239.5       | 329.0   | 0.06                 | 0.003          |
|            | MCP-1           | 2.9          | 22412.2 | 7796.1               | <0.0001        |
|            | IL-6            | 1108.1       | 128.0   | 0.1                  | 0.013          |

|          |        |         |       |         |
|----------|--------|---------|-------|---------|
| IL-8     | 10.1   | 3717.1  | 367.9 | <0.0001 |
| IL-10    | 2999.4 | 369.2   | 0.1   | 0.02    |
| IL-12p70 | 6.6    | 3.4     | 0.5   | 0.42    |
| IL-17A   | 32.4   | 18.3    | 0.6   | 0.49    |
| IL-18    | 4862.1 | 24570.4 | 5.1   | 0.007   |
| IL-23    | 29.7   | 227.1   | 7.6   | 0.0007  |
| IL-33    | 2.5    | 1.9     | 0.8   | 0.79    |

*p-values were obtained with Z-test for variance*

843

844 **Supplementary Table 5** – Variance of the global rate of change estimated for each cytokine at  
845 M1 and M3 in R and NR to exercise capacity (6MWT). Z-test for variance was performed to  
846 assess significant differences between R and NR.

| Time-point | Cytokine        | NR<br>(n=10) | R<br>(n=16) | test's<br>statistics | <i>p-value</i> |
|------------|-----------------|--------------|-------------|----------------------|----------------|
| M1         | IL-1 $\beta$    | 99.9         | 88.9        | 0.9                  | 0.81           |
|            | IFN- $\alpha$ 2 | 382.1        | 2.9         | 0.008                | <0.0001        |
|            | IFN- $\gamma$   | 199.1        | 27.8        | 0.1                  | 0.001          |
|            | TNF- $\alpha$   | 491.3        | 19.1        | 0.04                 | <0.0001        |
|            | MCP-1           | 17.9         | 2024.1      | 113.0                | <0.0001        |
|            | IL-6            | 349.4        | 1811.8      | 5.2                  | 0.017          |
|            | IL-8            | 29.7         | 2918.0      | 98.3                 | <0.0001        |
|            | IL-10           | 263.4        | 7.3         | 0.03                 | <0.0001        |
|            | IL-12p70        | 7.2          | 1.1         | 0.15                 | 0.002          |
|            | IL-17A          | 29.5         | 1.4         | 0.05                 | <0.0001        |
|            | IL-18           | 2534.3       | 41015.4     | 16.2                 | 0.0002         |
|            | IL-23           | 467.2        | 1.9         | 0.004                | <0.0001        |
| IL-33      | 5.3             | 1.7          | 0.3         | 0.054                |                |
| M3         | IL-1 $\beta$    | 35.3         | 27.3        | 0.8                  | 0.63           |
|            | IFN- $\alpha$ 2 | 47.7         | 1.0         | 0.02                 | <0.0001        |
|            | IFN- $\gamma$   | 53.6         | 68.5        | 1.3                  | 0.73           |
|            | TNF- $\alpha$   | 9730.2       | 15.3        | 0.002                | <0.0001        |
|            | MCP-1           | 5.1          | 9858.5      | 1918.8               | <0.0001        |
|            | IL-6            | 2081.7       | 26.6        | 0.01                 | <0.0001        |
|            | IL-8            | 17.3         | 1632.1      | 94.3                 | <0.0001        |
|            | IL-10           | 5630.9       | 100.1       | 0.02                 | <0.0001        |
|            | IL-12p70        | 5.5          | 6.0         | 1.1                  | 0.93           |
|            | IL-17A          | 65.1         | 4.7         | 0.07                 | <0.0001        |
|            | IL-18           | 9209.6       | 10663.3     | 1.2                  | 0.85           |
|            | IL-23           | 189.6        | 23.9        | 0.1                  | 0.0005         |
| IL-33      | 2.9             | 2.0          | 0.7         | 0.47                 |                |

*p-values were obtained with Z-test for variance*

847

848 **Supplementary Table 6** – Variance of the global rate of change estimated for each cytokine at  
849 M1 and M3 in R and NR to the impact of disease (CAT). Z-test for variance was performed to  
850 assess significant differences between R and NR.

| Time-point | Cytokine        | NR<br>(n=12) | R<br>(n=14) | test's<br>statistics | <i>p-value</i> |
|------------|-----------------|--------------|-------------|----------------------|----------------|
| M1         | IL-1 $\beta$    | 47.3         | 131.1       | 2.8                  | 0.099          |
|            | IFN- $\alpha$ 2 | 1.0          | 276.3       | 287.0                | <0.0001        |
|            | IFN- $\gamma$   | 3.0          | 168.7       | 56.2                 | <0.0001        |
|            | TNF- $\alpha$   | 19.0         | 385.9       | 20.3                 | <0.0001        |
|            | MCP-1           | 2692.6       | 14.0        | 0.005                | <0.0001        |
|            | IL-6            | 2401.8       | 232.5       | 0.1                  | 0.0002         |
|            | IL-8            | 3883.9       | 22.1        | 0.006                | <0.0001        |
|            | IL-10           | 40.3         | 105.9       | 5.1                  | 0.01           |
|            | IL-12p70        | 0.9          | 6.1         | 6.4                  | 0.004          |
|            | IL-17A          | 0.5          | 22.5        | 45.2                 | <0.0001        |
|            | IL-18           | 54805.0      | 1964.3      | 0.04                 | <0.0001        |
|            | IL-23           | 2.1          | 337.0       | 164.2                | <0.0001        |
|            | IL-33           | 1.9          | 4.4         | 2.4                  | 0.16           |
| M3         | IL-1 $\beta$    | 33.0         | 27.7        | 0.8                  | 0.76           |
|            | IFN- $\alpha$ 2 | 5.6          | 32.0        | 5.7                  | 0.007          |
|            | IFN- $\gamma$   | 31.5         | 90.9        | 2.9                  | 0.09           |
|            | TNF- $\alpha$   | 227.0        | 7097.8      | 31.3                 | <0.0001        |
|            | MCP-1           | 13133.7      | 3.5         | 0.0003               | <0.0001        |
|            | IL-6            | 90.2         | 1473.0      | 16.3                 | <0.0001        |
|            | IL-8            | 2174.3       | 13.2        | 0.006                | <0.0001        |
|            | IL-10           | 160.9        | 4086.2      | 25.4                 | <0.0001        |
|            | IL-12p70        | 5.1          | 6.4         | 1.3                  | 0.71           |
|            | IL-17A          | 9.1          | 45.5        | 5.0                  | 0.01           |
|            | IL-18           | 14073.7      | 6639.2      | 0.5                  | 0.2            |
|            | IL-23           | 124.2        | 61.6        | 0.5                  | 0.23           |
|            | IL-33           | 2.8          | 1.9         | 0.7                  | 0.48           |

*p-values* were obtained with Z-test for variance

851

852 **Supplementary Figures**

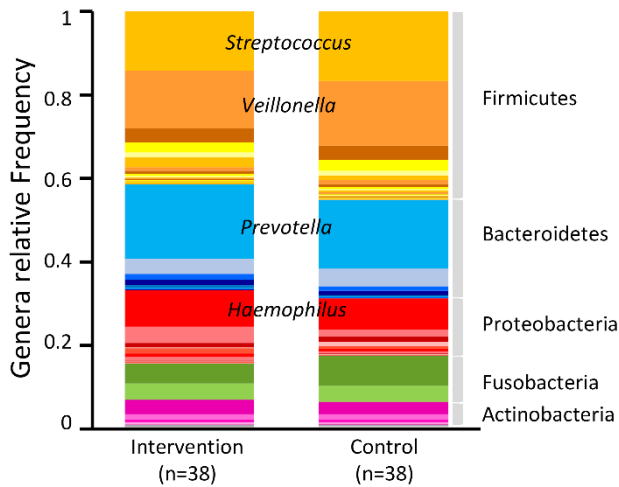

854 **Supplementary Figure 1. Mean frequency of phyla and genera of bacteria present in**  
 855 **intervention and control groups at baseline (M0).**

856

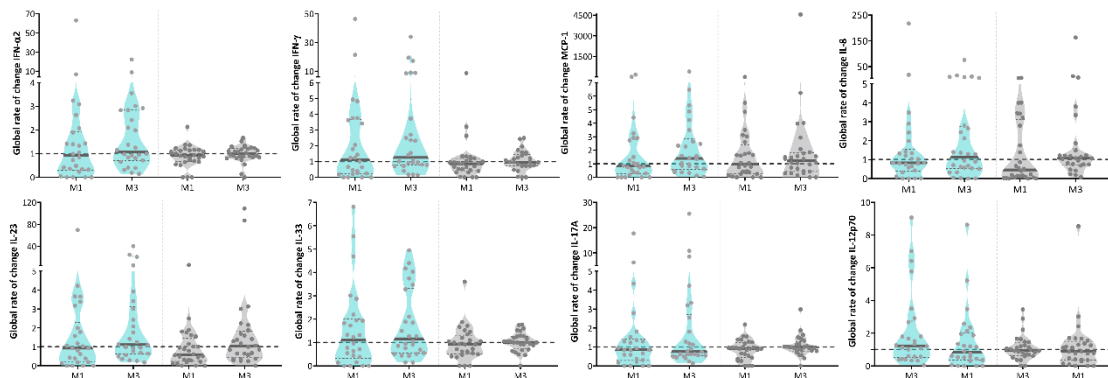

858 **Supplementary Figure 2. Violin plots representing the global rate of change of IFN- $\alpha$ 2, IFN- $\gamma$ ,**  
 859 **MCP-1, IL-8, IL-23, IL-33, IL-17A, IL-18 and IL-12p70 in saliva from patients submitted to the 12-**  
 860 **week pulmonary rehabilitation programme (blue) and controls (grey). Global rate of change**  
 861 **represents the ratio between cytokine values measured at baseline and M1 or M3 (i.e. M1/M0**  
 862 **and M3/M0). Differences between M1 and the baseline and between M3 and the baseline were**  
 863 **assessed by Wilcoxon signed-rank, in each group (intervention (blue) and control (grey)).**

864 Differences between groups at M1 and M3 were assessed by Mann-Whitney U-test. According  
865 to these criteria no significant shifts were observed for the cytokines represented in the figure.

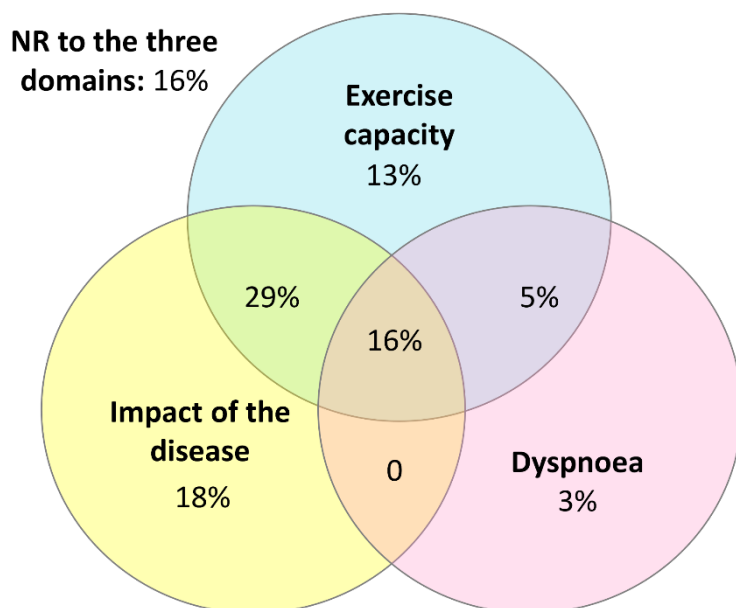

866

867 **Supplementary Figure 3.** Venn diagram showing the percentage of overlap between patients'  
868 (n=38) responsiveness to each domain: dyspnoea, exercise capacity and impact of the disease.

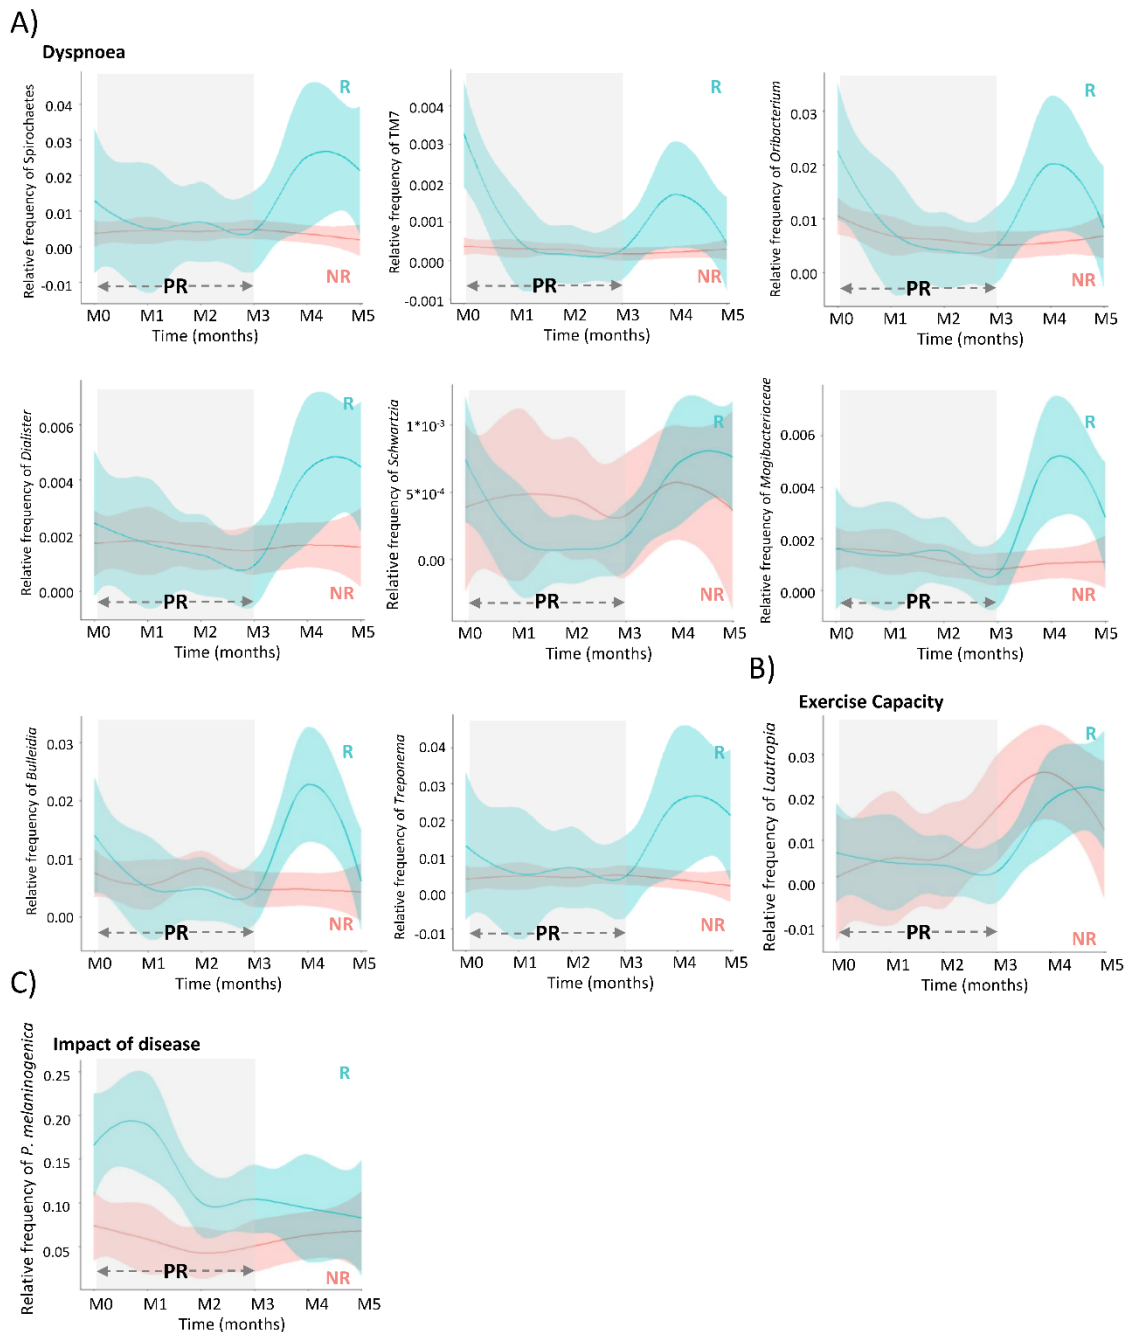

869

870 **Supplementary Figure 4. Relative frequencies over time of taxa presenting significantly**  
 871 **different dynamics between responders and non-responders.** Linear mixed-effects models  
 872 were applied to arcsine square root transformed frequencies of ASVs/OTUs to determine the  
 873 taxa presenting differential dynamics between R and NR to A) dyspnoea during exercise, B)  
 874 exercise capacity and C) impact of the disease. Grey rectangles include all the time-points where  
 875 patients were under pulmonary rehabilitation. Blue and red loess lines were fitted over the data  
 876 points representing the relative frequency of the correspondent taxon in responders and non-



877 responders (M0=immediately prior to PR; M1, M2, M3= 1,2,3 months after initiating PR; M4,  
878 M5=1 and 2 months after terminating PR). The blue and red areas represent the 0.95 confidence  
879 intervals.

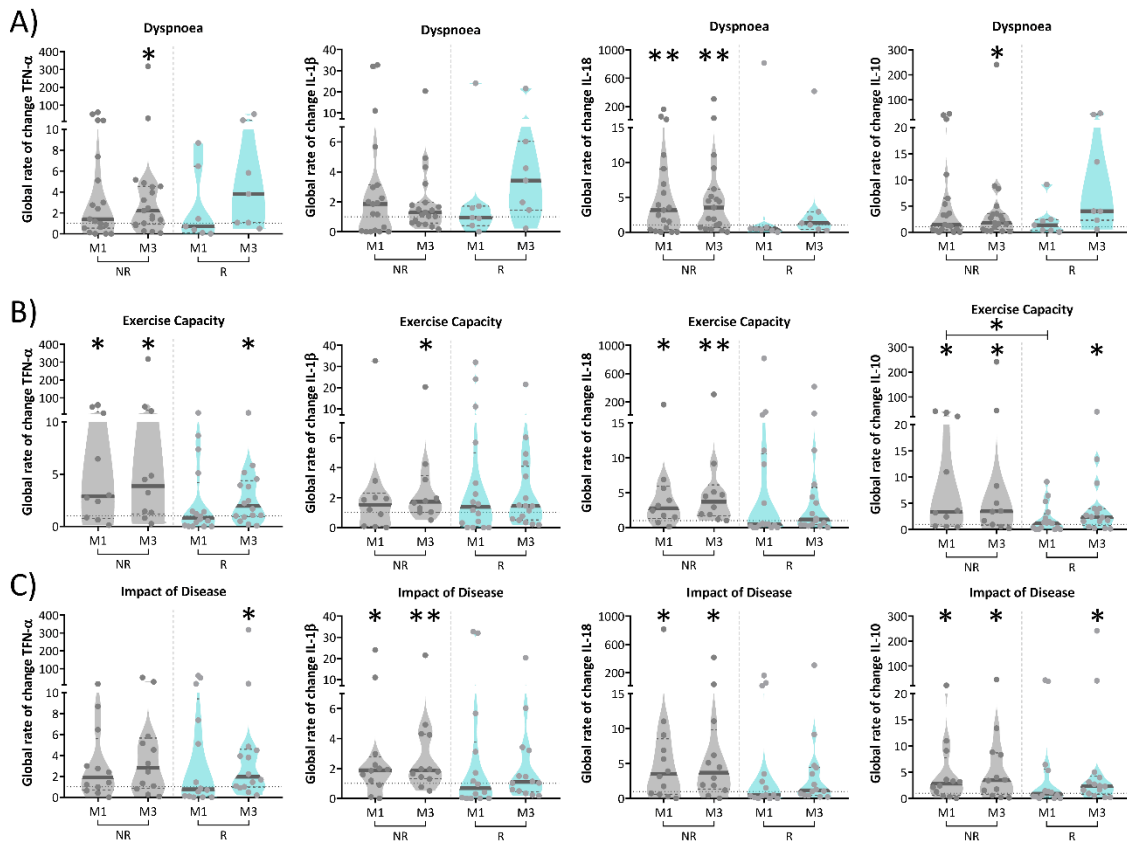

880

881 **Supplementary Figure 5. Responsiveness to pulmonary rehabilitation (PR) was associated**  
882 **with specific alterations in the inflammatory markers.** Global rate of change represents the  
883 ratio between cytokine values measured at baseline and M1 or M3 (*i.e.* M1/M0 and M3/M0).  
884 Differences between M1 and the baseline and between M3 and the baseline were assessed by  
885 Wilcoxon signed-rank, in each group (intervention (blue) and control (grey)). Differences  
886 between groups (R and NR) at M1 and M3 were assessed by Mann-Whitney U-test. \* $p < 0.05$ ,  
887 \*\* $p < 0.01$ , \*\*\* $p < 0.001$ . A) dyspnoea during exercise, B) exercise capacity and C) impact of the  
888 disease.

**A) Dyspnoea**

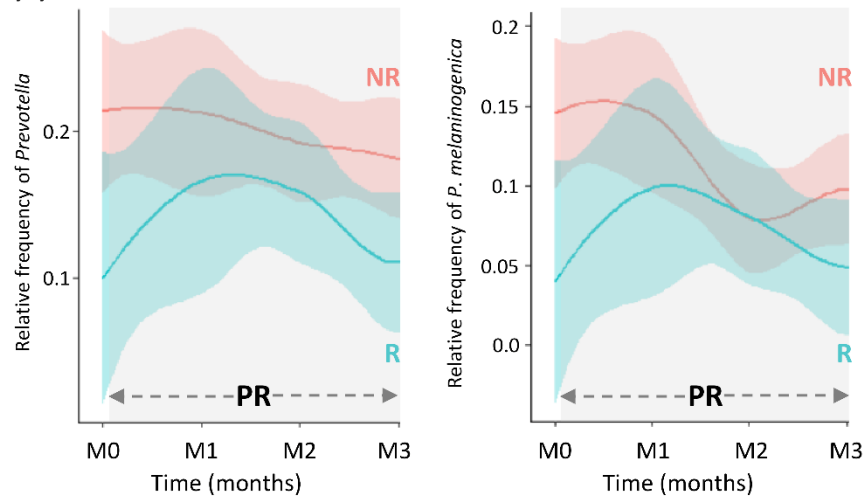

**B) Exercise Capacity**

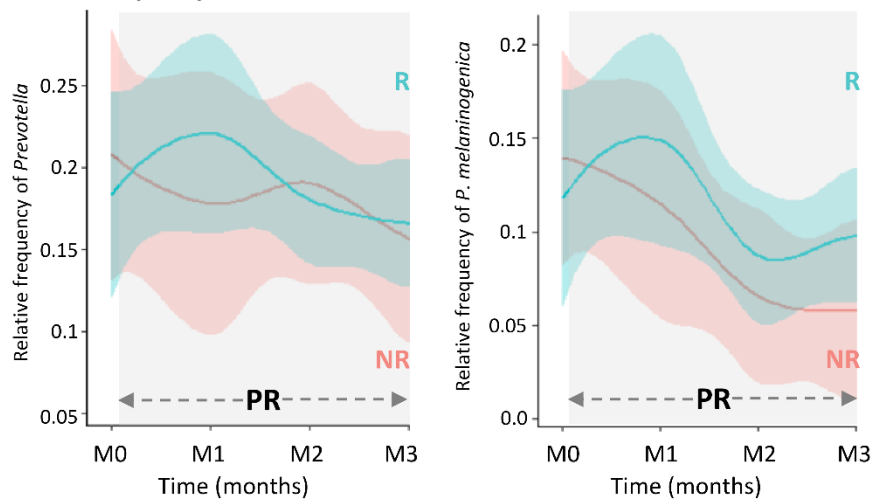

**C) Impact of the disease**

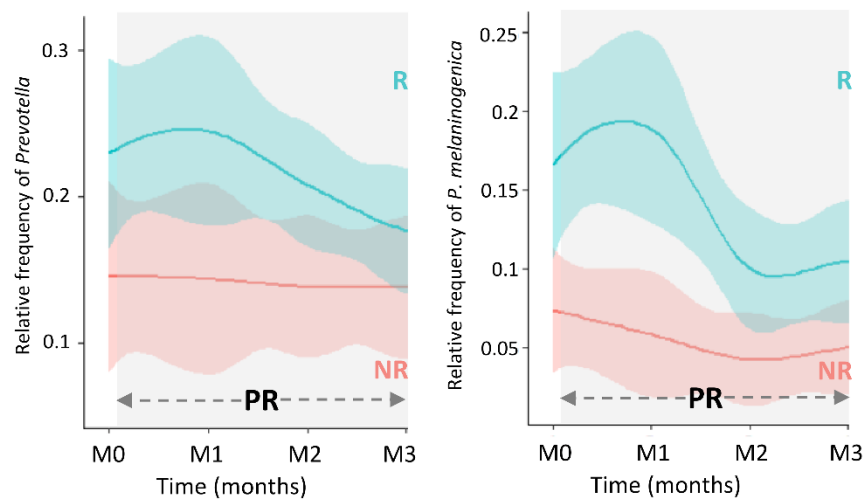

890 **Supplementary Figure 6. Frequency of *Prevotella* and *P. melaninogenica* over time in**  
891 **responders and non-responders to A) dyspnoea, B) exercise capacity and C) impact of the**  
892 **disease.** The grey rectangles include all the time-points where patients were under pulmonary  
893 rehabilitation. Blue and red loess lines were fitted over the data points representing the relative  
894 frequency of the correspondent taxon in responders and non-responders (M0=immediately  
895 prior to PR; M1, M2, M3= 1,2,3 months after initiating PR). The blue and red areas represent the  
896 0.95 confidence intervals.

## 897 [Code for data analyses](#)

### 898 [Qiime2 v20.8](#)

899 The scripts provided were constructed based on the complete dataset, appropriate selection  
900 of samples was performed for analyses considering specific time-points and groups of patients  
901 with the command: “*Filter samples*”

### 902 [Sequencing data import using prepared manifest file:](#)

```
903 qiime tools import \  
904 --type 'SampleData[PairedEndSequencesWithQuality]' \  
905 --input-path pe-33-manifest.tsv \  
906 --output-path paired-end-demux.qza \  
907 --input-format PairedEndFastqManifestPhred33
```

### 908 [Joining of the read pairs, and quality assessment:](#)

```
909 qiime vsearch join-pairs \  
910 --p-allowmergestagger \  
911 --i-demultiplexed-seqs paired-end-demux.qza \  
912 --o-joined-sequences demux-joined.qza \  
913 qiime demux summarize \  
914 --i-data demux-joined.qza \  
915 --o-visualization demux-joined.qzv \  
916 qiime quality-filter q-score \  
917 --i-demux demux-joined.qza \  
918 --o-filtered-sequences demux-joined-filtered.qza \  
919 --o-filter-stats demux-joined-filter-stats.qza
```

### 920 [Denoising with Deblur and statistics visualization:](#)

```
921 qiime deblur denoise-16S \  
922 --i-demultiplexed-seqs demux-joined-filtered.qza \  
923 --p-trim-length 250 \  
924 --p-sample-stats \  
925 --o-representative-sequences rep-seqs.qza \  
926 --o-table table.qza \  
927 --o-stats deblur-stats.qza \  
928 qiime feature-table summarize \  
929 --i-table table.qza \  
930 --o-visualization table.qzv \  
931 --m-sample-metadata-file sample-metadata.tsv
```

```
932 qiime feature-table tabulate-seqs \  
933 --i-data rep-seqs.qza \  
934 --o-visualization rep-seqs.qzv  
935 qiime deblur visualize-stats \  
936 --i-deblur-stats deblur-stats.qza \  
937 --o-visualization deblur-stats.qzv
```

### 938 *Filtering data to remove contaminant ASVs found with DECONTAM:*

```
939 qiime feature-table filter-features \  
940 --i-table table.qza \  
941 --m-metadata-file features-to-keep.txt \  
942 --o-filtered-table filt-table.qza  
943 qiime feature-table filter-seqs \  
944 --i-data rep-seqs.qza \  
945 --i-table filt-table.qza \  
946 --o-filtered-data filt-rep-seqs.qza
```

### 947 *Extract eHOMD\_15.1 reference sequences according to primers and sequence length, train* 948 *Naïve-bayes classifier and preform taxonomy assignment:*

```
949 #Extract reference sequences  
950 qiime tools import \  
951 --type 'FeatureData[Sequence]' \  
952 --input-path HOMD_16S_rRNA_RefSeq_V15.1.p9.fasta \  
953 --output-path HOMD_otus.qza  
954 qiime tools import \  
955 --type 'FeatureData[Taxonomy]' \  
956 --input-format HeaderlessTSVTaxonomyFormat \  
957 --input-path HOMD_16S_rRNA_RefSeq_V15.1.qiime.taxonomy \  
958 --output-path ref-taxonomy.qza  
959 qiime feature-classifier extract-reads \  
960 --i-sequences HOMD_otus.qza \  
961 --p-f-primer GTGCCAGCMGCCGCGGTAA \  
962 --p-r-primer GGACTACHVGGGTWTCTAAT \  
963 --p-trunc-len 250 \  
964 --p-min-length 100 \  
965 --p-max-length 400 \  
966 --o-reads ref-seqs.qza  
967 #Train the Naïve-bayes classifier  
968 qiime feature-classifier fit-classifier-naive-bayes \  
969 --i-reference-reads ref-seqs.qza \  
970 --i-reference-taxonomy HOMD_taxonomy.qza \  
971 --o-classifier classifier.qza  
972 #Taxonomy assignment  
973 qiime feature-classifier classify-sklearn \  
974 --i-classifier HOMD_classifier.qza \  
975 --i-reads rep-seqs.qza \  
976 --o-classification taxonomy.qza  
977 qiime feature-classifier classify-sklearn \  
978 --i-classifier HOMD_classifier.qza \  
979 --i-reads filt-rep-seqs.qza \  
980 --o-classification filt-taxonomy.qza
```

### 981 *Filter samples (e.g. analyses conducted only at M0):*

```
982 qiime feature-table filter-samples \  
983 --i-table filt-table.qza \  
984 --m-metadata-file samples-to-keep_M0.txt \  
985 --o-filtered-table M0-table.qza
```

### 986 *Sequences alignment and generation of a rooted tree for phylogenetic diversity analyses:*

```
987 qiime phylogeny align-to-tree-mafft-fasttree \  
988 --i-sequences filt-rep-seqs.qza \  
989 --o-alignment aligned-rep-seqs.qza \  
990 --o-masked-alignment masked-aligned-rep-seqs.qza \  
991 --o-tree unrooted-tree.qza \  
992 --o-rooted-tree rooted-tree.qza
```

#### 993 *Rarefaction and alpha and beta diversity analyses:*

```
994 #Alpha-rarefaction  
995 qiime diversity alpha-rarefaction \  
996 --i-table filt-table.qza \  
997 --i-phylogeny rooted-tree.qza \  
998 --p-max-depth 20000 \  
999 --m-metadata-file sample-metadata.tsv \  
1000 --o-visualization alpha-rarefaction.qzv  
1001 #Diversity analyses  
1002 qiime diversity core-metrics-phylogenetic \  
1003 --i-phylogeny rooted-tree.qza \  
1004 --i-table filt-table.qza \  
1005 --p-sampling-depth 8000 \  
1006 --m-metadata-file sample-metadata.tsv \  
1007 --output-dir core-metrics-results
```

#### 1008 *Calculation of ASVs relative abundances:*

```
1009 qiime feature-table relative-frequency \  
1010 --i-table filt-table.qza \  
1011 --o-relative-frequency-table freq-table.qza
```

#### 1012 *From PCoAs to Biplots:*

```
1013 qiime diversity pcoa \  
1014 --i-distance-matrix core-metrics-results/weighted_unifrac_distance_matrix.qza \  
1015 --p-number-of-dimensions 2 \  
1016 --o-pcoa weighted_unifrac_2dpcoa_results.qza  
1017 qiime diversity pcoa-biplot \  
1018 --i-pcoa weighted_unifrac_2dpcoa_results.qza \  
1019 --i-features freq-table.qza \  
1020 --o-biplot 2D-weighted_unifrac_biplot_pcoa_results.qza  
1021 qiime emperor biplot \  
1022 --i-biplot 2D-weighted_unifrac_biplot_pcoa_results.qza \  
1023 --m-sample-metadata-file sample-metadata.tsv \  
1024 --m-feature-metadata-file filt-taxonomy.qza \  
1025 --p-ignore-missing-samples \  
1026 --p-number-of-features 3 \  
1027 --o-visualization 2D-3-biplot_wU.qzv
```

#### 1028 *Taxonomy collapse to genera (L6) level and genera relative abundances calculation:*

```
1029 #taxa collapse  
1030 qiime taxa collapse \  
1031 --i-table filt-table.qza \  
1032 --i-taxonomy filt-taxonomy.qza \  
1033 --p-level 6 \  
1034 --o-collapsed-table collapsed-filtered-table-l6.qza  
1035 #Abundance calculation  
1036 qiime feature-table relative-frequency \  
1037 --i-table collapsed-filtered-table-l6.qza \  
1038 --o-relative-frequency-table collapsed-frequency-filtered-table-l6.qza
```

1039 *Exporting ASVs' table, genera table, genera relative abundance table, alpha-diversity vectors and*  
1040 *beta-diversity matrixes:*

```
1041 #Exporting the ASVs' table, nr of reads and abundance
1042 qiime tools export \
1043 --input-path filt-table.qza \
1044 --output-path abs-table-ASVs
1045 qiime tools export \
1046 --input-path freq-table.qza \
1047 --output-path rel-table-ASVs
1048 #Exporting the genera table, nr of reads and abundance
1049 qiime tools export \
1050 --input-path collapsed-filtered-table-l6.qza \
1051 --output-path abs-table-L6
1052 qiime tools export \
1053 --input-path collapsed-frequency-filtered-table-l6.qza \
1054 --output-path rel-table-L6
1055 #Converting biom 2.0 table into .txt for lefse
1056 biom convert -i feature-table.biom -o otu_table_rel_l6.tsv --to-tsv --header-key taxonomy
1057 #Exporting alpha diversity vectors
1058 qiime tools extract \
1059 --input-path core-metrics-results/shannon_vector.qza \
1060 --output-path extracted-shannon
1061 qiime tools extract \
1062 --input-path core-metrics-results/faith_pd_vector.qza \
1063 --output-path extracted-faith
1064 #Exporting beta-diversity matrixes
1065 qiime tools extract \
1066 --input-path core-metrics-results/weighted_unifrac_distance_matrix.qza \
1067 --output-path extracted-wu
```

1068 **R software**

1069 **DECONTAM:**

```
1070 library(tidyverse)
1071 library(qiime2R)
1072 library(phyloseq)
1073 library(ggplot2)
1074 library(decontam)
1075 ?isContaminant
1076 phy<-qza_to_phyloseq(features="E:/PRISMA-final!/PRISMA - SARA/R decontam/table.qza", metadata="E:/PRISMA-final!/PRISMA -
1077 SARA/R decontam/sample-metadata.txt", taxonomy="E:/PRISMA-final!/PRISMA - SARA/R decontam/taxonomy.qza", tmp="C:/tmp
1078 ")
1079 head(sample_data(phy))
1080 df <- as.data.frame(sample_data(phy))
1081 df$LibrarySize <- sample_sums(phy)
1082 df <- df[order(df$LibrarySize),]
1083 df$Index <- seq(nrow(df))
1084 ggplot(data=df, aes(x=Index, y=LibrarySize, color=Sample_or_Control)) + geom_point()
1085
1086 ###identify contaminants - prevalence
1087 sample_data(phy)$is.neg <- sample_data(phy)$Sample_or_Control == "Control"
1088 contamdf.prev <- isContaminant(phy, method="prevalence", neg="is.neg")
1089 table((contamdf.prev)$contaminant)
1090 head(which(contamdf.prev$contaminant))
1091 head(which(contamdf.prev))
1092 show(contamdf.prev)
1093
1094 contamdf.prev05 <- isContaminant(phy, method="prevalence", neg="is.neg", batch.combine="minimum", threshold=0.5, normaliz
1095 e=TRUE )
1096 table(contamdf.prev05$contaminant)
1097 table(contamdf.prev05)
1098 show(contamdf.prev05)
1099
```

```
1100 # Make phyloseq object of presence-absence in negative controls and true samples
1101 phy.pa <- transform_sample_counts(phy, function(abund) 1*(abund>0))
1102 phy.pa.neg <- prune_samples(sample_data(phy.pa)$Sample_or_Control == "Control", phy.pa)
1103 phy.pa.pos <- prune_samples(sample_data(phy.pa)$Sample_or_Control == "Sample", phy.pa)
1104
1105 # Make data.frame of prevalence in positive and negative samples
1106 df.pa <- data.frame(pa.pos=taxa_sums(phy.pa.pos), pa.neg=taxa_sums(phy.pa.neg),
1107   contaminant=contamdf.prev$contaminant)
1108 ggplot(data=df.pa, aes(x=pa.neg, y=pa.pos, color=contaminant)) + geom_point() +
1109   xlab("Prevalence (Negative Controls)") + ylab("Prevalence (True Samples)")
1110 #write table
1111 write.table(contamdf.prev05, "E:/PRISMA-final!/PRISMA - SARA/R decontam/contamdf.prev0.5.txt", sep="\t")
```

## 1112 *PcOA and PERMANOVA (example M0 RvsNR to mBorg):*

```
1113 library(qiime2R)
1114 library(phyloseq)
1115 library(ggplot2)
1116 library(vegan)
1117 library(readxl)
1118 library(ggordiplots)
1119 library(ggthemes)
1120 library(ggfortify)
1121
1122 wuM0=read.table(file = 'M0distance-matrix.tsv', sep = '\t', header = TRUE)
1123 wuM0_1<- wuM0[,-1]
1124 rownames(wuM0_1)<-wuM0[,1]
1125 phy<-qza_to_phyloseq(features="D:/PRISMA-final!/PcOA spider/table-M0.qza", metadata="D:/PRISMA-final!/PcOA spider/sample-
1126 metadata.tsv", taxonomy="D:/PRISMA-final!/PcOA spider/taxonomy.qza", tree="D:/PRISMA-final!/PcOA spider/rooted-tree.qza", t
1127 mp="C:/tmp")
1128 head(sample_data(phy))
1129 phy
1130 sampledf <- data.frame(sample_data(phy))
1131 PcoA_wU <- cmdscale(wuM0_1, eig = TRUE)
1132 gg_ordiplot(PcoA_wU, groups = sampledf$RBMSD, spiders = TRUE, ellipse = FALSE)
1133 phy_group <- get_variable(phy, "RmBorg")
1134 wu_mBorg<- adonis2(wuM0_1 ~ RmBorg, data = sampledf, method = "wunifrac", by=NULL, permutations = 999)
1135 print(wu_mBorg)
```

## 1136 *ANCOM 2.1 (Intervention vs Control, longitudinal comparison):*

```
1137 library(readr)
1138 library(tidyverse)
1139 library(nlme)
1140 library(dplyr)
1141 library(ggplot2)
1142 library(compositions)
1143
1144 # OTU table should be a matrix/data.frame with each feature in rows and sample in columns.
1145 # Metadata should be a matrix/data.frame containing the sample identifier.
1146
1147 # Data Pre-Processing
1148 feature_table_pre_process = function(feature_table, meta_data, sample_var, group_var = NULL,
1149   out_cut = 0.05, zero_cut = 0.90, lib_cut, neg_lb){
1150   feature_table = data.frame(feature_table, check.names = FALSE)
1151   meta_data = data.frame(meta_data, check.names = FALSE)
1152   # Drop unused levels
1153   meta_data[] = lapply(meta_data, function(x) if(is.factor(x)) factor(x) else x)
1154   # Match sample IDs between metadata and feature table
1155   sample_ID = intersect(meta_data[, sample_var], colnames(feature_table))
1156   feature_table = feature_table[, sample_ID]
1157   meta_data = meta_data[match(sample_ID, meta_data[, sample_var]), ]
1158
1159   # 1. Identify outliers within each taxon
1160   if (!is.null(group_var)) {
1161     group = meta_data[, group_var]
1162     z = feature_table + 1 # Add pseudo-count (1)
1163     f = log(z); f[f == 0] = NA; f = colMeans(f, na.rm = T)
1164     f_fit = lm(f ~ group)
1165     e = rep(0, length(f)); e[!is.na(group)] = residuals(f_fit)
1166     y = t(t(z) - e)
```

```
1167 outlier_check = function(x){
1168 # Fitting the mixture model using the algorithm of Peddada, S. Das, and JT Gene Hwang (2002)
1169 mu1 = quantile(x, 0.25, na.rm = T); mu2 = quantile(x, 0.75, na.rm = T)
1170 sigma1 = quantile(x, 0.75, na.rm = T) - quantile(x, 0.25, na.rm = T); sigma2 = sigma1
1171 pi = 0.75
1172 n = length(x)
1173 epsilon = 100
1174 tol = 1e-5
1175 score = pi*dnorm(x, mean = mu1, sd = sigma1)/((1 - pi)*dnorm(x, mean = mu2, sd = sigma2))
1176 while (epsilon > tol) {
1177   grp1_ind = (score >= 1)
1178   mu1_new = mean(x[grp1_ind]); mu2_new = mean(x[!grp1_ind])
1179   sigma1_new = sd(x[grp1_ind]); if(is.na(sigma1_new)) sigma1_new = 0
1180   sigma2_new = sd(x[!grp1_ind]); if(is.na(sigma2_new)) sigma2_new = 0
1181   pi_new = sum(grp1_ind)/n
1182
1183   para = c(mu1_new, mu2_new, sigma1_new, sigma2_new, pi_new)
1184   if(any(is.na(para))) break
1185
1186   score = pi_new * dnorm(x, mean = mu1_new, sd = sigma1_new)/
1187     ((1-pi_new) * dnorm(x, mean = mu2_new, sd = sigma2_new))
1188
1189   epsilon = sqrt((mu1 - mu1_new)^2 + (mu2 - mu2_new)^2 +
1190     (sigma1 - sigma1_new)^2 + (sigma2 - sigma2_new)^2 + (pi - pi_new)^2)
1191   mu1 = mu1_new; mu2 = mu2_new; sigma1 = sigma1_new; sigma2 = sigma2_new; pi = pi_new
1192 }
1193
1194 if(mu1 + 1.96 * sigma1 < mu2 - 1.96 * sigma2){
1195   if(pi < out_cut){
1196     out_ind = grp1_ind
1197   }else if(pi > 1 - out_cut){
1198     out_ind = (!grp1_ind)
1199   }else{
1200     out_ind = rep(FALSE, n)
1201   }
1202 }else{
1203   out_ind = rep(FALSE, n)
1204 }
1205 return(out_ind)
1206 }
1207 out_ind = matrix(FALSE, nrow = nrow(feature_table), ncol = ncol(feature_table))
1208 out_ind[, !is.na(group)] = t(apply(y, 1, function(i)
1209   unlist(tapply(i, group, function(j) outlier_check(j)))))
1210
1211 feature_table[out_ind] = NA
1212 }
1213
1214 # 2. Discard taxa with zeros >= zero_cut
1215 zero_prop = apply(feature_table, 1, function(x) sum(x == 0, na.rm = T)/length(x[!is.na(x)]))
1216 taxa_del = which(zero_prop >= zero_cut)
1217 if(length(taxa_del) > 0){
1218   feature_table = feature_table[- taxa_del, ]
1219 }
1220
1221 # 3. Discard samples with library size < lib_cut
1222 lib_size = colSums(feature_table, na.rm = T)
1223 if(any(lib_size < lib_cut)){
1224   subj_del = which(lib_size < lib_cut)
1225   feature_table = feature_table[, - subj_del]
1226   meta_data = meta_data[- subj_del, ]
1227 }
1228
1229 # 4. Identify taxa with structure zeros
1230 if (!is.null(group_var)) {
1231   group = factor(meta_data[, group_var])
1232   present_table = as.matrix(feature_table)
1233   present_table[is.na(present_table)] = 0
1234   present_table[present_table != 0] = 1
1235 }
1236
1237 p_hat = t(apply(present_table, 1, function(x)
```



```
1238   unlist(tapply(x, group, function(y) mean(y, na.rm = T))))))
1239   samp_size = t(apply(feature_table, 1, function(x)
1240     unlist(tapply(x, group, function(y) length(y[!is.na(y)]))))))
1241   p_hat_lo = p_hat - 1.96 * sqrt(p_hat * (1 - p_hat)/samp_size)
1242
1243   struc_zero = (p_hat == 0) * 1
1244   # Whether we need to classify a taxon into structural zero by its negative lower bound?
1245   if(neg_lb) struc_zero[p_hat_lo <= 0] = 1
1246
1247   # Entries considered to be structural zeros are set to be 0s
1248   struc_ind = struc_zero[, group]
1249   feature_table = feature_table * (1 - struc_ind)
1250
1251   colnames(struc_zero) = paste0("structural_zero (", colnames(struc_zero), ")")
1252 }else{
1253   struc_zero = NULL
1254 }
1255
1256 # 5. Return results
1257 res = list(feature_table = feature_table, meta_data = meta_data, structure_zeros = struc_zero)
1258 return(res)
1259 }
1260
1261 # ANCOM main function
1262 ANCOM = function(feature_table, meta_data, struc_zero = NULL, main_var, p_adj_method = "BH",
1263   alpha = 0.05, adj_formula = NULL, rand_formula = NULL, ...){
1264   # OTU table transformation:
1265   # (1) Discard taxa with structural zeros (if any); (2) Add pseudocount (1) and take logarithm.
1266   if (!is.null(struc_zero)) {
1267     num_struc_zero = apply(struc_zero, 1, sum)
1268     comp_table = feature_table[num_struc_zero == 0, ]
1269   }else{
1270     comp_table = feature_table
1271   }
1272   comp_table = log(as.matrix(comp_table) + 1)
1273   n_taxa = dim(comp_table)[1]
1274   taxa_id = rownames(comp_table)
1275   n_samp = dim(comp_table)[2]
1276
1277   # Determine the type of statistical test and its formula.
1278   if (is.null(rand_formula) & is.null(adj_formula)) {
1279     # Basic model
1280     # Whether the main variable of interest has two levels or more?
1281     if (length(unique(meta_data%>%pull(main_var))) == 2) {
1282       # Two levels: Wilcoxon rank-sum test
1283       tfun = stats::wilcox.test
1284     } else{
1285       # More than two levels: Kruskal-Wallis test
1286       tfun = stats::kruskal.test
1287     }
1288     # Formula
1289     tformula = formula(paste("x ~", main_var, sep = " "))
1290   }else if (is.null(rand_formula) & !is.null(adj_formula)) {
1291     # Model: ANOVA
1292     tfun = stats::aov
1293     # Formula
1294     tformula = formula(paste("x ~", main_var, "+", adj_formula, sep = " "))
1295   }else if (!is.null(rand_formula)) {
1296     # Model: Mixed-effects model
1297     tfun = nlme::lme
1298     # Formula
1299     if (is.null(adj_formula)) {
1300       # Random intercept model
1301       tformula = formula(paste("x ~", main_var))
1302     }else {
1303       # Random coefficients/slope model
1304       tformula = formula(paste("x ~", main_var, "+", adj_formula))
1305     }
1306   }
1307 }
1308 # Calculate the p-value for each pairwise comparison of taxa.
```

```
1309 p_data = matrix(NA, nrow = n_taxa, ncol = n_taxa)
1310 colnames(p_data) = taxa_id
1311 rownames(p_data) = taxa_id
1312 for (i in 1:(n_taxa - 1)) {
1313   # Loop through each taxon.
1314   # For each taxon i, additive log ratio (alr) transform the OTU table using taxon i as the reference.
1315   # e.g. the first alr matrix will be the log abundance data (comp_table) recursively subtracted
1316   # by the log abundance of 1st taxon (1st column) column-wisely, and remove the first i columns since:
1317   # the first (i - 1) columns were calculated by previous iterations, and
1318   # the i^th column contains all zeros.
1319   alr_data = apply(comp_table, 1, function(x) x - comp_table[i, ])
1320   # apply(...) allows crossing the data in a number of ways and avoid explicit use of loop constructs.
1321   # Here, we basically want to iteratively subtract each column of the comp_table by its i^th column.
1322   alr_data = alr_data[, -(1:i), drop = FALSE]
1323   n_lr = dim(alr_data)[2] # number of log-ratios (lr)
1324   alr_data = cbind(alr_data, meta_data) # merge with the metadata
1325
1326   # P-values
1327   if (is.null(rand_formula) & is.null(adj_formula)) {
1328     p_data[-(1:i), i] = apply(alr_data[, 1:n_lr, drop = FALSE], 2, function(x){
1329       suppressWarnings(tfun(tformula,
1330         data = data.frame(x, alr_data,
1331           check.names = FALSE))$p.value)
1332     })
1333   }
1334   }else if (is.null(rand_formula) & !is.null(adj_formula)) {
1335     p_data[-(1:i), i] = apply(alr_data[, 1:n_lr, drop = FALSE], 2, function(x){
1336       fit = tfun(tformula,
1337         data = data.frame(x, alr_data, check.names = FALSE),
1338         na.action = na.omit)
1339       summary(fit)[[1]][main_var, "Pr(>F)"]
1340     })
1341   }
1342   }else if (!is.null(rand_formula)) {
1343     p_data[-(1:i), i] = apply(alr_data[, 1:n_lr, drop = FALSE], 2, function(x){
1344       fit = tfun(fixed = tformula,
1345         data = data.frame(x, alr_data, check.names = FALSE),
1346         random = formula(rand_formula),
1347         na.action = na.omit, ...)
1348       anova(fit)[main_var, "p-value"]
1349     })
1350   }
1351 }
1352 }
1353 # Complete the p-value matrix.
1354 # What we got from above iterations is a lower triangle matrix of p-values.
1355 p_data[upper.tri(p_data)] = t(p_data)[upper.tri(p_data)]
1356 diag(p_data) = 1 # let p-values on diagonal equal to 1
1357 p_data[is.na(p_data)] = 1 # let p-values of NA equal to 1
1358
1359 # Multiple comparisons correction.
1360 q_data = apply(p_data, 2, function(x) p.adjust(x, method = p_adj_method))
1361
1362 # Calculate the W statistic of ANCOM.
1363 # For each taxon, count the number of q-values < alpha.
1364 W = apply(q_data, 2, function(x) sum(x < alpha))
1365
1366 # Organize outputs
1367 out_comp = data.frame(taxa_id, W, row.names = NULL, check.names = FALSE)
1368 # Declare a taxon to be differentially abundant based on the quantile of W statistic.
1369 # We perform (n_taxa - 1) hypothesis testings on each taxon, so the maximum number of rejections is (n_taxa - 1).
1370 out_comp = out_comp %>% mutate(detected_0.9 = ifelse(W > 0.9 * (n_taxa - 1), TRUE, FALSE),
1371   detected_0.8 = ifelse(W > 0.8 * (n_taxa - 1), TRUE, FALSE),
1372   detected_0.7 = ifelse(W > 0.7 * (n_taxa - 1), TRUE, FALSE),
1373   detected_0.6 = ifelse(W > 0.6 * (n_taxa - 1), TRUE, FALSE))
1374
1375 # Taxa with structural zeros are automatically declared to be differentially abundant
1376 if (!is.null(struc_zero)){
1377   out = data.frame(taxa_id = rownames(struc_zero), W = Inf, detected_0.9 = TRUE,
1378     detected_0.8 = TRUE, detected_0.7 = TRUE, detected_0.6 = TRUE,
1379     row.names = NULL, check.names = FALSE)
```

```
1380   out[match(taxa_id, out$taxa_id), ] = out_comp
1381 }else{
1382   out = out_comp
1383 }
1384
1385 # Draw volcano plot
1386 # Calculate clr
1387 clr_table = apply(feature_table, 2, clr)
1388 # Calculate clr mean difference
1389 eff_size = apply(clr_table, 1, function(y)
1390   lm(y ~ x, data = data.frame(y = y,
1391     x = meta_data %>% pull(main_var),
1392     check.names = FALSE))$coef[-1])
1393
1394 if (is.matrix(eff_size)){
1395   # Data frame for the figure
1396   dat_fig = data.frame(taxa_id = out$taxa_id, t(eff_size), y = out$W, check.names = FALSE) %>%
1397     mutate(zero_ind = factor(ifelse(is.infinite(y), "Yes", "No"), levels = c("Yes", "No"))) %>%
1398     gather(key = group, value = x, rownames(eff_size))
1399   # Replace "x" to the name of covariate
1400   dat_fig$group = sapply(dat_fig$group, function(x) gsub("x", paste0(main_var, " = "), x))
1401   # Replace Inf by (n_taxa - 1) for structural zeros
1402   dat_fig$y = replace(dat_fig$y, is.infinite(dat_fig$y), n_taxa - 1)
1403
1404   fig = ggplot(data = dat_fig) + aes(x = x, y = y) +
1405     geom_point(aes(color = zero_ind)) +
1406     facet_wrap(~ group) +
1407     labs(x = "CLR mean difference", y = "W statistic") +
1408     scale_color_discrete(name = "Structural zero", drop = FALSE) +
1409     theme_bw() +
1410     theme(plot.title = element_text(hjust = 0.5), legend.position = "top",
1411       strip.background = element_rect(fill = "white"))
1412   fig
1413 } else{
1414   # Data frame for the figure
1415   dat_fig = data.frame(taxa_id = out$taxa_id, x = eff_size, y = out$W) %>%
1416     mutate(zero_ind = factor(ifelse(is.infinite(y), "Yes", "No"), levels = c("Yes", "No")))
1417   # Replace Inf by (n_taxa - 1) for structural zeros
1418   dat_fig$y = replace(dat_fig$y, is.infinite(dat_fig$y), n_taxa - 1)
1419
1420   fig = ggplot(data = dat_fig) + aes(x = x, y = y) +
1421     geom_point(aes(color = zero_ind)) +
1422     labs(x = "CLR mean difference", y = "W statistic") +
1423     scale_color_discrete(name = "Structural zero", drop = FALSE) +
1424     theme_bw() +
1425     theme(plot.title = element_text(hjust = 0.5), legend.position = "top")
1426   fig
1427 }
1428
1429 res = list(out = out, fig = fig)
1430 return(res)
1431 }
1432
1433 ###INTERVENTION vs CONTROL
1434 #importing data#
1435 otu_data = read_tsv("D:/PRISMA-final!/ANCOM 2.1/INTvsCNT.tsv", skip = 1)
1436 otu_id = otu_data$`feature-id`
1437 otu_data = data.frame(otu_data[, -1], check.names = FALSE)
1438 rownames(otu_data) = otu_id
1439
1440 meta_data = read_tsv("D:/PRISMA-final!/ANCOM 2.1/sample-metadata.tsv")[-1, ]
1441 meta_data = meta_data %>% rename(Sample.ID = `SampleID`)
1442
1443 #data processing#
1444 feature_table = otu_data; sample_var = "Sample.ID"; group_var = "Group"
1445 out_cut = 0.05; zero_cut = 0.90; lib_cut = 8000; neg_lb = TRUE
1446 prepro = feature_table_pre_process(feature_table, meta_data, sample_var, group_var,
1447   out_cut, zero_cut, lib_cut, neg_lb)
1448 feature_table = prepro$feature_table # Preprocessed feature table
1449 meta_data = prepro$meta_data # Preprocessed metadata
1450 struc_zero = prepro$structure_zeros # Structural zero info
```

```
1451 # Step 2: ANCOM
1452
1453 main_var = "Group"; p_adj_method = "fdr"; alpha = 0.05
1454 adj_formula = NULL; rand_formula = "~ 1 | Subject"
1455 control = lmeControl(maxIter = 100, msMaxIter = 100, opt = "optim")
1456 t_start = Sys.time()
1457 res = ANCOM(feature_table, meta_data, struc_zero, main_var, p_adj_method,
1458            alpha, adj_formula, rand_formula, control = control)
1459 t_end = Sys.time()
1460 t_run = t_end - t_start # around 30s
1461
1462 write_csv(res$out, "D:/PRISMA-final!/ANCOM 2.1/results_INT_CTR.csv")
1463
1464 # Step 3: Volcano Plot
1465
1466 # Number of taxa except structural zeros
1467 n_taxa = ifelse(is.null(struc_zero), nrow(feature_table), sum(apply(struc_zero, 1, sum) == 0))
1468 # Cutoff values for declaring differentially abundant taxa
1469 cut_off = c(0.9 * (n_taxa - 1), 0.8 * (n_taxa - 1), 0.7 * (n_taxa - 1), 0.6 * (n_taxa - 1))
1470 names(cut_off) = c("detected_0.9", "detected_0.8", "detected_0.7", "detected_0.6")
1471
1472 # Annotation data
1473 dat_ann = data.frame(x = min(res$fig$data$x), y = cut_off["detected_0.7"], label = "W[0.7]")
1474
1475 fig = res$fig +
1476     geom_hline(yintercept = cut_off["detected_0.7"], linetype = "dashed") +
1477     geom_text(data = dat_ann, aes(x = x, y = y, label = label),
1478             size = 4, vjust = -0.5, hjust = 0, color = "orange", parse = TRUE)
1479
1480 fig
```

1481 *Formatting beta-diversity matrix, global rate of change and Linear mixed effect model between*  
1482 *Intervention and Control groups*

```
1483 library(readr)
1484 library(readr)
1485 beta <- read_delim("weighted-unifrac-filtered-distance-matrix.tsv",
1486                 "\t", escape_double = FALSE, trim_ws = TRUE)
1487 View(beta)
1488
1489 beta=beta[,-1]
1490 rownames(beta)=colnames(beta)
1491
1492 #####
1493 ##### Matrices com os dados todos #####
1494 #####
1495
1496 #####
1497 ## M0 ##
1498 #####
1499
1500 library(tidyverse)
1501 M0=matches(c("M0"), vars=colnames(beta1))
1502
1503 betaM0=beta1[,M0]
1504 rownames(betaM0)=rownames(beta1)
1505 View(betaM0)
1506
1507 M0R=matches(c(
1508 "sample3R451M0",
1509 "sample3R452M0",
1510 "sample3R455M0",
1511 "sample508M0",
1512 "sample509M0",
1513 "sample519M0",
1514 "sample526M0",
1515 "sample527M0",
1516 "sample540M0",
1517 "sample578M0",
1518 "sample583M0",
1519 "sample649M0",
```

```
1520 "sample663M0",
1521 "sample665M0",
1522 "sample676M0",
1523 "sample678M0",
1524 "sample694M0",
1525 "sample695M0",
1526 "sample794M0",
1527 "sample795M0",
1528 "sample801M0",
1529 "sample807M0",
1530 "sample809M0",
1531 "sample830M0",
1532 "sample833M0",
1533 "sample837M0",
1534 "sample851M0",
1535 "sample880M0",
1536 "sample884M0",
1537 "sample885M0",
1538 "sample891M0",
1539 "sample897M0",
1540 "sample907M0",
1541 "sample934M0",
1542 "sample935M0",
1543 "sampleP101M0",
1544 "sampleP201M0",
1545 "sampleP204M0"), vars=colnames(betaM0))
1546
1547 betaM0=betaM0[,-MOR]
1548
1549 MOC=matches(c("sample3R451M0",
1550 "sample3R452M0",
1551 "sample3R455M0",
1552 "sample508M0",
1553 "sample509M0",
1554 "sample519M0",
1555 "sample526M0",
1556 "sample527M0",
1557 "sample540M0",
1558 "sample578M0",
1559 "sample583M0",
1560 "sample649M0",
1561 "sample663M0",
1562 "sample665M0",
1563 "sample676M0",
1564 "sample678M0",
1565 "sample694M0",
1566 "sample695M0",
1567 "sample794M0",
1568 "sample795M0",
1569 "sample801M0",
1570 "sample807M0",
1571 "sample809M0",
1572 "sample830M0",
1573 "sample833M0",
1574 "sample837M0",
1575 "sample851M0",
1576 "sample880M0",
1577 "sample884M0",
1578 "sample885M0",
1579 "sample891M0",
1580 "sample897M0",
1581 "sample907M0",
1582 "sample934M0",
1583 "sample935M0",
1584 "sampleP101M0",
1585 "sampleP201M0",
1586 "sampleP204M0"), vars=colnames(beta1))
1587
1588 betaM0=cbind(betaM0,beta1[,MOC])
1589 betaM0=as.data.frame(t(betaM0))
1590 colnames(betaM0)=colnames(beta1)
```

```
1591
1592 #Dados originais#
1593 loess.linesM0=NULL
1594
1595 for (i in 1:nrow(betaM0)) {
1596   loess.linesM0=c(loess.linesM0,betaM0[i,])
1597 }
1598
1599 loess.linesM0=as.data.frame(loess.linesM0)
1600 loess.linesM0=t(loess.linesM0)
1601
1602 TPM0=c(rep(3,length(loess.linesM0)))
1603
1604 DEM0=c(rep("I",34*381),rep("C",37*381))
1605
1606
1607 #####
1608 ## M1 ##
1609 #####
1610
1611 M1=matches(c("M1"), vars=colnames(beta1))
1612
1613 betaM1=beta1[,M1]
1614 rownames(betaM1)=rownames(beta1)
1615 View(betaM1)
1616
1617 M1R=matches(c("sample3R451M1",
1618   "sample3R452M1",
1619   "sample3R455M1",
1620   "sample508M1",
1621   "sample509M1",
1622   "sample519M1",
1623   "sample526M1",
1624   "sample527M1",
1625   "sample540M1",
1626   "sample578M1",
1627   "sample583M1",
1628   "sample649M1",
1629   "sample663M1",
1630   "sample665M1",
1631   "sample676M1",
1632   "sample678M1",
1633   "sample694M1",
1634   "sample695M1",
1635   "sample794M1",
1636   "sample795M1",
1637   "sample801M1",
1638   "sample807M1",
1639   "sample809M1",
1640   "sample830M1",
1641   "sample833M1",
1642   "sample837M1",
1643   "sample851M1",
1644   "sample880M1",
1645   "sample884M1",
1646   "sample885M1",
1647   "sample891M1",
1648   "sample897M1",
1649   "sample907M1",
1650   "sample934M1",
1651   "sample935M1",
1652   "sampleP101M1",
1653   "sampleP201M1",
1654   "sampleP204M1"), vars=colnames(betaM1))
1655
1656 betaM1=betaM1[,-M1R]
1657
1658 M1C=matches(c("sample3R451M1",
1659   "sample3R452M1",
1660   "sample3R455M1",
1661   "sample508M1",
```

```
1662 "sample509M1",
1663 "sample519M1",
1664 "sample526M1",
1665 "sample527M1",
1666 "sample540M1",
1667 "sample578M1",
1668 "sample583M1",
1669 "sample649M1",
1670 "sample663M1",
1671 "sample665M1",
1672 "sample676M1",
1673 "sample678M1",
1674 "sample694M1",
1675 "sample695M1",
1676 "sample794M1",
1677 "sample795M1",
1678 "sample801M1",
1679 "sample807M1",
1680 "sample809M1",
1681 "sample830M1",
1682 "sample833M1",
1683 "sample837M1",
1684 "sample851M1",
1685 "sample880M1",
1686 "sample884M1",
1687 "sample885M1",
1688 "sample891M1",
1689 "sample897M1",
1690 "sample907M1",
1691 "sample934M1",
1692 "sample935M1",
1693 "sampleP101M1",
1694 "sampleP201M1",
1695 "sampleP204M1"), vars=colnames(beta1))
1696
1697 betaM1=cbind(betaM1,beta1[,M1C])
1698 betaM1=as.data.frame(t(betaM1))
1699 colnames(betaM1)=colnames(beta1)
1700
1701 #Dados originais#
1702 loess.linesM1=NULL
1703
1704 for (i in 1:nrow(betaM1)) {
1705   loess.linesM1=c(loess.linesM1,betaM1[i,])
1706 }
1707
1708 loess.linesM1=as.data.frame(loess.linesM1)
1709 loess.linesM1=t(loess.linesM1)
1710
1711 TPM1=c(rep(4,length(loess.linesM1)))
1712
1713 DEM1=c(rep("I",34*381),rep("C",34*381))
1714
1715
1716 #####
1717 ## M2 ##
1718 #####
1719
1720 M2=matches(c("M2"), vars=colnames(beta1))
1721
1722 betaM2=beta1[,M2]
1723 rownames(betaM2)=rownames(beta1)
1724 View(betaM2)
1725
1726 M2R=matches(c("sample3R451M2",
1727 "sample3R452M2",
1728 "sample3R455M2",
1729 "sample508M2",
1730 "sample509M2",
1731 "sample519M2",
1732 "sample526M2",
```

```
1733 "sample527M2",
1734 "sample540M2",
1735 "sample578M2",
1736 "sample583M2",
1737 "sample649M2",
1738 "sample663M2",
1739 "sample665M2",
1740 "sample676M2",
1741 "sample678M2",
1742 "sample694M2",
1743 "sample695M2",
1744 "sample794M2",
1745 "sample795M2",
1746 "sample801M2",
1747 "sample807M2",
1748 "sample809M2",
1749 "sample830M2",
1750 "sample833M2",
1751 "sample837M2",
1752 "sample851M2",
1753 "sample880M2",
1754 "sample884M2",
1755 "sample885M2",
1756 "sample891M2",
1757 "sample897M2",
1758 "sample907M2",
1759 "sample934M2",
1760 "sample935M2",
1761 "sampleP101M2",
1762 "sampleP201M2",
1763 "sampleP204M2"), vars=colnames(betaM2))
1764
1765 betaM2=betaM2[,-M2R]
1766
1767 M2C=matches(c("sample3R451M2",
1768 "sample3R452M2",
1769 "sample3R455M2",
1770 "sample508M2",
1771 "sample509M2",
1772 "sample519M2",
1773 "sample526M2",
1774 "sample527M2",
1775 "sample540M2",
1776 "sample578M2",
1777 "sample583M2",
1778 "sample649M2",
1779 "sample663M2",
1780 "sample665M2",
1781 "sample676M2",
1782 "sample678M2",
1783 "sample694M2",
1784 "sample695M2",
1785 "sample794M2",
1786 "sample795M2",
1787 "sample801M2",
1788 "sample807M2",
1789 "sample809M2",
1790 "sample830M2",
1791 "sample833M2",
1792 "sample837M2",
1793 "sample851M2",
1794 "sample880M2",
1795 "sample884M2",
1796 "sample885M2",
1797 "sample891M2",
1798 "sample897M2",
1799 "sample907M2",
1800 "sample934M2",
1801 "sample935M2",
1802 "sampleP101M2",
1803 "sampleP201M2",
```



```
1804     "sampleP204M2"), vars=colnames(beta1))
1805
1806 betaM2=cbind(betaM2,beta1[,M2C])
1807 betaM2=as.data.frame(t(betaM2))
1808 colnames(betaM2)=colnames(beta1)
1809
1810 loess.linesM2=NULL
1811
1812 for (i in 1:nrow(betaM2)) {
1813   loess.linesM2=c(loess.linesM2,betaM2[i,])
1814 }
1815
1816 loess.linesM2=as.data.frame(loess.linesM2)
1817 loess.linesM2=t(loess.linesM2)
1818
1819 TPM2=c(rep(5,length(loess.linesM2)))
1820
1821 DEM2=c(rep("I",35*381),rep("C",34*381))
1822
1823
1824 #####
1825 ## M3 ##
1826 #####
1827
1828 M3=matches(c("M3"), vars=colnames(beta1))
1829
1830 betaM3=beta1[,M3]
1831 rownames(betaM3)=rownames(beta1)
1832 View(betaM3)
1833
1834 M3R=matches(c("sample3R451M3",
1835   "sample3R452M3",
1836   "sample3R455M3",
1837   "sample508M3",
1838   "sample509M3",
1839   "sample519M3",
1840   "sample526M3",
1841   "sample527M3",
1842   "sample540M3",
1843   "sample578M3",
1844   "sample583M3",
1845   "sample649M3",
1846   "sample663M3",
1847   "sample665M3",
1848   "sample676M3",
1849   "sample678M3",
1850   "sample694M3",
1851   "sample695M3",
1852   "sample794M3",
1853   "sample795M3",
1854   "sample801M3",
1855   "sample807M3",
1856   "sample809M3",
1857   "sample830M3",
1858   "sample833M3",
1859   "sample837M3",
1860   "sample851M3",
1861   "sample880M3",
1862   "sample884M3",
1863   "sample885M3",
1864   "sample891M3",
1865   "sample897M3",
1866   "sample907M3",
1867   "sample934M3",
1868   "sample935M3",
1869   "sampleP101M3",
1870   "sampleP201M3",
1871   "sampleP204M3"), vars=colnames(betaM3))
1872
1873 betaM3=betaM3[,-M3R]
1874
```

```
1875 M3C=matches(c("sample3R451M3",
1876 "sample3R452M3",
1877 "sample3R455M3",
1878 "sample508M3",
1879 "sample509M3",
1880 "sample519M3",
1881 "sample526M3",
1882 "sample527M3",
1883 "sample540M3",
1884 "sample578M3",
1885 "sample583M3",
1886 "sample649M3",
1887 "sample663M3",
1888 "sample665M3",
1889 "sample676M3",
1890 "sample678M3",
1891 "sample694M3",
1892 "sample695M3",
1893 "sample794M3",
1894 "sample795M3",
1895 "sample801M3",
1896 "sample807M3",
1897 "sample809M3",
1898 "sample830M3",
1899 "sample833M3",
1900 "sample837M3",
1901 "sample851M3",
1902 "sample880M3",
1903 "sample884M3",
1904 "sample885M3",
1905 "sample891M3",
1906 "sample897M3",
1907 "sample907M3",
1908 "sample934M3",
1909 "sample935M3",
1910 "sampleP101M3",
1911 "sampleP201M3",
1912 "sampleP204M3"), vars=colnames(beta1))
1913
1914
1915 betaM3=cbind(betaM3,beta1[,M3C])
1916 betaM3=as.data.frame(t(betaM3))
1917 colnames(betaM3)=colnames(beta1)
1918
1919 loess.linesM3=NULL
1920
1921 for (i in 1:nrow(betaM3)) {
1922   loess.linesM3=c(loess.linesM3,betaM3[i,])
1923 }
1924
1925 loess.linesM3=as.data.frame(loess.linesM3)
1926 loess.linesM3=t(loess.linesM3)
1927
1928 TPM3=c(rep(6,length(loess.linesM3)))
1929
1930 DEM3=c(rep("I",35*381),rep("C",35*381))
1931
1932 #####
1933 ## M4 ##
1934 #####
1935
1936 M4=matches(c("M4"), vars=colnames(beta1))
1937
1938 betaM4=beta1[,M4]
1939 rownames(betaM4)=rownames(beta1)
1940 View(betaM4)
1941
1942 M4C=matches(c("sample3R451M4",
1943 "sample3R452M4",
1944 "sample3R455M4",
1945 "sample508M4",
```

```
1946 "sample509M4",
1947 "sample519M4",
1948 "sample526M4",
1949 "sample527M4",
1950 "sample540M4",
1951 "sample578M4",
1952 "sample583M4",
1953 "sample649M4",
1954 "sample663M4",
1955 "sample665M4",
1956 "sample676M4",
1957 "sample678M4",
1958 "sample694M4",
1959 "sample695M4",
1960 "sample794M4",
1961 "sample795M4",
1962 "sample801M4",
1963 "sample807M4",
1964 "sample809M4",
1965 "sample830M4",
1966 "sample833M4",
1967 "sample837M4",
1968 "sample851M4",
1969 "sample880M4",
1970 "sample884M4",
1971 "sample885M4",
1972 "sample891M4",
1973 "sample897M4",
1974 "sample907M4",
1975 "sample934M4",
1976 "sample935M4",
1977 "sampleP101M4",
1978 "sampleP201M4",
1979 "sampleP204M4"), vars=colnames(beta1))
1980
1981
1982 betaM4=cbind(betaM4,beta1[,M4C])
1983 betaM4=as.data.frame(t(betaM4))
1984 colnames(betaM4)=colnames(beta1)
1985
1986 loess.linesM4=NULL
1987
1988 for (i in 1:nrow(betaM4)) {
1989   loess.linesM4=c(loess.linesM4,betaM4[i,])
1990 }
1991
1992 loess.linesM4=as.data.frame(loess.linesM4)
1993 loess.linesM4=t(loess.linesM4)
1994
1995 TPM4=c(rep(7,length(loess.linesM4)))
1996
1997 DEM4=c(rep("I",18*381),rep("C",33*381))
1998
1999
2000 #####
2001 ## M5 ##
2002 #####
2003
2004 M5=matches(c("M5"), vars=colnames(beta1))
2005
2006 betaM5=beta1[,M5]
2007 rownames(betaM5)=rownames(beta1)
2008 View(betaM5)
2009
2010 M5C=matches(c("sample3R451M5",
2011 "sample3R452M5",
2012 "sample3R455M5",
2013 "sample508M5",
2014 "sample509M5",
2015 "sample519M5",
2016 "sample526M5",
```

```
2017 "sample527M5",
2018 "sample540M5",
2019 "sample578M5",
2020 "sample583M5",
2021 "sample649M5",
2022 "sample663M5",
2023 "sample665M5",
2024 "sample676M5",
2025 "sample678M5",
2026 "sample694M5",
2027 "sample695M5",
2028 "sample794M5",
2029 "sample795M5",
2030 "sample801M5",
2031 "sample807M5",
2032 "sample809M5",
2033 "sample830M5",
2034 "sample833M5",
2035 "sample837M5",
2036 "sample851M5",
2037 "sample880M5",
2038 "sample884M5",
2039 "sample885M5",
2040 "sample891M5",
2041 "sample897M5",
2042 "sample907M5",
2043 "sample934M5",
2044 "sample935M5",
2045 "sampleP101M5",
2046 "sampleP201M5",
2047 "sampleP204M5"), vars=colnames(beta1))
2048
2049
2050 betaM5=cbind(betaM5,beta1[,M5C])
2051 betaM5=as.data.frame(t(betaM5))
2052 colnames(betaM5)=colnames(beta1)
2053 loess.linesM5=NULL
2054
2055 for (i in 1:nrow(betaM5)) {
2056   loess.linesM5=c(loess.linesM5,betaM5[i,])
2057 }
2058
2059 loess.linesM5=as.data.frame(loess.linesM5)
2060 loess.linesM5=t(loess.linesM5)
2061
2062 TPM5=c(rep(8,length(loess.linesM5)))
2063
2064 DEM5=c(rep("I",16*381),rep("C",36*381))
2065
2066 # Data frame for weighted unifracs in each timepoint (TP)
2067
2068 ##### TP 1 #####
2069 BC1I=betaM0[matches("M0", vars = rownames(betaM0)),matches("M0", vars = rownames(beta1))]
2070 BC1I=BC1I[,-M0R]
2071 colnames(BC1I)=rownames(BC1I)
2072 BC1I[upper.tri(BC1I)] <- NA
2073 BC1I[BC1I==0]=NA
2074
2075 BC1WI=NULL
2076
2077 for(i in 1:nrow(BC1I)){
2078   BC1WI=c(BC1WI,BC1I[i,])
2079 }
2080
2081 BC1WI=as.data.frame(BC1WI)
2082
2083 F1=1;Fn=0
2084
2085 for(i in 1:nrow(BC1I)){
2086   for(j in 1:ncol(BC1I)){
2087     Fn=Fn+F1
```

```
2088   colnames(BC1WI)[Fn]=paste(rownames(BC1)[i],"/",colnames(BC1)[j])
2089   }
2090 }
2091
2092 colnames(BC1WI)=sub("M0","",colnames(BC1WI))
2093 colnames(BC1WI)=sub("M0","",colnames(BC1WI))
2094
2095 BC1C=beta1[M0C,M0C]
2096 BC1C[upper.tri(BC1C)] <- NA
2097 BC1C[BC1C==0]=NA
2098 rownames(BC1C)=colnames(BC1C)
2099
2100 BC1WC=NULL
2101
2102 for(i in 1:nrow(BC1C)){
2103   BC1WC=c(BC1WC,BC1C[i,])
2104 }
2105
2106 BC1WC=as.data.frame(BC1WC)
2107
2108 F1=1;Fn=0
2109
2110 for(i in 1:nrow(BC1C)){
2111   for(j in 1:nrow(BC1C)){
2112     Fn=Fn+F1
2113     colnames(BC1WC)[Fn]=paste(rownames(BC1C)[i],"/",colnames(BC1C)[j])
2114   }
2115 }
2116
2117 colnames(BC1WC)=sub("M0","",colnames(BC1WC))
2118 colnames(BC1WC)=sub("M0","",colnames(BC1WC))
2119
2120 ##### TP 2 #####
2121 BC2I=betaM1[matches("M1", vars = rownames(betaM1)),matches("M1", vars = rownames(beta1))]
2122 BC2I=BC2I[,-M1R]
2123 colnames(BC2I)=rownames(BC2I)
2124 BC2I[upper.tri(BC2I)] <- NA
2125 BC2I[BC2I==0]=NA
2126
2127 BC2WI=NULL
2128
2129 for(i in 1:nrow(BC2I)){
2130   BC2WI=c(BC2WI,BC2I[i,])
2131 }
2132
2133 BC2WI=as.data.frame(BC2WI)
2134
2135 F1=1;Fn=0
2136
2137 for(i in 1:nrow(BC2I)){
2138   for(j in 1:nrow(BC2I)){
2139     Fn=Fn+F1
2140     colnames(BC2WI)[Fn]=paste(rownames(BC2I)[i],"/",colnames(BC2I)[j])
2141   }
2142 }
2143
2144 colnames(BC2WI)=sub("M1","",colnames(BC2WI))
2145 colnames(BC2WI)=sub("M1","",colnames(BC2WI))
2146
2147 BC2C=beta1[M1C,M1C]
2148 BC2C[upper.tri(BC2C)] <- NA
2149 BC2C[BC2C==0]=NA
2150 rownames(BC2C)=colnames(BC2C)
2151
2152 BC2WC=NULL
2153 for(i in 1:nrow(BC2C)){
2154   BC2WC=c(BC2WC,BC2C[i,])
2155 }
2156
2157 BC2WC=as.data.frame(BC2WC)
2158
```

```
2159 F1=1;Fn=0
2160
2161 for(i in 1:nrow(BC2C)){
2162   for(j in 1:nrow(BC2C)){
2163     Fn=Fn+F1
2164     colnames(BC2WC)[Fn]=paste(rownames(BC2C)[i],"/",colnames(BC2C)[j])
2165   }
2166 }
2167
2168 colnames(BC2WC)=sub("M1","",colnames(BC2WC))
2169 colnames(BC2WC)=sub("M1","",colnames(BC2WC))
2170
2171 ##### TP 3 #####
2172 BC3I=betaM2[matches("M2", vars = rownames(betaM2)),matches("M2", vars = rownames(beta1))]
2173 BC3I=BC3I[,-M2R]
2174 BC3I[upper.tri(BC3I)] <- NA
2175 BC3I[BC3I==0]=NA
2176 colnames(BC3I)=rownames(BC3I)
2177
2178 BC3WI=NULL
2179
2180 for(i in 1:nrow(BC3I)){
2181   BC3WI=c(BC3WI,BC3I[i,])
2182 }
2183
2184 BC3WI=as.data.frame(BC3WI)
2185
2186 F1=1;Fn=0
2187
2188 for(i in 1:nrow(BC3I)){
2189   for(j in 1:nrow(BC3I)){
2190     Fn=Fn+F1
2191     colnames(BC3WI)[Fn]=paste(rownames(BC3I)[i],"/",colnames(BC3I)[j])
2192   }
2193 }
2194
2195 colnames(BC3WI)=sub("M2","",colnames(BC3WI))
2196 colnames(BC3WI)=sub("M2","",colnames(BC3WI))
2197
2198 BC3C=beta1[M2C,M2C]
2199 BC3C[upper.tri(BC3C)] <- NA
2200 BC3C[BC3C==0]=NA
2201 rownames(BC3C)=colnames(BC3C)
2202
2203 BC3WC=NULL
2204 for(i in 1:nrow(BC3C)){
2205   BC3WC=c(BC3WC,BC3C[i,])
2206 }
2207
2208 BC3WC=as.data.frame(BC3WC)
2209
2210 F1=1;Fn=0
2211
2212 for(i in 1:nrow(BC3C)){
2213   for(j in 1:nrow(BC3C)){
2214     Fn=Fn+F1
2215     colnames(BC3WC)[Fn]=paste(rownames(BC3C)[i],"/",colnames(BC3C)[j])
2216   }
2217 }
2218
2219 colnames(BC3WC)=sub("M2","",colnames(BC3WC))
2220 colnames(BC3WC)=sub("M2","",colnames(BC3WC))
2221
2222 ##### TP 4 #####
2223 BC4I=betaM3[matches("M3", vars = rownames(betaM3)),matches("M3", vars = rownames(beta1))]
2224 BC4I=BC4I[,-M3R]
2225 BC4I[upper.tri(BC4I)] <- NA
2226 BC4I[BC4I==0]=NA
2227 colnames(BC4I)=rownames(BC4I)
2228
2229 BC4WI=NULL
```

```
2230
2231 for(i in 1:nrow(BC4I)){
2232   BC4WI=c(BC4WI,BC4I[i,])
2233 }
2234
2235 BC4WI=as.data.frame(BC4WI)
2236
2237 F1=1;Fn=0
2238
2239 for(i in 1:nrow(BC4I)){
2240   for(j in 1:nrow(BC4I)){
2241     Fn=Fn+F1
2242     colnames(BC4WI)[Fn]=paste(rownames(BC4I)[i],"/",colnames(BC4I)[j])
2243   }
2244 }
2245
2246 colnames(BC4WI)=sub("M3","",colnames(BC4WI))
2247 colnames(BC4WI)=sub("M3","",colnames(BC4WI))
2248
2249 BC4C=beta1[M3C,M3C]
2250 BC4C[upper.tri(BC4C)] <- NA
2251 BC4C[BC4C==0]=NA
2252 rownames(BC4C)=colnames(BC4C)
2253
2254 BC4WC=NULL
2255
2256 for(i in 1:nrow(BC4C)){
2257   BC4WC=c(BC4WC,BC4C[i,])
2258 }
2259
2260 BC4WC=as.data.frame(BC4WC)
2261
2262 F1=1;Fn=0
2263
2264 for(i in 1:nrow(BC4C)){
2265   for(j in 1:nrow(BC4C)){
2266     Fn=Fn+F1
2267     colnames(BC4WC)[Fn]=paste(rownames(BC4C)[i],"/",colnames(BC4C)[j])
2268   }
2269 }
2270
2271 colnames(BC4WC)=sub("M3","",colnames(BC4WC))
2272 colnames(BC4WC)=sub("M3","",colnames(BC4WC))
2273
2274 #### TP 5 ####
2275 BC5I=beta1[M4,M4]
2276 BC5I[upper.tri(BC5I)] <- NA
2277 BC5I[BC5I==0]=NA
2278 rownames(BC5I)=colnames(BC5I)
2279
2280 BC5WI=NULL
2281
2282 for(i in 1:nrow(BC5I)){
2283   BC5WI=c(BC5WI,BC5I[i,])
2284 }
2285
2286 BC5WI=as.data.frame(BC5WI)
2287
2288 F1=1;Fn=0
2289
2290 for(i in 1:nrow(BC5I)){
2291   for(j in 1:nrow(BC5I)){
2292     Fn=Fn+F1
2293     colnames(BC5WI)[Fn]=paste(rownames(BC5I)[i],"/",colnames(BC5I)[j])
2294   }
2295 }
2296
2297 colnames(BC5WI)=sub("M4","",colnames(BC5WI))
2298 colnames(BC5WI)=sub("M4","",colnames(BC5WI))
2299
2300 BC5C=beta1[M4C,M4C]
```

```
2301 BC5C[upper.tri(BC5C)] <- NA
2302 BC5C[BC5C==0]=NA
2303 rownames(BC5C)=colnames(BC5C)
2304
2305 BC5WC=NULL
2306
2307 for(i in 1:nrow(BC5C)){
2308   BC5WC=c(BC5WC,BC5C[i,])
2309 }
2310
2311 BC5WC=as.data.frame(BC5WC)
2312
2313 F1=1;Fn=0
2314
2315 for(i in 1:nrow(BC5C)){
2316   for(j in 1:nrow(BC5C)){
2317     Fn=Fn+F1
2318     colnames(BC5WC)[Fn]=paste(rownames(BC5C)[i],"/",colnames(BC5C)[j])
2319   }
2320 }
2321
2322 colnames(BC5WC)=sub("M4","",colnames(BC5WC))
2323 colnames(BC5WC)=sub("M4","",colnames(BC5WC))
2324
2325 ##### TP 6 #####
2326 BC6I=beta1[M5,M5]
2327 BC6I[upper.tri(BC6I)] <- NA
2328 BC6I[BC6I==0]=NA
2329 rownames(BC6I)=colnames(BC6I)
2330
2331 BC6WI=NULL
2332
2333 for(i in 1:nrow(BC6I)){
2334   BC6WI=c(BC6WI,BC6I[i,])
2335 }
2336
2337 BC6WI=as.data.frame(BC6WI)
2338
2339 F1=1;Fn=0
2340
2341 for(i in 1:nrow(BC6I)){
2342   for(j in 1:nrow(BC6I)){
2343     Fn=Fn+F1
2344     colnames(BC6WI)[Fn]=paste(rownames(BC6I)[i],"/",colnames(BC6I)[j])
2345   }
2346 }
2347
2348 colnames(BC6WI)=sub("M5","",colnames(BC6WI))
2349 colnames(BC6WI)=sub("M5","",colnames(BC6WI))
2350
2351 BC6C=beta1[M5C,M5C]
2352 BC6C[upper.tri(BC6C)] <- NA
2353 BC6C[BC6C==0]=NA
2354 rownames(BC6C)=colnames(BC6C)
2355
2356 BC6WC=NULL
2357
2358 for(i in 1:nrow(BC6C)){
2359   BC6WC=c(BC6WC,BC6C[i,])
2360 }
2361
2362 BC6WC=as.data.frame(BC6WC)
2363
2364 F1=1;Fn=0
2365
2366 for(i in 1:nrow(BC6C)){
2367   for(j in 1:nrow(BC6C)){
2368     Fn=Fn+F1
2369     colnames(BC6WC)[Fn]=paste(rownames(BC6C)[i],"/",colnames(BC6C)[j])
2370   }
2371 }
```



```
2372
2373 colnames(BC6WC)=sub("M5","",colnames(BC6WC))
2374 colnames(BC6WC)=sub("M5","",colnames(BC6WC))
2375
2376 ##### all TPs #####
2377 BCig=cbind(BC1WI,BC1WC,BC2WI,BC2WC,BC3WI,BC3WC,BC4WI,BC4WC,BC5WI,BC5WC,BC6WI,BC6WC)
2378 BCig=t(BCig)
2379 BCig=as.data.frame(BCig)
2380 BCig$TimePoint=c(rep(3,(ncol(BC1WC)+ncol(BC1WI))),rep(4,(ncol(BC2WC)+ncol(BC2WI))),rep(5,(ncol(BC3WC)+ncol(BC3WI))),rep(
2381 6,(ncol(BC4WC)+ncol(BC4WI))),rep(7,(ncol(BC5WC)+ncol(BC5WI))),rep(8,(ncol(BC6WC)+ncol(BC6WI))))
2382 BCig$Grupo=c(rep("PR",ncol(BC1WI)),rep("Control",ncol(BC1WC)),rep("PR",ncol(BC2WI)),rep("Control",ncol(BC2WC)),rep("PR",nc
2383 ol(BC3WI)),rep("Control",ncol(BC3WC)),rep("PR",ncol(BC4WI)),rep("Control",ncol(BC4WC)),rep("PR",ncol(BC5WI)),rep("Control",n
2384 col(BC5WC)),rep("PR",ncol(BC6WI)),rep("Control",ncol(BC6WC)))
2385 BCig$Id=row.names(BCig)
2386 BCig$TP=as.factor(BCig$TimePoint)
2387 BCig$Grupo=as.factor(BCig$Grupo)
2388 colnames(BCig)=c("BC","TimePoint","Grupo","id","TP")
2389
2390 BCig=BCig[complete.cases(BCig),]
2391
2392 library(tools)
2393 BCig$Id=file_path_sans_ext(BCig$Id)
2394
2395 BCig$Baseline=NULL
2396 for(j in 1:1225){
2397   for (i in 1:nrow(BCig)){
2398     if(BCig$Id[i]==BCig$Id[j]){
2399       BCig$Baseline[i]=BCig$BC[j]
2400     }
2401   }
2402 }
2403
2404 BCig$Baseline[round(BCig$Baseline,7)==0.2510891]=NA #change for the first value of the matrix
2405 BCig$Baseline[BCig$Id=="sample3R493...sample3R506"]=0.2510891 #change for the first value of the matrix
2406
2407
2408 #global rate of change
2409
2410 BCig$Norm_BC=NULL
2411
2412 for(i in 1:nrow(BCig)){
2413   BCig$Norm_BC[i]=BCig$BC[i]-BCig$Baseline[i]
2414 }
2415
2416 BCig$Norm_BC[BCig$TP=="3"]=0
2417 BCig$TimePoint=BCig$TimePoint-2
2418
2419 #experimental design
2420 library(ggthemes)
2421 ggplot(data=BCig, aes(TimePoint, Norm_BC))+
2422   geom_smooth(method="loess", aes(color=Grupo), se=T)+
2423   ylab("Weighted Unifrac (Global Rate of Change)")+
2424   labs(colour="Group")+
2425   theme_classic()+
2426   scale_x_continuous(labels=as.character(BCig$TimePoint),breaks=BCig$TimePoint)
2427
2428 library(lme4)
2429 modelGRC1 <- lmer(Norm_BC ~ Grupo * TP + (1|id), data = BCig)
2430 LME.GCR=Anova(modelGRC1, test.statistic = "F", type = "III")
2431 LME.GCR
2432
2433 ### quality assessment ###
2434 AIC(modelGRC1)
2435
2436 library(MuMIn)
2437 r.squaredGLMM(modelGRC1)
2438
2439 res=residuals(modelGRC1)
2440 mean(res)
2441
2442 qqnorm(res, datax = TRUE)
```

```
2443 qqline(res, datax = TRUE)
2444
2445 #contrast analyses
2446 library(gmodels)
2447 library(lsmmeans)
2448 ref3<-lsmmeans(modelGRC1 ,c("Grupo", "TP"))
2449 ref3 #check the combination of factors for contrasts
2450 ContrastVec <- list(M3=c(1,-1,0,0,0,0,0,0,0,0,0,0,0,0,0,0), M4=c(0,0,1,-1,0,0,0,0,0,0,0,0,0,0,0), M5=c(0,0,0,0,1,-1,0,0,0,0,0,0,0,0,0), M6=c(0,0,0,0,0,0,1,-1,0,0,0,0,0,0,0), M7=c(0,0,0,0,0,0,0,0,1,-1,0,0), M8=c(0,0,0,0,0,0,0,0,0,0,0,1,-1))
2451 summary(contrast(ref3, ContrastVec), adjust = "bonferroni")
2452
2453
2454
2455 #descriptive analysis' table
2456 M_WIG.G=aggregate(Norm_BC~ Grupo+TimePoint, data = BCig, FUN= "mean" )
2457 SD_WIG.G=aggregate(Norm_BC~ Grupo+TimePoint, data = BCig, FUN= "sd" )
2458 SD_WIG.G$BC=as.numeric(SD_WIG.G$Norm_BC)
2459 Table7=M_WIG.G
2460 Table7$TimePoint=factor(rep(c("M3","M4","M5","M6","M7","M8"), each=2), levels = c("M3","M4","M5","M6","M7","M8"))
2461 Table7$Norm_BC=round(as.numeric(Table7$Norm_BC),2)
2462 View(Table7)
2463
2464 for(i in 1:12){
2465   Table7$Norm_BC[i]=paste(Table7$Norm_BC[i],"\u00B1", round(SD_WIG.G$Norm_BC[i],2))}
2466
2467 colnames(Table7)=c("Grupo", "Timepoint", "Mean \u00B1 SD")
2468
2469 ref3=as.data.frame(ref3)
2470
2471 Table7$lsmmean=NULL
2472 for(i in 1:12){
2473   Table7$lsmmean[i]=paste(round(ref3[i,3],2),"\u00B1",round(ref3[i,4],3))
2474 }
2475
2476 Table7=Table7[,c(2,1,3,4)]
2477
2478 library(kableExtra)
2479 kbl(Table7) %>%
2480   kable_classic(full_width=F) %>%
2481   column_spec(1, bold = T) %>%
2482   row_spec(c(0),bold = T)%>%
2483   collapse_rows(columns = 1, valign = "middle")
2484
2485 #library(xlsx)
2486 #write.xlsx(Table7,"Tabelas descritivas.xlsx", sheetName="Wheighted_U_IG_BL",append=TRUE)
2487 #write.xlsx(Table7,"Tabelas descritivas.xlsx", sheetName="BC_IG_BL",append=TRUE)
2488
2489 ggline(BCig, x="TP",y="Norm_BC",add = c("mean_se"), color = "Grupo")+ylab("Weighted Unifrac")#Mean plot
2490
2491 ggline(ref3, x="TP",y="lsmmean",add = c("mean_se"), color = "Grupo")+ylab("Weighted Unifrac")#Mean plot
2492
2493 #LSMEANS graphs
2494
2495 ref1=as.data.frame(ref1)
2496 colnames(ref1)[1]="Group"
2497 lsmmeans1=ref1[,c(1,2,3)]
2498
2499 library(ggplot2)
2500 library(ggpubr)
2501 ggline(ref1, x="TP",y="lsmmean", color = "Group")+ylab("lsmmeans Weighted Unifrac")
2502
2503 ref3=as.data.frame(ref3)
2504 colnames(ref3)[1]="Group"
2505 lsmmeans3=ref3[,c(1,2,3)]
2506
2507
2508 library(ggplot2)
2509 library(ggpubr)
2510 ggline(ref3, x="TP",y="lsmmean", color = "Group")+ylab("lsmmeans GRC Weighted Unifrac")+labs(colour="Group")
2511
2512 # Effect size
2513 library(effectsize)
```

```
2514 library(lme4)
2515 library(car)
2516 library(lmerTest)
2517 model2.1=lmer(BC ~ Grupo * TP + Baseline + (1|id), data = BCig)
2518 summary(model2.1)
2519 summary(model2)
2520 anova(model2.1)#Kenward-Roger (Kenward & Roger, 1997) and Satterthwaite (1941) approach to calculate residuals degrees of
2521 freedom
2522 summary(model2)
2523 F_to_eta2(14,5,4356,ci=0.95)
```

2524

2525 *Linear Mixed effect models, contrast analysis and Loess lines plots (e.g. longitudinal dynamic of*  
2526 *Dialister between R and NR to mBorg)*

```
2527 library(readxl)
2528 longitudinal_data <- read_excel("All_OTUs_longitudinal_compl.xlsx")
2529
2530 #removal of genera that were present in <20% of the samples
2531 OTU_selected=NULL
2532
2533 n=1
2534 for(i in 8:ncol(All_OTUs_longitudinal_compl)){
2535   if(sum(Dados_clean[,i]>0)>=83){
2536     OTU_selected[n]=colnames(All_OTUs_longitudinal_compl)[i]
2537     n = n + 1
2538   }
2539 }
2540
2541 Dados_clean_filtered=Dados_clean[,OTU_selected]
2542 Dados_clean_filtered=as.data.frame(cbind(Dados_clean_filtered,Dados_clean[,c(7:8)],Dados_clean[,1:6],Dados_clean[,204]))
2543 #R e NR
2544 Dados_clean_filtered[,81]=as.factor(Dados_clean_filtered[,81])
2545 Dados_clean_filtered[,82]=as.factor(Dados_clean_filtered[,82])
2546 Dados_clean_filtered[,83]=as.factor(Dados_clean_filtered[,83])
2547 Dados_clean_filtered[,84]=as.factor(Dados_clean_filtered[,84])
2548 Dados_clean_filtered[,85]=as.factor(Dados_clean_filtered[,85])
2549 Dados_clean_filtered[,86]=as.factor(Dados_clean_filtered[,86])
2550
2551 Dados_PR=subset(Dados_clean_filtered,Group=="PR")
2552
2553 #linear mixed effect models between R and NR to mBorg
2554
2555 Resultados_modelos_mBorg=data.frame(OTU=NULL,Statistic=NULL,Pvalue=NULL,Assumptions=NULL)
2556
2557 library(lme4)
2558 library(car)
2559 n=1
2560 for(i in 1:79){
2561   modelo1 <- lmer(Dados_PR_raw[,i] ~ TP*RmBorg + (1|OTU_ID), data = Dados_PR)
2562   LME=Anova(modelo1, test.statistic = "F", type = "III")
2563   if(LME[4,4]<0.05){
2564     Resultados_modelos_mBorg[n,1]=colnames(Dados_PR)[i]
2565     Resultados_modelos_mBorg[n,2]=LME[4,1]
2566     Resultados_modelos_mBorg[n,3]=LME[4,4]
2567     n=n+1
2568   }
2569 }
2570 write.xlsx(Resultados_modelos_mBorg,"OTUs_ASVs_long.xlsx", append = TRUE, sheetName = "mBorg")
2571
2572 #validation of assumptions
2573 modelo_dia_mborg <- lmer(`k__Bacteria;p__Firmicutes;c__Clostridia;o__Clostridiales;f__Veillonellaceae;g__Dialister`~
2574 TP*RmBorg + (1|OTU_ID), data = Dados_PR)
2575 res=residuals(modelo_dia_mborg)
2576 qqnorm(res)
2577 qqline(res)
2578 plot(modelo1)
2579
2580 #contrast analysis
2581 ref1<-lsmeans(modelo_sch_bmsr,c("RmBorg","TP"))
```



```
2651 }
2652 }
2653
2654 rownames(Matriz_corr)=colnames(longitudinal_data_f[68:80])#Colunas das citocinas
2655 rownames(Matriz_corr)=gsub("\\.*"," ",colnames(longitudinal_data_f[68:80]))#Colunas das citocinas
2656
2657
2658 #Reducing genera taxonomic annotation
2659 for(i in 1:length(colnames(Matriz_corr))){
2660   if(grepl("g_",colnames(longitudinal_data_f[i]))&
2661 !grepl("f_",colnames(longitudinal_data_f[i])|!grepl("g_",colnames(longitudinal_data_f[i]))){
2662     colnames(Matriz_corr)[i]=paste(gsub("\\.*f_", "", colnames(longitudinal_data_f[i])),
2663     gsub("g*.", "",
2664     colnames(longitudinal_data_f[i]))
2665   } else if (grepl("f_",colnames(longitudinal_data_f[i])& !grepl("o_",colnames(longitudinal_data_f[i]))){
2666     colnames(Matriz_corr)[i]=paste(gsub("\\.*o_", "", colnames(longitudinal_data_f[i])),
2667     gsub("f*.", "",
2668     colnames(longitudinal_data_f[i]))
2669   } else if (grepl("o_",colnames(longitudinal_data_f[i])& !grepl("c_",colnames(longitudinal_data_f[i])) {
2670     colnames(Matriz_corr)[i]=paste(gsub("\\.*c_", "", colnames(longitudinal_data_f[i])),
2671     gsub("o*.", "",
2672     colnames(longitudinal_data_f[i]))
2673   }
2674 }
2675 colnames(Matriz_corr)
2676 rownames(Pvalues)=colnames(longitudinal_data_f[68:80])#Colunas das citocinas
2677 rownames(Pvalues)=gsub("\\.*"," ",colnames(longitudinal_data_f[68:80]))
2678 colnames(Pvalues)=paste(gsub("\\.*_", "", colnames(longitudinal_data_f[1:63])))#Colunas das OTUs ASVs
2679 #export correlation matrix
2680 write.xlsx(Matriz_corr,"Matrix_log10_Citocinas_arcsin_OTUs_NR_6MWTI6.xlsx")
2681
2682 #assessment of assumptions validation
2683 corr_sign=data.frame(Correlation=NULL, P=NULL, Coefficient=NULL, Norm_Validation=NULL)
2684 l=0
2685 for(i in 1:63) {#colunas das ASVs OTUs na matrix de corr
2686   for(n in 1:13){#linhas das citocinas na matrix de corr
2687     if(Pvalues[n,i]<0.05){
2688       l=l+1
2689       corr_sign[l,1]=paste(colnames(Matriz_corr)[i],"VS",rownames(Matriz_corr)[n])
2690       corr_sign[l,2]=Pvalues[n,i]
2691       corr_sign[l,3]=Matriz_corr[n,i]
2692     }
2693   }
2694 }
2695 colnames(corr_sign)=c("Correlation", "P-value", "Coefficient")
2696 normal_test=as.data.frame(NULL)
2697 library(rmcorr)
2698 for(i in 68:80){#Colunas das citocinas
2699   for(n in 1:63){#Colunas das ASVs OTUs
2700     r=rmcorr(longitudinal_data_f[sampleID],longitudinal_data_f[,i],longitudinal_data_f[,n],dataset = longitudinal_data_f)
2701     res=residuals(r$model)
2702     shap=shapiro.test(res)[2]
2703     normal_test[i-67,n]=shap#Mudar número para a primeira coluna das citocinas menos 1.
2704   }
2705 }
2706 #normally distributed residuals
2707 l=1
2708 for(i in 1:63) {#columns with OTUs/ASVs
2709   for(n in 1:13){#rows with cytokines
2710     l=l+1
2711     if(normal_test[n,i]<0.05){
2712       corr_sign[l,4]="Not Validated"
2713     } else{
2714       corr_sign[l,4]="Validated"
2715     }
2716   }
2717 }
2718 }
2719 corr_sign=corr_sign[complete.cases(corr_sign),]
2720 colnames(corr_sign)[4]="Residual Normal Distribution"
2721
2722
```

```
2722 library(xlsx)
2723 write.xlsx(corr_sign,"log10_Citocinas_OTUs_NR_6MWTI6.xlsx")
```

2724 *Correlation network plots (e.g. network based on the significant correlations between the log10*  
2725 *of inflammatory cytokines and arcsine square root transformed genera relative abundances in*  
2726 *NR to mBorg)*

```
2727
2728 library(readxl)
2729 NR_BMSD <- read_excel("Matrix_log10_Citocinas_arcsin_OTUs_NR_mBorg.xlsx")
2730 library(tidyrr)
2731
2732 OTUs=c(rep(c('ASV_streptococcus','Lachnoanaerobaculum','Butyrivibrio','Catonella','Lachnospiraceae',
2733 13))#Colocar o nome das bactérias que se quer representar
2734 citocinas = c(rep(NR_BMSD$...1,6))
2735
2736 corr=c(NR_mBorg$str_sp,
2737 NR_mBorg$Lachnospiraceae;g__Lachnoanaerobaculum`,
2738 NR_mBorg$Lachnospiraceae;g__Butyrivibrio`,
2739 NR_mBorg$Lachnospiraceae;g__Catonella`,
2740 NR_mBorg$Lachnospiraceae;__,
2741 NR_mBorg$Burkholderiaceae;g__Lautropia`)
2742
2743 data=data.frame(OTU = OTUs, Citokynes = citocinas, Correlation = corr)#all data
2744 data
2745 data_sign = data[c(2,17,18,20,29,41,42,45,47,55,58,60,61,65,68,73),]#select only the correlations validating the assumptions
2746 data_sign <- data_sign[order(data_sign$Correlation),]
2747 data_sign
2748
2749 nodes_sign <- data.frame(
2750 name=c('ASV_streptococcus','Lachnoanaerobaculum','Butyrivibrio','Catonella','Lachnospiraceae', 'Lautropia',
2751 NR_mBorg$...1[c(2,3,4,5,6,7,8,9,13)]), #cytokines
2752 carac=c(rep("Bacteria",6), rep('Citokyne',9))
2753 )
2754
2755 #nodes <- data.frame(
2756 # name=c('Lautropia','Rothia','Gemellaceae',Matrix_log10_Citocinas_arcsin_OTUs_NR_6MWTI6$...1),
2757 #carac=c(rep("Bacteria",3), rep('Citokyne',13))
2758 #)
2759
2760 library(igraph)
2761 # Turn it into igraph object
2762 network <- graph_from_data_frame(d=data_sign, vertices=nodes_sign, directed=F)
2763 V(network)
2764
2765 # Make a palette of colors
2766 vcolrs<-c('goldenrod1','goldenrod1','goldenrod1','goldenrod1','goldenrod1','red','papayawhip',
2767 'papayawhip','papayawhip','papayawhip','papayawhip','papayawhip','papayawhip','papayawhip')
2768 ecolrs <- ifelse( E(network)$Correlation >0, "firebrick3", "deepskyblue3")
2769 deg <- degree(network, mode="all")*1.5
2770
2771 # Make the plot
2772 plot(network, vertex.color=vcolrs, edge.color=ecolrs,
2773 vertex.label.color="black",
2774 vertex.frame.color="#ffffff",
2775 vertex.shape="circle",
2776 vertex.label.family="Arial",
2777 vertex.label.cex=1,
2778 edge.width=as.integer(abs(E(network)$Correlation)*10),
2779 vertex.size=deg*10,
2780 edge.label.cex=0.8)
2781
2782 #open a graphical interface to re-arrange the plot
2783 tkplot(network, vertex.color=vcolrs, edge.color=ecolrs,
2784 vertex.label.color="black",
2785 vertex.frame.color="#ffffff",
2786 vertex.shape="circle",
2787 vertex.label.family="Arial",
2788 vertex.label.cex=1,
```

```
2790 edge.width=as.integer(abs(E(network)$Correlation)*10),  
2791 vertex.size=deg*10,  
2792 edge.label.cex=0.8)  
2793  
2794 write_graph(network, "NR_BMSD_network.gml", format = "gml")
```

2795 *Pitman-Morgan paired variance test (e.g. Variance of IL-1 $\beta$  in NR to exercise capacity)*

```
2796 library(readxl)  
2797 var_6mwt <- read_excel("var_6mwt.xlsx")  
2798  
2799 library(PairedData)  
2800 Var.test(var_6mwt$IL1bM1NR, var_6mwt$IL1bM2NR,paired=TRUE)  
2801 #p=0.01  
2802 Var.test(var_6mwt$IL1bM2NR, var_6mwt$IL1bM4NR,paired=TRUE)  
2803 #p=0.007  
2804 Var.test(var_6mwt$IL1bM1NR, var_6mwt$IL1bM4NR,paired=TRUE)  
2805 #p=0.05  
2806  
2807 #adjusting for multiple comparisons  
2808 a<-c(0.01, 0.007, 0.053)  
2809 p.adjust(a, method = "bonferroni", n = 3) #0.030 0.021 0.159
```

2810

## 2811 References

- 2812 1 Marques A, Jácome C, Rebelo P, *et al.* Improving access to community-based pulmonary  
2813 rehabilitation: 3R protocol for real-world settings with cost-benefit analysis. *BMC Public*  
2814 *Health* 2019;**19**:676. doi:10.1186/s12889-019-7045-1
- 2815 2 Charlson ME, Pompei P, Ales KL, *et al.* A new method of classifying prognostic comorbidity  
2816 in longitudinal studies: development and validation. *J Chronic Dis* 1987;**40**:373–83.  
2817 doi:10.1016/0021-9681(87)90171-8
- 2818 3 GOLD - Global Strategy for Diagnosis, Management, and prevention of chronic obstructive  
2819 pulmonary disease 2020 report. 2020. 1–141.
- 2820 4 Standardization of Spirometry 2019 Update. An Official American Thoracic Society and  
2821 European Respiratory Society Technical Statement | American Journal of Respiratory and  
2822 Critical Care Medicine. <https://www.atsjournals.org/doi/full/10.1164/rccm.201908-1590ST>  
2823 (accessed 28 Oct 2022).
- 2824 5 Jones PW, Harding G, Berry P, *et al.* Development and first validation of the COPD  
2825 Assessment Test. *European Respiratory Journal* 2009;**34**:648–54.  
2826 doi:10.1183/09031936.00102509
- 2827 6 Jones PW, Tabberer M, Chen W-H. Creating scenarios of the impact of COPD and their  
2828 relationship to COPD Assessment Test (CAT™) scores. *BMC Pulm Med* 2011;**11**:42.  
2829 doi:10.1186/1471-2466-11-42
- 2830 7 ATS Statement. *Am J Respir Crit Care Med* 2002;**166**:111–7.  
2831 doi:10.1164/ajrccm.166.1.at1102
- 2832 8 Holland AE, Spruit MA, Troosters T, *et al.* An official European Respiratory Society/American  
2833 Thoracic Society technical standard: field walking tests in chronic respiratory disease.  
2834 *European Respiratory Journal* 2014;**44**:1428–46. doi:10.1183/09031936.00150314
- 2835 9 Jones PW, Beeh KM, Chapman KR, *et al.* Minimal clinically important differences in  
2836 pharmacological trials. *Am J Respir Crit Care Med* 2014;**189**:250–5.  
2837 doi:10.1164/rccm.201310-1863PP
- 2838 10 Holland AE, Hill CJ, Rasekaba T, *et al.* Updating the minimal important difference for six-  
2839 minute walk distance in patients with chronic obstructive pulmonary disease. *Arch Phys*  
2840 *Med Rehabil* 2010;**91**:221–5. doi:10.1016/j.apmr.2009.10.017
- 2841 11 Bolyen E, Rideout JR, Dillon MR, *et al.* Reproducible, interactive, scalable and extensible  
2842 microbiome data science using QIIME 2. *Nat Biotechnol* 2019;**37**:852–7.  
2843 doi:10.1038/s41587-019-0209-9
- 2844 12 Baeshen HA. Assessment of salivary pro inflammatory cytokines profile level in patients  
2845 treated with labial and lingual fixed orthodontic appliances. *PLoS One* 2021;**16**:e0249999.  
2846 doi:10.1371/journal.pone.0249999
- 2847 13 Maydych V, Claus M, Watzl C, *et al.* Attention to Emotional Information Is Associated With  
2848 Cytokine Responses to Psychological Stress. *Frontiers in Neuroscience*  
2849 2018;**12**.<https://www.frontiersin.org/articles/10.3389/fnins.2018.00687> (accessed 25 Nov  
2850 2022).



- 2851 14 LEGENDplex™. <https://www.biolegend.com/en-us/legendplex> (accessed 21 Mar 2022).
- 2852 15 Prism - GraphPad. <https://www.graphpad.com/scientific-software/prism/> (accessed 12 Jan  
2853 2022).
- 2854 16 R: The R Project for Statistical Computing. <https://www.r-project.org/> (accessed 12 Jan  
2855 2022).
- 2856 17 QIIME 2. <https://qiime2.org/> (accessed 12 Jan 2022).
- 2857 18 vsearch — QIIME 2 2020.8.0 documentation.  
2858 <https://docs.qiime2.org/2020.8/plugins/available/vsearch/> (accessed 30 Dec 2021).
- 2859 19 deblur — QIIME 2 2020.8.0 documentation.  
2860 <https://docs.qiime2.org/2020.8/plugins/available/deblur/> (accessed 30 Dec 2021).
- 2861 20 Amir A, McDonald D, Navas-Molina JA, *et al.* Deblur Rapidly Resolves Single-Nucleotide  
2862 Community Sequence Patterns. *mSystems* 2017;**2**:e00191-16, /msys/2/2/e00191-16.atom.  
2863 doi:10.1128/mSystems.00191-16
- 2864 21 Callahan B, Davis NM, Ernst FGM. decontam: Identify Contaminants in Marker-gene and  
2865 Metagenomics Sequencing Data. 2021. doi:10.18129/B9.bioc.decontam
- 2866 22 Callahan B. benjjneb/decontam. 2021. <https://github.com/benjjneb/decontam> (accessed 12  
2867 Jan 2022).
- 2868 23 Phylogenetic inference with q2-phylogeny — QIIME 2 2021.11.0 documentation.  
2869 <https://docs.qiime2.org/2021.11/tutorials/phylogeny/?highlight=phylogeny> (accessed 30  
2870 Dec 2021).
- 2871 24 Katoh K, Misawa K, Kuma K, *et al.* MAFFT: a novel method for rapid multiple sequence  
2872 alignment based on fast Fourier transform. *Nucleic Acids Res* 2002;**30**:3059–66.  
2873 doi:10.1093/nar/gkf436
- 2874 25 FastTree 2 – Approximately Maximum-Likelihood Trees for Large Alignments.  
2875 <https://journals.plos.org/plosone/article?id=10.1371/journal.pone.0009490> (accessed 23  
2876 Jul 2019).
- 2877 26 Bokulich NA, Kaehler BD, Rideout JR, *et al.* Optimizing taxonomic classification of marker-  
2878 gene amplicon sequences with QIIME 2's q2-feature-classifier plugin. *Microbiome*  
2879 2018;**6**:90. doi:10.1186/s40168-018-0470-z
- 2880 27 QIIME 2 Library. <https://library.qiime2.org/plugins/q2-feature-classifier/3/> (accessed 30  
2881 Dec 2021).
- 2882 28 F. Escapa I, Huang Y, Chen T, *et al.* Construction of habitat-specific training sets to achieve  
2883 species-level assignment in 16S rRNA gene datasets. *Microbiome* 2020;**8**:65.  
2884 doi:10.1186/s40168-020-00841-w
- 2885 29 diversity — QIIME 2 2020.8.0 documentation.  
2886 <https://docs.qiime2.org/2020.8/plugins/available/diversity/> (accessed 30 Dec 2021).

- 2887 30 R: The R Stats Package. [https://stat.ethz.ch/R-manual/R-](https://stat.ethz.ch/R-manual/R-devel/library/stats/html/00Index.html)  
2888 [devel/library/stats/html/00Index.html](https://stat.ethz.ch/R-manual/R-devel/library/stats/html/00Index.html) (accessed 12 Jan 2022).
- 2889 31 Anderson MJ. A new method for non-parametric multivariate analysis of variance. *Austral*  
2890 *Ecology* 2001;**26**:32–46. doi:10.1111/j.1442-9993.2001.01070.pp.x
- 2891 32 adonis function - RDocumentation.  
2892 <https://www.rdocumentation.org/packages/vegan/versions/2.4-2/topics/adonis> (accessed  
2893 15 Sep 2021).
- 2894 33 vegan-package: Community Ecology Package: Ordination, Diversity and... in vegan:  
2895 Community Ecology Package. <https://rdr.io/cran/vegan/man/vegan-package.html>  
2896 (accessed 12 Jan 2022).
- 2897 34 Mandal S, Van Treuren W, White RA, *et al.* Analysis of composition of microbiomes: a novel  
2898 method for studying microbial composition. *Microb Ecol Health Dis* 2015;**26**:27663.  
2899 doi:10.3402/mehd.v26.27663
- 2900 35 Segata N, Izard J, Waldron L, *et al.* Metagenomic biomarker discovery and explanation.  
2901 *Genome Biol* 2011;**12**:R60. doi:10.1186/gb-2011-12-6-r60
- 2902 36 Huttenhower C. Galaxy / Hutlab - Harvard. <http://huttenhower.sph.harvard.edu/galaxy/>  
2903 (accessed 19 Sep 2019).
- 2904 37 Mandal, Siddhartha. Research - Dr. Siddhartha Mandal: ANCOM 2.0 - updated code.  
2905 <https://sites.google.com/site/siddharthamandal1985/research> (accessed 19 Sep 2019).
- 2906 38 Kaul A, Mandal S, Davidov O, *et al.* Analysis of Microbiome Data in the Presence of Excess  
2907 Zeros. *Front Microbiol* 2017;**8**:2114. doi:10.3389/fmicb.2017.02114
- 2908 39 Mandal S, Van Treuren W, White RA, *et al.* Analysis of composition of microbiomes: a novel  
2909 method for studying microbial composition. *Microbial Ecology in Health & Disease* 2015;**26**.  
2910 doi:10.3402/mehd.v26.27663
- 2911 40 Lin FH. User Manual for ANCOM v2.1. 2022.<https://github.com/FrederickHuangLin/ANCOM>  
2912 (accessed 31 Jan 2022).
- 2913 41 Bates D, Mächler M, Bolker B, *et al.* Fitting Linear Mixed-Effects Models Using lme4. *Journal*  
2914 *of Statistical Software* 2015;**67**:1–48. doi:10.18637/jss.v067.i01
- 2915 42 PairedData.pdf. <https://cran.r-project.org/web/packages/PairedData/PairedData.pdf>  
2916 (accessed 1 Aug 2022).
- 2917 43 Bakdash JZ, Marusich LR. Repeated Measures Correlation. *Frontiers in Psychology*  
2918 2017;**8**.<https://www.frontiersin.org/article/10.3389/fpsyg.2017.00456> (accessed 15 Mar  
2919 2022).
- 2920 44 igraph – Network analysis software. <https://igraph.org/> (accessed 22 Jul 2022).
- 2921 45 Melo-Dias S, Valente C, Andrade L, *et al.* Saliva as a non-invasive specimen for COPD  
2922 assessment. *Respiratory Research* 2022;**23**:16. doi:10.1186/s12931-022-01935-9
- 2923

2924

2925 STROBE Statement—Checklist of items that should be included in reports of cohort  
2926 studies

|                              | <b>Item No</b> | <b>Recommendation</b>                                                                                                                                                                                                                        |
|------------------------------|----------------|----------------------------------------------------------------------------------------------------------------------------------------------------------------------------------------------------------------------------------------------|
| <b>Title and abstract</b>    | 1              | (a) Indicate the study’s design with a commonly used term in the title or the abstract<br><br><b>YES</b>                                                                                                                                     |
|                              |                | (b) Provide in the abstract an informative and balanced summary of what was done and what was found<br><br><b>YES</b>                                                                                                                        |
| <b>Introduction</b>          |                |                                                                                                                                                                                                                                              |
| Background/rationale         | 2              | Explain the scientific background and rationale for the investigation being reported <b>YES</b>                                                                                                                                              |
| Objectives                   | 3              | State specific objectives, including any prespecified hypotheses <b>YES</b>                                                                                                                                                                  |
| <b>Methods</b>               |                |                                                                                                                                                                                                                                              |
| Study design                 | 4              | Present key elements of study design early in the paper <b>YES</b>                                                                                                                                                                           |
| Setting                      | 5              | Describe the setting, locations, and relevant dates, including periods of recruitment, exposure, follow-up, and data collection<br><b>YES</b>                                                                                                |
| Participants                 | 6              | (a) Give the eligibility criteria, and the sources and methods of selection of participants. Describe methods of follow-up <b>YES</b>                                                                                                        |
|                              |                | (b) For matched studies, give matching criteria and number of exposed and unexposed <b>YES (detailed description in Supplementary file)</b>                                                                                                  |
| Variables                    | 7              | Clearly define all outcomes, exposures, predictors, potential confounders, and effect modifiers. Give diagnostic criteria, if applicable <b>YES (detailed description in Supplementary file)</b>                                             |
| Data sources/<br>measurement | 8*             | For each variable of interest, give sources of data and details of methods of assessment (measurement). Describe comparability of assessment methods if there is more than one group <b>YES (detailed description in Supplementary file)</b> |
| Bias                         | 9              | Describe any efforts to address potential sources of bias <b>YES (detailed description in Supplementary file)</b>                                                                                                                            |
| Study size                   | 10             | Explain how the study size was arrived at <b>n.a.</b>                                                                                                                                                                                        |
| Quantitative variables       | 11             | Explain how quantitative variables were handled in the analyses. If applicable, describe which groupings were chosen and why <b>YES (detailed description in Supplementary file)</b>                                                         |
| Statistical methods          | 12             | (a) Describe all statistical methods, including those used to control for confounding <b>YES (detailed description in Supplementary file)</b>                                                                                                |

|                   |     |                                                                                                                                                                                                                         |
|-------------------|-----|-------------------------------------------------------------------------------------------------------------------------------------------------------------------------------------------------------------------------|
|                   |     | (b) Describe any methods used to examine subgroups and interactions <b>YES (detailed description in Supplementary file)</b>                                                                                             |
|                   |     | (c) Explain how missing data were addressed <b>YES (detailed description in Supplementary file)</b>                                                                                                                     |
|                   |     | (d) If applicable, explain how loss to follow-up was addressed <b>YES (detailed description in Supplementary file)</b>                                                                                                  |
|                   |     | (e) Describe any sensitivity analyses <b>n.a.</b>                                                                                                                                                                       |
| <b>Results</b>    |     |                                                                                                                                                                                                                         |
| Participants      | 13* | (a) Report numbers of individuals at each stage of study—eg numbers potentially eligible, examined for eligibility, confirmed eligible, included in the study, completing follow-up, and analysed <b>YES</b>            |
|                   |     | (b) Give reasons for non-participation at each stage <b>YES</b>                                                                                                                                                         |
|                   |     | (c) Consider use of a flow diagram <b>n.a.</b>                                                                                                                                                                          |
| Descriptive data  | 14* | (a) Give characteristics of study participants (eg demographic, clinical, social) and information on exposures and potential confounders <b>YES</b>                                                                     |
|                   |     | (b) Indicate number of participants with missing data for each variable of interest <b>YES</b>                                                                                                                          |
|                   |     | (c) Summarise follow-up time (eg, average and total amount) <b>YES</b>                                                                                                                                                  |
| Outcome data      | 15* | Report numbers of outcome events or summary measures over time                                                                                                                                                          |
| Main results      | 16  | (a) Give unadjusted estimates and, if applicable, confounder-adjusted estimates and their precision (eg, 95% confidence interval). Make clear which confounders were adjusted for and why they were included <b>YES</b> |
|                   |     | (b) Report category boundaries when continuous variables were categorized <b>YES</b>                                                                                                                                    |
|                   |     | (c) If relevant, consider translating estimates of relative risk into absolute risk for a meaningful time period <b>n.a</b>                                                                                             |
| Other analyses    | 17  | Report other analyses done—eg analyses of subgroups and interactions, and sensitivity analyses <b>YES</b>                                                                                                               |
| <b>Discussion</b> |     |                                                                                                                                                                                                                         |
| Key results       | 18  | Summarise key results with reference to study objectives <b>YES</b>                                                                                                                                                     |
| Limitations       | 19  | Discuss limitations of the study, taking into account sources of potential bias or imprecision. Discuss both direction and magnitude of any potential bias <b>YES</b>                                                   |
| Interpretation    | 20  | Give a cautious overall interpretation of results considering objectives, limitations, multiplicity of analyses, results from similar studies, and other relevant evidence <b>YES</b>                                   |

|                  |    |                                                                                     |
|------------------|----|-------------------------------------------------------------------------------------|
| Generalisability | 21 | Discuss the generalisability (external validity) of the study results<br><b>YES</b> |
|------------------|----|-------------------------------------------------------------------------------------|

---

**Other information**

|         |    |                                                                                                                                                                          |
|---------|----|--------------------------------------------------------------------------------------------------------------------------------------------------------------------------|
| Funding | 22 | Give the source of funding and the role of the funders for the present study and, if applicable, for the original study on which the present article is based <b>YES</b> |
|---------|----|--------------------------------------------------------------------------------------------------------------------------------------------------------------------------|

---

2927

2928 \*Give information separately for exposed and unexposed groups.

2929

2930 **Note:** An Explanation and Elaboration article discusses each checklist item and gives methodological  
2931 background and published examples of transparent reporting. The STROBE checklist is best used in  
2932 conjunction with this article (freely available on the Web sites of PLoS Medicine at  
2933 <http://www.plosmedicine.org/>, Annals of Internal Medicine at <http://www.annals.org/>, and Epidemiology  
2934 at <http://www.epidem.com/>). Information on the STROBE Initiative is available at [http://www.strobe-](http://www.strobe-statement.org)  
2935 [statement.org](http://www.strobe-statement.org).

2936

2937

Summary of DECONTAM results performed with the prevalence method and a threshold of 0.5 for identification of contaminants in the dataset.

| ASV code                          | Prevalence in samples | Score                 | Contaminant |
|-----------------------------------|-----------------------|-----------------------|-------------|
| f65ef8a64333fc9aa05887b2aa16f257  | 30                    | 4.93566934530699E-35  | TRUE        |
| 8c8598245ea67244fb156b6f31192a41  | 51                    | 6.55556091875317E-22  | TRUE        |
| 4bb2a60ebd87faa796298b17bcc4ebef  | 122                   | 7.12476858009646E-20  | TRUE        |
| 6c891abaa8f2147383dd332e601800eb  | 25                    | 5.64462712512244E-19  | TRUE        |
| 073d0c62d1257a783d7508c138432fc4  | 22                    | 5.95502824269748E-19  | TRUE        |
| 609cfe075d3af9506da2e29b0db659fe  | 20                    | 8.07960447514411E-17  | TRUE        |
| 20ad5b343a158e617aa2f39adb0f05b6  | 18                    | 1.29146710631416E-12  | TRUE        |
| e191f1f77e171985e4ce4e16cfd52089  | 11                    | 1.13823341316519E-11  | TRUE        |
| 39032f4b6765815d5012773e6807e4be  | 14                    | 1.98170460521423E-11  | TRUE        |
| d65886bee0f292fbbf5fc64ff1bc0b24  | 221                   | 1.6692749528622E-10   | TRUE        |
| fd657e81a8537d9ff329c0703a0f7f63  | 10                    | 1.72962979000839E-10  | TRUE        |
| 20cbb7a8b00c1670d0175f2d742e655b  | 9                     | 2.52133562311872E-09  | TRUE        |
| 217791e2b9f75aa3915ad540e35c3612  | 13                    | 1.0669565420676E-08   | TRUE        |
| 54be6aa07bc71272df3048332e7f0cc   | 6                     | 7.05006830680515E-08  | TRUE        |
| fd2b0b0983f5c7a61e3117545344180c  | 12                    | 1.19572186337503E-07  | TRUE        |
| d23fbef2f31d48eda40876cdbc49933a  | 194                   | 2.32906586692203E-07  | TRUE        |
| 574d164310944193d8fc13cd10346e58  | 45                    | 3.99850620766581E-07  | TRUE        |
| 1db319dd24afdc2890163fd4cf776e0   | 7                     | 0.0000004703898033813 | TRUE        |
| 8fbb45639f32c85085e06660994f7ae   | 7                     | 0.0000004703898033813 | TRUE        |
| 083310805ab3a26fd0b20219868d894b  | 10                    | 4.78885615151771E-07  | TRUE        |
| 11f63e800d538ce61113253faf0f0363  | 10                    | 4.78885615151771E-07  | TRUE        |
| e15cb616bbfc94e116f873ba1b50aabc  | 10                    | 4.78885615151771E-07  | TRUE        |
| ed7a396f4b38c1b98b597e923ae53f22  | 5                     | 1.04469193996803E-06  | TRUE        |
| e941a4a1ad9617d44833702de4f0ca82  | 5                     | 1.04469193996803E-06  | TRUE        |
| 2bbd06be7ee1e2cef688d5d3b880053f  | 5                     | 1.04469193996803E-06  | TRUE        |
| fca9741d7bcd137ad78a45a0f50c3b6   | 30                    | 1.36535722961629E-06  | TRUE        |
| 5785bb04044f25bd01768aa97d019b2e  | 8                     | 1.79321917846439E-06  | TRUE        |
| 8f09bac714c02dc9415770271349dc99  | 196                   | 1.80482872811538E-06  | TRUE        |
| 77c55b0f6c379835576843f02171325   | 17                    | 4.57816661895207E-06  | TRUE        |
| 05592ceac1f1697c9020de02157cec66  | 6                     | 5.98614890787024E-06  | TRUE        |
| 1187d3f6bbc3c560b79f47cf9ad873bd  | 49                    | 9.12411188077238E-06  | TRUE        |
| c7ef526f7263c4a3683d096b6748a0fb  | 4                     | 0.0000150558544296955 | TRUE        |
| 98bc1ec29a4c0f9bf70d7bfa48a48b6   | 4                     | 0.0000150558544296955 | TRUE        |
| 1ea83794b96a00695927de44a90aa26d  | 4                     | 0.0000150558544296955 | TRUE        |
| d8f298ecc87fa0854033cac0ce4baca   | 4                     | 0.0000150558544296955 | TRUE        |
| 9ab98702e9cf7c27aa339109ea3e689   | 4                     | 0.0000150558544296955 | TRUE        |
| 57ef5006312a9662d87d57c1404c1a87  | 7                     | 0.0000200061185749385 | TRUE        |
| 548c3f420c3c6a1eb10f35aed1be00c1  | 7                     | 0.0000200061185749385 | TRUE        |
| eefaf42aa3481703873ea5b975cca9bf  | 15                    | 0.0000200562316647648 | TRUE        |
| 6ba560a76661744bc65eed04953c1314  | 5                     | 0.0000721451963282275 | TRUE        |
| 7f1487c191bfa6ccc9085821aadf4324  | 65                    | 0.0000897630873541179 | TRUE        |
| 891019e319f5d8d088ed4f9379f63ef   | 208                   | 0.000164834348740025  | TRUE        |
| ec9d0f20c8c61eb5032d07937cf1af3c  | 6                     | 0.000207385864939935  | TRUE        |
| 0a738d348f5e152a2521b6eb922ef446  | 6                     | 0.000207385864939935  | TRUE        |
| 365bc413ed3cf82d873793b95581c3cc  | 6                     | 0.000207385864939935  | TRUE        |
| 791ca5935b55de1be66b9c83d56e4167  | 3                     | 0.000211212129284659  | TRUE        |
| c873733a1c472c123f8063297a02c773  | 3                     | 0.000211212129284659  | TRUE        |
| 42a8ef3012c07a08df6bbaef0273cbb   | 3                     | 0.000211212129284659  | TRUE        |
| a20597397ea624f1d40736bbb973dff1  | 3                     | 0.000211212129284659  | TRUE        |
| ee02b9d7321d96af270ccd201ba17b6b  | 3                     | 0.000211212129284659  | TRUE        |
| 048633e2cfb6cd41a06beacf26f04cb6  | 3                     | 0.000211212129284659  | TRUE        |
| 6fad8c2ce33939380ddb960da7f411c1  | 3                     | 0.000211212129284659  | TRUE        |
| f075744cdedbbec727c7e1b2037c3e6   | 3                     | 0.000211212129284659  | TRUE        |
| 30554407069b2367b77ee68c1982db14  | 3                     | 0.000211212129284659  | TRUE        |
| b2bba50ae5022b13d0cd6641814e0713  | 3                     | 0.000211212129284659  | TRUE        |
| 79544aab951bcf5f54f663c1dc3f2912  | 3                     | 0.000211212129284659  | TRUE        |
| b83aaa7e85c9c03fa9485e12be27116b  | 3                     | 0.000211212129284659  | TRUE        |
| e58f4afd38d5d2317e576701eac632a4  | 3                     | 0.000211212129284659  | TRUE        |
| 8d3565638a5a89a00aa3233b2b027489  | 4                     | 0.000814736808279286  | TRUE        |
| 7bae376e41b6259952179d259f069c1e  | 4                     | 0.000814736808279286  | TRUE        |
| 5b84f9aefbea73054bcb5ebbf3904893  | 4                     | 0.000814736808279286  | TRUE        |
| a8a7c72cd7f5319290396ea098c97020  | 4                     | 0.000814736808279286  | TRUE        |
| e6f6be4ccfb278fe562ca7dffbe543652 | 9                     | 0.00153092250680292   | TRUE        |
| 32cfd0837255fb3842fc282e432ec52   | 9                     | 0.00153092250680292   | TRUE        |
| e795fed13ead27da7c3bedd15b4a59c1  | 5                     | 0.00196365213243004   | TRUE        |
| a5e3cfb18eb2fd335108bf5b8d60b739  | 5                     | 0.00196365213243004   | TRUE        |
| d62009c3d7662c9c54d23242713f314e  | 2                     | 0.00288656576689034   | TRUE        |
| d5695af3afad7256ad94ba6a38ccd4fb  | 2                     | 0.00288656576689034   | TRUE        |
| e2fcc92ed4f145071525b58f2f750e39  | 2                     | 0.00288656576689034   | TRUE        |
| e55f7fddc508fc02e0ce54bfb21e6038  | 2                     | 0.00288656576689034   | TRUE        |
| 7fa99bd3ee34c6d339e3ff01bd88427e  | 2                     | 0.00288656576689034   | TRUE        |
| 0eb8e63cb8f7cb7aa58b403dc29da7de  | 2                     | 0.00288656576689034   | TRUE        |
| 464a52deb6e8c4e2b57d980a8d18f04c  | 2                     | 0.00288656576689034   | TRUE        |
| 2d34c22edce4b1f2d8a5228ad78f8ea8  | 2                     | 0.00288656576689034   | TRUE        |
| 6a9e6cd156ec3e7ca51f4912bfe49614  | 2                     | 0.00288656576689034   | TRUE        |
| da8b2afed60ab7f62166e969e4322f11  | 6                     | 0.0037851032560835    | TRUE        |
| f92c2786afd33f8c9eddd65bcb666f42  | 18                    | 0.00487193302555845   | TRUE        |
| 50a3b56e0b7db75ee9dacc7a751ba41   | 19                    | 0.00630479812169273   | TRUE        |
| 84716245f53ab2236b84538a9cdd74ed  | 7                     | 0.0063823686613895    | TRUE        |
| ed2e115df9ed4a9cf8de15df330c428e  | 262                   | 0.00647182724575958   | TRUE        |



|                                   |     |                     |      |
|-----------------------------------|-----|---------------------|------|
| cfeb33d30aa1b73ecca815bc65ff35f0  | 3   | 0.00844848517138625 | TRUE |
| 038cda24080464defef44077e55d614a  | 3   | 0.00844848517138625 | TRUE |
| 1772eec427522cda596e760ad3ebef61  | 3   | 0.00844848517138625 | TRUE |
| a5d1217aa1cbc154c499796f9040d954  | 14  | 0.00977619312112795 | TRUE |
| 6628b08e13117c52417f5dfec4e9eafd  | 8   | 0.00983688431712284 | TRUE |
| b4587918bfe7955deb4fe9932ec07c3d  | 4   | 0.0164745460842033  | TRUE |
| 2ce83ce8633190af0e5f51af6c6d7da8  | 4   | 0.0164745460842033  | TRUE |
| 31de871bad103340eaac73b2383506fe  | 10  | 0.0195459279544366  | TRUE |
| b57744bd30af97a4d538d0aba27596b   | 11  | 0.0258714571922254  | TRUE |
| d50706f84ad2be04b147f0a3b36039d3  | 5   | 0.0267556257599366  | TRUE |
| 1fa7e42cad8192ac5a0f3e2319fb1089  | 5   | 0.0267556257599366  | TRUE |
| 7b922bd11ea3f2de8a1d01bc0314871f  | 438 | 0.0311556538676718  | TRUE |
| bc3d8f06abbef83820be7ab8cc2eb279  | 6   | 0.0390864277175264  | TRUE |
| 0d57a518ec5291ce0ee0643456940a90  | 38  | 0.0399684744186126  | TRUE |
| 1369aba02dd8b749b4c4c2a799d34207  | 13  | 0.0415311220541261  | TRUE |
| 107aa7e6b56274803bffdc1cfff5b2ee6 | 14  | 0.050854414641935   | TRUE |
| d353248c8a7d31bc9f8378a320b77924  | 14  | 0.050854414641935   | TRUE |
| 8bc54d575f88d09b2ba16b7f571812ae  | 31  | 0.0517381435573177  | TRUE |
| 6ba7d4f61fd8143e8aa85659c09b9dd   | 7   | 0.0523669077242673  | TRUE |
| 4908017090823380efa89d3e236c811e  | 33  | 0.0655854886123842  | TRUE |
| dc8201773df81f21b280e07af320208   | 8   | 0.0691034263704471  | TRUE |
| 1ea779464fee4aab61b2adbe93db1d13  | 8   | 0.0691034263704471  | TRUE |
| 7bfaa7f90dff6c876675062e176f2b47  | 8   | 0.0691034263704471  | TRUE |
| 4dd2f7772c7e05fe793cb8d593a59dd0  | 8   | 0.0691034263704471  | TRUE |
| 642137de3ea503ff59288deb908c51fa  | 8   | 0.0691034263704471  | TRUE |
| aeb091a4d196e216c7ed9c8cc29f36a8  | 8   | 0.0691034263704471  | TRUE |
| 67cea148133734a4183fb020f6740b4e  | 2   | 0.0769230769230769  | TRUE |
| 83e8f941ebfaf966ed1b7d81e21e43a6  | 2   | 0.0769230769230769  | TRUE |
| 403c354ef8601d5aba74b7ee78058e87  | 2   | 0.0769230769230769  | TRUE |
| 0d3f7fbbeccd21fbb5aa31e55f638069  | 2   | 0.0769230769230769  | TRUE |
| 508b4814a200ebb7843f78be4251e05   | 2   | 0.0769230769230769  | TRUE |
| 3caf30133a391f2f85e2365d24923375  | 2   | 0.0769230769230769  | TRUE |
| d630cbac6a5674e8efe19b8a32751f57  | 2   | 0.0769230769230769  | TRUE |
| 65dfa12d95100cd914a50aa14ab0c74e  | 2   | 0.0769230769230769  | TRUE |
| 33c14b40a4d663250dffefdb3ce1f5b4  | 2   | 0.0769230769230769  | TRUE |
| 8e364327698c6e82d690bae5d042c737  | 2   | 0.0769230769230769  | TRUE |
| 80feb2fb070545be75f78cbd6b520d5f  | 2   | 0.0769230769230769  | TRUE |
| 8253a32e37cc65a796a92ee6b750d870  | 17  | 0.0845266956187741  | TRUE |
| 8fcdcca36d7698798f6aa46b028ac8f7  | 9   | 0.0864096619651255  | TRUE |
| b0d5a4ec8e74ac4c6cb4ecb9d06183d8  | 9   | 0.0864096619651255  | TRUE |
| 415033681d70ab871d00f8e199d5485d  | 9   | 0.0864096619651255  | TRUE |
| 3dd272f8e982d693ab208a7fd3552074  | 9   | 0.0864096619651255  | TRUE |
| 536bca28d3d53844b1880b427e53dcc   | 10  | 0.105007314060969   | TRUE |
| 5c96ec70d2839b27eb48f2226c96e2ca  | 10  | 0.105007314060969   | TRUE |
| 4a765a31e0cf23936b0d98af5fb07b81  | 3   | 0.115173403255331   | TRUE |
| 9cd7f253e5f398b99b607964de56e802  | 3   | 0.115173403255331   | TRUE |
| 006447e914f38b29a86b92aab7b8145d  | 3   | 0.115173403255331   | TRUE |
| e07ec8b4bb1731226c8bbe954aa9dfd7  | 3   | 0.115173403255331   | TRUE |
| 495baebe669e1a07a3638212d694929c  | 3   | 0.115173403255331   | TRUE |
| b32b830756e43af68ac23a4f88d98118  | 3   | 0.115173403255331   | TRUE |
| ba14674a604faae7a83e0ab9d7151dcd  | 49  | 0.115653659271681   | TRUE |
| df6485f0c59f870ffa34796e56205884  | 4   | 0.153031417037874   | TRUE |
| 6836e6f80ca06e620471efbe1f47dffe  | 4   | 0.153031417037874   | TRUE |
| 2700db6dd1459de93b072b5f8f90c146  | 4   | 0.153031417037874   | TRUE |
| 8089fc5cea667447a21f0c665b788e9c  | 4   | 0.153031417037874   | TRUE |
| 872d11b3c9c9e72c129296b6ab82e76a  | 4   | 0.153031417037874   | TRUE |
| 776b3cb9d774b6e0c45c45cc1764f1b   | 4   | 0.153031417037874   | TRUE |
| 0d87b112bc336b97248bf4757a668689  | 4   | 0.153031417037874   | TRUE |
| 1bfdcd56f0549c7953359140bbdc64b1  | 13  | 0.166895948842549   | TRUE |
| d372b6450fe1d69ae6cb673dfafdc6d   | 14  | 0.18905177036381    | TRUE |
| 490a5a0203d6a3ce512fe7566a89299c  | 5   | 0.190342995483322   | TRUE |
| 546a3202fd799a7240d2592ac0444502  | 5   | 0.190342995483322   | TRUE |
| 1b18df940027dc40b173be56b5b2c39a  | 5   | 0.190342995483322   | TRUE |
| 8cd7646d4eee2b702e680c9a36aa93ee  | 5   | 0.190342995483322   | TRUE |
| e3064dc22ea1c1084cae7e065ec8305c  | 35  | 0.19916119737622    | TRUE |
| 074478577353df0840cde9827351d2e9  | 15  | 0.211740989485119   | TRUE |
| a022ba393ceb3a7e109b171c5e901b31  | 15  | 0.211740989485119   | TRUE |
| 1189d4ef3af60ba943cc73161a4097a9  | 15  | 0.211740989485119   | TRUE |
| 7e06f6f4c9c89933a432f36767cf8f5c  | 6   | 0.226978141364239   | TRUE |
| 16357c104069b5c62302e913480dce46  | 6   | 0.226978141364239   | TRUE |
| 127b623fd88482c6bf125beda04dba52  | 6   | 0.226978141364239   | TRUE |
| 8b2b5fea59a9f7c4b75b285985f8bc45  | 6   | 0.226978141364239   | TRUE |
| 9cd232a91d762e72b8695ef807e4b595  | 6   | 0.226978141364239   | TRUE |
| 56d2f08c47e1fe5e8b11c758e3df45c4  | 6   | 0.226978141364239   | TRUE |
| 7cbcb853e8b0fc4e4ae9ad8a8893a7df  | 6   | 0.226978141364239   | TRUE |
| 42ae34a9e758d6ba2c23b9e32be90e80  | 6   | 0.226978141364239   | TRUE |
| d0fd1a04107c82982b655553b7bcf41   | 6   | 0.226978141364239   | TRUE |
| b558365592f7a8d645f69873f6cda354  | 6   | 0.226978141364239   | TRUE |
| e78a758dd0cf4ecdeec205371b214817  | 6   | 0.226978141364239   | TRUE |
| 262dc7bf78e937b0c7065aef82e18d08  | 6   | 0.226978141364239   | TRUE |
| 53e1b42a26f12c7056f1acb645630a26  | 6   | 0.226978141364239   | TRUE |
| 74d8b8501ebe056c7685c5f09a15ad1d  | 6   | 0.226978141364239   | TRUE |

|                                   |     |                   |       |
|-----------------------------------|-----|-------------------|-------|
| 6e5eea14c8f71331e69a36f9df2e47cf  | 6   | 0.226978141364239 | TRUE  |
| e52a5d6f0e2560fe327b2f502dd5a024  | 6   | 0.226978141364239 | TRUE  |
| 8aa02408859b45f0f98146372cdf479   | 6   | 0.226978141364239 | TRUE  |
| 2cb9077e3906b643acc06d7bf5c82e57  | 175 | 0.235878918358532 | TRUE  |
| 6145f51f090994c4a43f7cea73f90091  | 17  | 0.2582325274065   | TRUE  |
| e269d8c81692a109f5be5e0d96cc45f4  | 17  | 0.2582325274065   | TRUE  |
| d5cd3fcdfc36006692274229875ace16  | 7   | 0.262828389827809 | TRUE  |
| 168860bd1024ae270960f35b81de4cc3  | 7   | 0.262828389827809 | TRUE  |
| 029af632b2cc681c2baac604bcb1d0f87 | 7   | 0.262828389827809 | TRUE  |
| 7840fd72d5760bf9d7c7d6e05e15b1d   | 7   | 0.262828389827809 | TRUE  |
| ca3d5ad542f41c1b2dca122a276dd68e  | 7   | 0.262828389827809 | TRUE  |
| ec5b70612ab541270f99ac9ccb03c57a  | 7   | 0.262828389827809 | TRUE  |
| 5ec80473635e19defc7cb89911f32028  | 7   | 0.262828389827809 | TRUE  |
| bfe54af4c9180d37a0d76f6dafa79a5a  | 7   | 0.262828389827809 | TRUE  |
| 527f393f41091fdc92723873b3f241f4  | 7   | 0.262828389827809 | TRUE  |
| 4dfc1ccde14bb2c6f22c28071d19002d  | 7   | 0.262828389827809 | TRUE  |
| efb8602f3d0765aa09b975799823da9   | 7   | 0.262828389827809 | TRUE  |
| 5406ba4d58928df06e4f23d5a090f3d3  | 7   | 0.262828389827809 | TRUE  |
| 65a39bc08ea93ac99b021f4dc1850237  | 7   | 0.262828389827809 | TRUE  |
| bd2ebc70501f7d867c204f94c4e483da  | 391 | 0.277100555069908 | TRUE  |
| 340d2fc0f9822e35f88b16537341315c  | 8   | 0.297804452748937 | TRUE  |
| 8c416f8840299049567cb009734c133d  | 8   | 0.297804452748937 | TRUE  |
| 668fdb718997fc1589c7817655d4bb5f  | 8   | 0.297804452748937 | TRUE  |
| 53d5533a6429e4aa7d6998450efe4a0b  | 8   | 0.297804452748937 | TRUE  |
| 1ebadfa667c9a909e90f32ae471aee3b  | 8   | 0.297804452748937 | TRUE  |
| 4fbbe364adcd3e3a84f51a161ebfa54b7 | 8   | 0.297804452748937 | TRUE  |
| 7124e1c5c05a47eade99eb30e14ca10d  | 8   | 0.297804452748937 | TRUE  |
| b2487c386ddc1a950ba23034e0d108ba  | 53  | 0.298909268067355 | TRUE  |
| a71d241034f123d92d2460ffa097445   | 19  | 0.305485539889719 | TRUE  |
| d8ecd05fc246253fa7171e885a429464  | 20  | 0.329158787407426 | TRUE  |
| 986d1160fa2c6d6e1b39adda581cbd09  | 9   | 0.331834080910981 | TRUE  |
| b474087ebf36a250a0d6e688aac9b18   | 9   | 0.331834080910981 | TRUE  |
| de0880c59770b57d7bce7a58c29a63a4  | 9   | 0.331834080910981 | TRUE  |
| 37bea876591b5db836c3cf500aeb2c4b  | 9   | 0.331834080910981 | TRUE  |
| 743877d0dd17489090dfcc618262fe52  | 9   | 0.331834080910981 | TRUE  |
| 2967fc5e7264a9da63556dc7aa011846  | 10  | 0.364860125823334 | TRUE  |
| 29edd9d99bdeb69d7f7425b1fd0ba57e  | 10  | 0.364860125823334 | TRUE  |
| 2e1a0c95b8b627148e4efc1a2e2124d3  | 10  | 0.364860125823334 | TRUE  |
| 0bb1c8431343726b5826ba41bceb2deb  | 10  | 0.364860125823334 | TRUE  |
| 69c82a0446a784e0f628baba67a71a38  | 76  | 0.379808917624895 | TRUE  |
| 73bf8d1a5983e34a0cb84e3cae127815  | 433 | 0.382965201505468 | TRUE  |
| ef5b1d86471ba81aeaf0675cb5f133b6  | 11  | 0.396838784394777 | TRUE  |
| 22c8e6e55e7d3f64fc2fdf7b5cc181a2  | 11  | 0.396838784394777 | TRUE  |
| 6b0ff3b95f5a0170f8cf05f2d648be69  | 11  | 0.396838784394777 | TRUE  |
| 0047d48fbaf4753f25019037f802349   | 11  | 0.396838784394777 | TRUE  |
| c48ebcb64a879ac3131a8157726e0ce1  | 11  | 0.396838784394777 | TRUE  |
| 5d6ee23084c6b9c96deb9a83295abc8a  | 78  | 0.408454653042303 | TRUE  |
| e370166a24f9ddb12cc92317e714f124  | 12  | 0.42773801098847  | TRUE  |
| 44beba34c62eb03966645efddedf0d9   | 12  | 0.42773801098847  | TRUE  |
| a32083174848f3d175ed977dc8eed9e9  | 12  | 0.42773801098847  | TRUE  |
| f5d0c756653e860f49eb2ef329840519  | 12  | 0.42773801098847  | TRUE  |
| c6357b5b5bb8c067c51faad5180b4e99  | 12  | 0.42773801098847  | TRUE  |
| 40e44aab0f468d14cc6f40ebef19cb0   | 12  | 0.42773801098847  | TRUE  |
| b1e1799fee04670207c1b71957c46d15  | 12  | 0.42773801098847  | TRUE  |
| 03d52421a28d9b73c5d1716eb520718b  | 12  | 0.42773801098847  | TRUE  |
| 22357830cad050ff79bf4e8f8488beb6  | 12  | 0.42773801098847  | TRUE  |
| 147e062a32552d807a7a72da18b5c56b  | 12  | 0.42773801098847  | TRUE  |
| 508524d40fa1145d6023b5a43a013f4c  | 12  | 0.42773801098847  | TRUE  |
| 70e81e8f3ec3fdc237118834836a5ff0  | 12  | 0.42773801098847  | TRUE  |
| ab4429b988a4f6fc70f599b57a966c47  | 12  | 0.42773801098847  | TRUE  |
| 677929eac52be081cdae08a0b99c70eb2 | 37  | 0.435706683699951 | TRUE  |
| 55e6f47ff8b1dc2064c0182bc4f831a3  | 13  | 0.457536082595734 | TRUE  |
| b68071682d3bd6beb1a552c2500791cc  | 13  | 0.457536082595734 | TRUE  |
| 48d9602985017b3a08622909440fcc9   | 13  | 0.457536082595734 | TRUE  |
| a36165e53c5432cedc59fba58c989704  | 13  | 0.457536082595734 | TRUE  |
| e3acd1847381805fd9cf7f67f238c142  | 13  | 0.457536082595734 | TRUE  |
| 7d17d197d7978be0b6684209ce257e20  | 51  | 0.460922442542212 | TRUE  |
| 1f4f4a82b05eecd5361047345201e66e  | 26  | 0.467192815197644 | TRUE  |
| f81aae39d658f14666bbd39fe410294e  | 26  | 0.467192815197644 | TRUE  |
| 165cd1982e320b427a4cfa307f787b38  | 14  | 0.486220303988033 | TRUE  |
| f90e88c52df1bc147bfe9705270cb88f  | 14  | 0.486220303988033 | TRUE  |
| 6f517a2da49d22439a74d5297bdb654f  | 14  | 0.486220303988033 | TRUE  |
| f342485eb28655371ab95467e436666b  | 27  | 0.489003842984167 | TRUE  |
| 436e7f204759c2f369afb864438d1262  | 14  | 0.5               | FALSE |
| c205d0ee4db8c2c892ebe949b0a069da  | 67  | 0.5               | FALSE |
| 38a149a8cc59529f0b4ce29d6a838176  | 162 | 0.500000000000001 | FALSE |
| 7fae0a4914d95fd2426aa8a2ea9ef487  | 236 | 0.500000000000001 | FALSE |
| 0cbf8d071fa1320c4a225b51196da078  | 85  | 0.506863732942227 | FALSE |
| addf71722210dc7bcd173e43b0aae60   | 28  | 0.510360069573429 | FALSE |
| 9ceae8fed3a46d7b83b2131a74cedb29  | 15  | 0.513785840746033 | FALSE |
| 345b2e2f68d0022bf201b41dbd25743a  | 15  | 0.513785840746033 | FALSE |
| 7ed82ab99601f839d82875a9fed6caec  | 16  | 0.540234669026948 | FALSE |

|                                  |     |                   |       |
|----------------------------------|-----|-------------------|-------|
| 3081ffab8e3fff703f35599f9e5571c4 | 16  | 0.540234669026948 | FALSE |
| ce0fe9dd4a105852b029c2ab1d997024 | 56  | 0.541776569825547 | FALSE |
| c112b3dc575ef3b721464d0b49daa905 | 43  | 0.545307707097171 | FALSE |
| 0dc8e0e89e89cf4f0c71808666f6c6e7 | 30  | 0.551591656513902 | FALSE |
| f03dff2e63efb9a0dbc617ffa6fe0a   | 76  | 0.564343462092671 | FALSE |
| 44c386760dcb28e8af3b9847120c5d76 | 17  | 0.565574631822175 | FALSE |
| 1b158b8b2922d4fca5d59cea607cbb7d | 299 | 0.568562781856852 | FALSE |
| ee32615285e3f0dfe911611dbd723a22 | 2   | 0.574036511156187 | FALSE |
| bd8963179f96afda80d644b420b327ef | 2   | 0.574036511156187 | FALSE |
| 495cda065a2ac9820db531b20e15aa1a | 2   | 0.574036511156187 | FALSE |
| 59ebca98884af4ca79e99f56319810e6 | 2   | 0.574036511156187 | FALSE |
| 651b456fad22829867a61aff2a233caa | 2   | 0.574036511156187 | FALSE |
| 40e9bb5ebb3c3102bb2bb4efe90a3a91 | 2   | 0.574036511156187 | FALSE |
| 2af0887c08fc8372e9894be7dd331020 | 2   | 0.574036511156187 | FALSE |
| fc49e88a96a3582603047d56f9834715 | 2   | 0.574036511156187 | FALSE |
| b76be88631fc1577ea62514ea6ad5be  | 2   | 0.574036511156187 | FALSE |
| ece6618fc76d78380d6aa565960048f5 | 2   | 0.574036511156187 | FALSE |
| 746cc895942c2f16e6f9e05d9a912f00 | 2   | 0.574036511156187 | FALSE |
| d3326adfc4e7e9d8ea929cc2b5ced9f9 | 2   | 0.574036511156187 | FALSE |
| ea0a6f4d4e904f8f2d74612da65f602  | 2   | 0.574036511156187 | FALSE |
| 569333c671b24e2363d54e4671bb4cfd | 2   | 0.574036511156187 | FALSE |
| eadced2b44e8b968c557dfd8b5ac02dc | 2   | 0.574036511156187 | FALSE |
| 329dade18db9c95dd219f5689ee777a3 | 2   | 0.574036511156187 | FALSE |
| 2613b77df8ce69292ad18bac50100be6 | 2   | 0.574036511156187 | FALSE |
| 45c9cc46f257ba8de190eedb3dda5a36 | 2   | 0.574036511156187 | FALSE |
| 5c596a361996ea8d199802e4e34a6dee | 2   | 0.574036511156187 | FALSE |
| 5bbe0a3078b4537152c396ef08fe6e78 | 2   | 0.574036511156187 | FALSE |
| fbe5f855d23b47ec4e757e0fa3818ce5 | 2   | 0.574036511156187 | FALSE |
| acd5713a39bbcb804b886f98694671b7 | 2   | 0.574036511156187 | FALSE |
| 3a247cedad2882a4fd1104f0ab9a65ca | 2   | 0.574036511156187 | FALSE |
| 0bd637004516b97302a1f56e4f4d337a | 2   | 0.574036511156187 | FALSE |
| 146bc18aaafd9fc303f5cc2870c8e52  | 2   | 0.574036511156187 | FALSE |
| bd4660e763464929bf79b4eeea699730 | 2   | 0.574036511156187 | FALSE |
| c54410317ca2d9aa7aa88daa1147b46e | 2   | 0.574036511156187 | FALSE |
| dcc015b723865292b60a75224f821f71 | 2   | 0.574036511156187 | FALSE |
| 0360a55d85a1a3707023ff92cd73f805 | 2   | 0.574036511156187 | FALSE |
| 49b154d4c99e12186f73403e5ee94e83 | 2   | 0.574036511156187 | FALSE |
| 8c186c80797f8c256dc61aef623d3411 | 2   | 0.574036511156187 | FALSE |
| bd6a338d9c0a72f4b1a8410f16b85232 | 2   | 0.574036511156187 | FALSE |
| a2068af49962d42e50ab5c8a0b744b71 | 2   | 0.574036511156187 | FALSE |
| 2f08fd7c00722cdaeb01512616c093a5 | 2   | 0.574036511156187 | FALSE |
| b76404fb4d67434e693101ad1595767c | 2   | 0.574036511156187 | FALSE |
| e20f803f58f5ce46feabb0516cd02431 | 2   | 0.574036511156187 | FALSE |
| acffff1db4fa874c7ff9e2825dd29a4b | 2   | 0.574036511156187 | FALSE |
| 39e98dd4e807cd97e92b9f2169caf9f  | 2   | 0.574036511156187 | FALSE |
| 791618ea7f777b9c2e7f908eebc1f2a1 | 2   | 0.574036511156187 | FALSE |
| 919de377b64f65dd94f18d0fca292bac | 2   | 0.574036511156187 | FALSE |
| dbf82288883244531ea0b57e2ed04a2a | 2   | 0.574036511156187 | FALSE |
| 6b4fab5c304a37dd85146749d0028d87 | 2   | 0.574036511156187 | FALSE |
| 66c196e506f48ac22b611efac4a498d7 | 2   | 0.574036511156187 | FALSE |
| 981823f8c26086d499b6917a34f5961c | 2   | 0.574036511156187 | FALSE |
| 20fc8421a8c7570128653af9f9e5c63  | 2   | 0.574036511156187 | FALSE |
| 9d73ad67d5a5acbf511c78c859272821 | 2   | 0.574036511156187 | FALSE |
| e5abe350b1c88e1126e9074c6e93ef15 | 2   | 0.574036511156187 | FALSE |
| b3d6fcd212a9fd5fde39a3d79fee2faa | 2   | 0.574036511156187 | FALSE |
| 1730d6157fef2851906040de8a99d96b | 2   | 0.574036511156187 | FALSE |
| dc40f19361b9081547655a601487f5ae | 2   | 0.574036511156187 | FALSE |
| 3ed213ab80d34478dfc82075098049d  | 2   | 0.574036511156187 | FALSE |
| ccea7446425ef2321bda5cb26650e0df | 2   | 0.574036511156187 | FALSE |
| 97e91a44d9196a4f419d23186ef530bc | 2   | 0.574036511156187 | FALSE |
| 480018a3dae196593b9153ec81e6d9dd | 2   | 0.574036511156187 | FALSE |
| e13ef43b8d2b3a52b013425e712fbf02 | 2   | 0.574036511156187 | FALSE |
| a70bdbc2f74cab32c202b027329fef19 | 2   | 0.574036511156187 | FALSE |
| bdb6ca07b4442f773d274bb49ef6a218 | 2   | 0.574036511156187 | FALSE |
| 000e38f477632fa6299901badf2e0f06 | 2   | 0.574036511156187 | FALSE |
| 70d3445bf16d2a93bcc75728b6d56c4b | 2   | 0.574036511156187 | FALSE |
| 0c72ae13d05b1abb477b63055be82120 | 2   | 0.574036511156187 | FALSE |
| c24ecd06ba3dbda7902bf9911bf372b9 | 2   | 0.574036511156187 | FALSE |
| 19981ee4c04815f6a74c0c28278b4dac | 2   | 0.574036511156187 | FALSE |
| 6bf39213fe84abc512eabc37315923b  | 2   | 0.574036511156187 | FALSE |
| 473bc5c589d3abf37972dd9c7cde20bb | 2   | 0.574036511156187 | FALSE |
| 34216a28c46c028e1026aae8d27271d6 | 2   | 0.574036511156187 | FALSE |
| 6f0deb7981650ae3e9ee2c309a4565e4 | 2   | 0.574036511156187 | FALSE |
| 963582325831c0cd60c85bb2a828935f | 2   | 0.574036511156187 | FALSE |
| dd14a2ab8cafb7651bdb1cce5773535  | 2   | 0.574036511156187 | FALSE |
| 22d32c27c94d47482fd25cb0e8c65e38 | 2   | 0.574036511156187 | FALSE |
| acc70fa94c2ae515818445e37268f59f | 2   | 0.574036511156187 | FALSE |
| 35d552e9aa4e7126cc2489e0b0aabd0b | 2   | 0.574036511156187 | FALSE |
| 495174360f9b450d25be0fcd035630b  | 2   | 0.574036511156187 | FALSE |
| 1a528eea8d2f33474bd7f647cc1ba694 | 2   | 0.574036511156187 | FALSE |
| 5c6ac5a27dd6c66c995e76f28ff3fea4 | 2   | 0.574036511156187 | FALSE |
| 9dabf344a87b6c26d226351cc10a2a5d | 2   | 0.574036511156187 | FALSE |

|                                   |    |                   |       |
|-----------------------------------|----|-------------------|-------|
| f59eb777bfe41f27f84f114609d558ce  | 2  | 0.574036511156187 | FALSE |
| 44cbe35f49cc2825a1cab0c45875238b  | 2  | 0.574036511156187 | FALSE |
| 66781e54d7c70751dd4315324ee6a730  | 2  | 0.574036511156187 | FALSE |
| 5bdaad19f2a370833f353f14c372764e  | 2  | 0.574036511156187 | FALSE |
| eef731495f535ba4c0e34f7b6827b01d  | 2  | 0.574036511156187 | FALSE |
| 65a1f76dd20322568fa79a52f095c4d3  | 2  | 0.574036511156187 | FALSE |
| 7f0e8f6049e044128bb02c2904584fe9  | 2  | 0.574036511156187 | FALSE |
| addb5446f7a31c8057158bfb2e88a25   | 2  | 0.574036511156187 | FALSE |
| c8f0d849875f193a6dfb78c29f293fac  | 2  | 0.574036511156187 | FALSE |
| d1a66fbb0ffb55d8ca5bde15afd2cbfd  | 2  | 0.574036511156187 | FALSE |
| b75f8c1ee5be34e1e86f0794da0994a6  | 2  | 0.574036511156187 | FALSE |
| d60b57fe3931d10aff6007227c714b94  | 2  | 0.574036511156187 | FALSE |
| b524bdb0093f4363f6dccc957c3bc0cab | 2  | 0.574036511156187 | FALSE |
| 4a32f1635f88214c4874eec85df56595  | 2  | 0.574036511156187 | FALSE |
| 1bc6c19320b6c5d08d6af72f39ca7028  | 2  | 0.574036511156187 | FALSE |
| 12c7139b414de8443898fa448413c98e  | 2  | 0.574036511156187 | FALSE |
| 59555b720479b4dae97998e8573280ce  | 2  | 0.574036511156187 | FALSE |
| 3f3a185ee907d56d95b84ccb84399854  | 2  | 0.574036511156187 | FALSE |
| 8c311c27f6e8803ed957220d8645a52   | 2  | 0.574036511156187 | FALSE |
| d8b253da31cae9272be8c76108df2c79  | 2  | 0.574036511156187 | FALSE |
| 11f72383f466cfd3d9c00fb0ddfa187   | 2  | 0.574036511156187 | FALSE |
| 6bf6bc06c4696e95747f2584057622c3  | 2  | 0.574036511156187 | FALSE |
| 5f0af45dcc3031ff73fa133f78f01dff  | 2  | 0.574036511156187 | FALSE |
| d7059e9440d7d26e2e445d56303678d2  | 2  | 0.574036511156187 | FALSE |
| 59b13e3e404561803ca77c7fe3d03a0a  | 45 | 0.579476602130643 | FALSE |
| 69e611251f4d8582e312afa5737f033e  | 46 | 0.596027827052081 | FALSE |
| d4bb3a2a7d6486a2201bb8770fb0a6d   | 3  | 0.606936130213229 | FALSE |
| f5a382df02639db40c978149c852f631  | 3  | 0.606936130213229 | FALSE |
| 3c862616eb99d4336427f8c121410e30  | 3  | 0.606936130213229 | FALSE |
| 327af6c728df4ea81eb33ebb1c7b1f9c  | 3  | 0.606936130213229 | FALSE |
| a256dcba109fe74b499e46900f7297bd  | 3  | 0.606936130213229 | FALSE |
| 8dc44508eb6a496df987c76cf6a23e10  | 3  | 0.606936130213229 | FALSE |
| 4ae0b8cee8d20168e08cb4f11ab7aeea  | 3  | 0.606936130213229 | FALSE |
| 0d3677300a537a199d53c388dd4f9d14  | 3  | 0.606936130213229 | FALSE |
| efea489e9aeea8ea8714c557cca5599d  | 3  | 0.606936130213229 | FALSE |
| 0cdc9b91d67a45a312f99f2e1a3b1462  | 3  | 0.606936130213229 | FALSE |
| 25817204502b01664ae7e0b787a23d35  | 3  | 0.606936130213229 | FALSE |
| 3d95c89ac99d998a8702babf9a83b566  | 3  | 0.606936130213229 | FALSE |
| b6d5dae42d6441946b72536202970b6f  | 3  | 0.606936130213229 | FALSE |
| 78643cfd45f5d0e81fab3682a85bbe11  | 3  | 0.606936130213229 | FALSE |
| 6d51a149e8639a5edc3818184b07ef43  | 3  | 0.606936130213229 | FALSE |
| cee08a446ff68f17526d7e203bbe871e  | 3  | 0.606936130213229 | FALSE |
| e2dc6ea9ee0035962b6ecdcb882c648f  | 3  | 0.606936130213229 | FALSE |
| ee496894344fde402c4a74ee69ad20fe  | 3  | 0.606936130213229 | FALSE |
| ae31c634072e81af29cf4f857b5cee8a  | 3  | 0.606936130213229 | FALSE |
| 4675c263dc11b27a89c8b1a740a2b528  | 3  | 0.606936130213229 | FALSE |
| 445dc3e0e095d35c29018c23a15e9aed  | 3  | 0.606936130213229 | FALSE |
| 2605f4046444e0b60c1bbc901c97f065  | 3  | 0.606936130213229 | FALSE |
| 788883e3b7ee47924346c610b2ab6014  | 3  | 0.606936130213229 | FALSE |
| 85b4d7d480ef06ef2844b93115d87480  | 3  | 0.606936130213229 | FALSE |
| 8a0c8e17b96eaf823d7fc5b6ba2fa1a2  | 3  | 0.606936130213229 | FALSE |
| 3d1f0db0a5df73cc2642739c4ee2b98c  | 3  | 0.606936130213229 | FALSE |
| 3b80c7cd38deabc389b31026c8195e2a  | 3  | 0.606936130213229 | FALSE |
| 03f2666d9f52d8fccc13d113af7f470   | 3  | 0.606936130213229 | FALSE |
| 90eaaad185a24ca78f31616c482b66874 | 3  | 0.606936130213229 | FALSE |
| 41997260ae3f1fa6e7c669acf6fa32f2  | 3  | 0.606936130213229 | FALSE |
| 8a5c6d9fa02edda06539c4df83899ca   | 3  | 0.606936130213229 | FALSE |
| daefb5b04252122ce0f8c0b63169df36  | 3  | 0.606936130213229 | FALSE |
| 7c57923c256db3ea4aa63f12e5afcc9f  | 3  | 0.606936130213229 | FALSE |
| 438dc2a2ea2405a782df5830ae62100e  | 3  | 0.606936130213229 | FALSE |
| 77dd072d2525de28b3d827121cdf463a  | 3  | 0.606936130213229 | FALSE |
| e5816f291546ca05fda640ec24b5c7e3  | 3  | 0.606936130213229 | FALSE |
| 652b78d7b987b1efc1917822209ba690  | 3  | 0.606936130213229 | FALSE |
| a99f6029c214a53baa6613443940b67a  | 3  | 0.606936130213229 | FALSE |
| 519d34f37ef0123b10f482f21b11bf54  | 3  | 0.606936130213229 | FALSE |
| ade61be54713fafdfc05977a921ec339  | 3  | 0.606936130213229 | FALSE |
| 2fd73e273a5ab911a9bab5ccc85e8178  | 3  | 0.606936130213229 | FALSE |
| 72ee964de9b0144e80347bd4e7112cf9  | 3  | 0.606936130213229 | FALSE |
| 1eeb8eeacd8184a41db687812348d06c  | 3  | 0.606936130213229 | FALSE |
| a6fd733e44ef6fa8048ef0094de67f28  | 3  | 0.606936130213229 | FALSE |
| cceb354db8986b34d8c5b435adfc4324  | 3  | 0.606936130213229 | FALSE |
| 9cab98d9be1a58a0486d67ec723285f0  | 3  | 0.606936130213229 | FALSE |
| ca5e711152517b591d9d48b783f4942b  | 3  | 0.606936130213229 | FALSE |
| ded5b76b4b3e821ef40d5df3fb48c91a  | 3  | 0.606936130213229 | FALSE |
| 65ff839c902a244022b20e77f4aed679  | 3  | 0.606936130213229 | FALSE |
| 3e5b4c5f9ec53fa58f406bb4872c2400  | 3  | 0.606936130213229 | FALSE |
| 579c3508fb7953140df95b7964b55fa0  | 3  | 0.606936130213229 | FALSE |
| 1289b5c9697f9da8b8f9648e728bc50   | 3  | 0.606936130213229 | FALSE |
| 0a9a722df3a13268be23ddee2cc2a0f6  | 3  | 0.606936130213229 | FALSE |
| 209ba71d1bcc4949b4d1fabd2ab15daa  | 3  | 0.606936130213229 | FALSE |
| e474c7483a3a1001e73c7aeadf5b8ee0  | 3  | 0.606936130213229 | FALSE |
| 929d9a7f88bd83bc06d889c356d9a13e  | 3  | 0.606936130213229 | FALSE |

|                                  |     |                     |       |
|----------------------------------|-----|---------------------|-------|
| 47f13b66aafef2c4c7f9684ab7275d   | 3   | 0.606936130213229   | FALSE |
| fb5bc4108d4ca6924d7bad409faff095 | 3   | 0.606936130213229   | FALSE |
| 94d028d1bd01f40929f957b02afb576  | 3   | 0.606936130213229   | FALSE |
| f889135f2c43218e4ddd55532ff76c3c | 3   | 0.606936130213229   | FALSE |
| 85539c5100ea1d50723a53eb3099d883 | 3   | 0.606936130213229   | FALSE |
| 89b63341871a7ebd775e6f7064b1707d | 3   | 0.606936130213229   | FALSE |
| c1951d3e81e7f747aa634297072ea77d | 3   | 0.606936130213229   | FALSE |
| d71af0f02e2ca087c76c0a2b710c0945 | 3   | 0.606936130213229   | FALSE |
| 43152d438ac75bad2ec2ec1457f6cac7 | 3   | 0.606936130213229   | FALSE |
| 0959782df74fea06fad1164f978fdd0e | 3   | 0.606936130213229   | FALSE |
| a3e2eb7398560e8e86867617d8011442 | 3   | 0.606936130213229   | FALSE |
| a8195c108dec446f5c967078c25ebb74 | 3   | 0.606936130213229   | FALSE |
| f79e9a78ab07909675c88e20cb0d95f5 | 3   | 0.606936130213229   | FALSE |
| d92fcfcf215ad9fb193679b04a6737c0 | 3   | 0.606936130213229   | FALSE |
| 3136568cc32e1c6e2d0f114157863862 | 3   | 0.606936130213229   | FALSE |
| 7f68fd259107cfa9ac346ed09c5ef371 | 3   | 0.606936130213229   | FALSE |
| 13cdf5b7da440810afb5d555701d91b  | 3   | 0.606936130213229   | FALSE |
| 3272f6b65b719378bb264a3740b2b40b | 3   | 0.606936130213229   | FALSE |
| ffb4b3994b2616a402100d1577ce4399 | 3   | 0.606936130213229   | FALSE |
| 55a225ab357fc87843d85d47fb8f2282 | 3   | 0.606936130213229   | FALSE |
| c67d690916dc301d204b7cbb2bcc2ef8 | 3   | 0.606936130213229   | FALSE |
| c1ae341aa77f14e7a1e3e62e413527da | 3   | 0.606936130213229   | FALSE |
| f39c1375b0565eda3b6660be85427c29 | 3   | 0.606936130213229   | FALSE |
| 7b6814cac868c1b645d0d8265e0fdd1c | 3   | 0.606936130213229   | FALSE |
| c6890b2e0e1c9ef31f93bf534d80700  | 3   | 0.606936130213229   | FALSE |
| fe8d7e83f839d336881ec8419bb51293 | 3   | 0.606936130213229   | FALSE |
| e0c17f6dde47055ed0caa4a7745e30c9 | 3   | 0.606936130213229   | FALSE |
| 02e0ce559228307ed79cde3fe7b80ab  | 3   | 0.606936130213229   | FALSE |
| 151b90216c2f9ee35e184dafd9021130 | 3   | 0.606936130213229   | FALSE |
| 6babf4c5597da7990b82913ea7ac3ba2 | 3   | 0.606936130213229   | FALSE |
| 85a6f256aa6e1022a8e6bc648f01c037 | 3   | 0.606936130213229   | FALSE |
| 362d9d88f3195db02bbb580a020b0836 | 3   | 0.606936130213229   | FALSE |
| b48900c23466c96cfaf4e4703c038566 | 3   | 0.606936130213229   | FALSE |
| 91090378e3a2b9e5e491fb0a627fb4c8 | 3   | 0.606936130213229   | FALSE |
| 72bb4b354b241a0bd9abd7caec6e9bae | 3   | 0.606936130213229   | FALSE |
| e548b781611a16362f9dbaf34be313   | 3   | 0.606936130213229   | FALSE |
| eee80ff9268cc2e906d5b61786b66fbc | 3   | 0.606936130213229   | FALSE |
| b7dc1eedb15b4565b44c28c5fbbe49f5 | 3   | 0.606936130213229   | FALSE |
| 4e454938d9d1ae77d79ae8bf299a983f | 3   | 0.606936130213229   | FALSE |
| c56ac869661ff7a8d192fede12c318b2 | 3   | 0.606936130213229   | FALSE |
| a4911447e5266f8a7d9bcef199267664 | 3   | 0.606936130213229   | FALSE |
| 1cf5017ed722b6a562933b84a77eeaf  | 3   | 0.606936130213229   | FALSE |
| 67496c58a44c58d60e084c6ae9f5ead7 | 3   | 0.606936130213229   | FALSE |
| 252e8532fee4f48af5e39f7514eb9d0b | 3   | 0.606936130213229   | FALSE |
| 749b5b5cdf99a6ba907ad7e654702c7c | 3   | 0.606936130213229   | FALSE |
| b20f67d057bf23d44987c07876722fbf | 3   | 0.606936130213229   | FALSE |
| 29a2ae2201cb196a28835102b6fad6f5 | 3   | 0.606936130213229   | FALSE |
| 5e94d08d6cbbc3f5ab8d171568aa7196 | 3   | 0.606936130213229   | FALSE |
| 942bfb95d8f5f87f5a4340c64becbad0 | 3   | 0.606936130213229   | FALSE |
| 80565df1fb13bea7c5ffe8520f5add51 | 3   | 0.606936130213229   | FALSE |
| 9f7cd43f82859743a9fb6294b413138a | 3   | 0.606936130213229   | FALSE |
| 6faaa11948882a569d8900983904d12e | 3   | 0.606936130213229   | FALSE |
| a4416bcf0ce3d2e25b3db4e987f4d88f | 3   | 0.606936130213229   | FALSE |
| 7a1fbb0c1134ad5443dd743ea4b6f3ac | 3   | 0.606936130213229   | FALSE |
| 5719b9b59cc1ec3e172cc9b9f3f0730f | 47  | 0.61220443686347023 | FALSE |
| e59eb4f8c8550ddeb4ba43baf144ae11 | 19  | 0.612983675440831   | FALSE |
| d56403223c8765b24812c19f1f844349 | 19  | 0.612983675440831   | FALSE |
| 6d3e98290cbcd32480eb921f276470a5 | 19  | 0.612983675440831   | FALSE |
| 860c2d10b074762187a1f3235f22558  | 19  | 0.612983675440831   | FALSE |
| 38bfd3a2cf83da8fe03cea0f6b4f5f3  | 19  | 0.612983675440831   | FALSE |
| 760eb607a6f9eabf73fc3bc008113f73 | 19  | 0.612983675440831   | FALSE |
| 92ac8b57e0db3e849b7c8b0df7802639 | 19  | 0.612983675440831   | FALSE |
| da1f560e36ff523b6eae1acb26e7799  | 20  | 0.635090590400632   | FALSE |
| 49dc837f8fb48a7b37318967391f96d8 | 20  | 0.635090590400632   | FALSE |
| 834d07b2a02c48a75e52cd3d63f7315  | 162 | 0.635262861075058   | FALSE |
| 9178843fe6c1b2b119e81a324c06e5ed | 4   | 0.637356551907521   | FALSE |
| 79065bc5c081ea35aac41a59226dfaff | 4   | 0.637356551907521   | FALSE |
| 857690bde71e50e3f9d91d2b77c8e675 | 4   | 0.637356551907521   | FALSE |
| 144e1bdc5d10e64c663d3833d416183b | 4   | 0.637356551907521   | FALSE |
| e40124c65379aab7ddc74c3d1c35213f | 4   | 0.637356551907521   | FALSE |
| 6829b5946a95b929e9904067d572db6f | 4   | 0.637356551907521   | FALSE |
| 7fd8ac343154ef6966a03f376782be92 | 4   | 0.637356551907521   | FALSE |
| 8419a2a1403b971c044d92d057e01ecb | 4   | 0.637356551907521   | FALSE |
| 4313fef965a323b897e452786b227480 | 4   | 0.637356551907521   | FALSE |
| 4e7b984fa0360b99fee1ceb10a122d3  | 4   | 0.637356551907521   | FALSE |
| 258f50eaf72af21d70c648397c668b6  | 4   | 0.637356551907521   | FALSE |
| 36b69044091011464daa0325da37f61a | 4   | 0.637356551907521   | FALSE |
| dc5030eb18fe395a50b8235f2e583dbd | 4   | 0.637356551907521   | FALSE |
| 4b95050efbe5bb490a63b0410c951326 | 4   | 0.637356551907521   | FALSE |
| 25e956ad84aba7ccf51f84544fe3b8d6 | 4   | 0.637356551907521   | FALSE |
| 3837a63a524a7a187121536fff409284 | 4   | 0.637356551907521   | FALSE |
| 1cd63754d2a45e4da3e2c17c07c39931 | 4   | 0.637356551907521   | FALSE |

|                                  |   |                   |       |
|----------------------------------|---|-------------------|-------|
| 105e6198e75d958ec2bee64369687e8  | 4 | 0.637356551907521 | FALSE |
| 42b8c9335747b0c86fc68d8adfc8315  | 4 | 0.637356551907521 | FALSE |
| 9654b46bd802f2c2748ecc5e77d9f721 | 4 | 0.637356551907521 | FALSE |
| b7c98a016051abbbc602fa6163280ef8 | 4 | 0.637356551907521 | FALSE |
| 8c40ae61863ad1094a5fe3e7a1e56ee4 | 4 | 0.637356551907521 | FALSE |
| e5fbcec9c3476c84ce40270b6f0bf4ed | 4 | 0.637356551907521 | FALSE |
| 3cf8e3f2936c2215ad012e031a11dfc8 | 4 | 0.637356551907521 | FALSE |
| 5cc66b33870d22cf990e6a8ca618bb2a | 4 | 0.637356551907521 | FALSE |
| cad4e11393fe489023ae6a9724d6894d | 4 | 0.637356551907521 | FALSE |
| 77f21f2da2d7b5fd7e7730b964e1ca40 | 4 | 0.637356551907521 | FALSE |
| a509a05ddfc4a6df40cd9b1e75cb5f84 | 4 | 0.637356551907521 | FALSE |
| 618799965cb9fcfae385cc63346f300f | 4 | 0.637356551907521 | FALSE |
| bfd1c34f739028e507f085cdb991a0a2 | 4 | 0.637356551907521 | FALSE |
| 8d790eff268748c8792ab4fd07100e8a | 4 | 0.637356551907521 | FALSE |
| 418d67cfd71b0f894bd6752f91a55124 | 4 | 0.637356551907521 | FALSE |
| 3f33b7ba47ff472f3dfa37699b3d4945 | 4 | 0.637356551907521 | FALSE |
| fc1b76278975ee14760e108221ce14f0 | 4 | 0.637356551907521 | FALSE |
| e56bd9b14d748dde0d00fbca0c059b3  | 4 | 0.637356551907521 | FALSE |
| ee5c297bd9fff3db3dca564f4de2b083 | 4 | 0.637356551907521 | FALSE |
| 392be618576de3abfe491746b24b64fc | 4 | 0.637356551907521 | FALSE |
| 402e5913597695a16d7cad415ffff02f | 4 | 0.637356551907521 | FALSE |
| bfedbe08a11c47b4f1fba543a22b5d75 | 4 | 0.637356551907521 | FALSE |
| 0a9507c499d16037a527e88e32e7555a | 4 | 0.637356551907521 | FALSE |
| 89623e037318e0f10a2b26123022dc25 | 4 | 0.637356551907521 | FALSE |
| 7f0a3c1eb166fa8b6b8c6169d5d2ee21 | 4 | 0.637356551907521 | FALSE |
| 5228eae5a2de5ec5faecaf127b4488b  | 4 | 0.637356551907521 | FALSE |
| 2f1a6634dba0fc6e04a10a0ab23bee9  | 4 | 0.637356551907521 | FALSE |
| ccc5b420e1a3e5b891e8a467366084ee | 4 | 0.637356551907521 | FALSE |
| 459a2ee9b40cae14ff8b1154046a45bf | 4 | 0.637356551907521 | FALSE |
| 5ac0ca1b313546c59510815ec598f6d4 | 4 | 0.637356551907521 | FALSE |
| 9a1299533fdc202ea9dd1f8145e15c45 | 4 | 0.637356551907521 | FALSE |
| 1320e90134d8dd811304a9236e035b4  | 4 | 0.637356551907521 | FALSE |
| 7b25dfc72ef88a31085ef11f520cbc9e | 4 | 0.637356551907521 | FALSE |
| d6f114c9b544a83d9650ee4091d3c8e6 | 4 | 0.637356551907521 | FALSE |
| 6dcfd39fe967d9a976c330487e0ad0f0 | 4 | 0.637356551907521 | FALSE |
| 3cd349d8dfdf16a5902fb77218065d47 | 4 | 0.637356551907521 | FALSE |
| 98976c388182f72eaf6444f252df2c4b | 4 | 0.637356551907521 | FALSE |
| f83d060cd08f3a5c14531d80cb10d90  | 4 | 0.637356551907521 | FALSE |
| 7bb75a908f84cea53943cd1359b1deda | 4 | 0.637356551907521 | FALSE |
| 1d4755131d0455f2ec5886e574308f11 | 4 | 0.637356551907521 | FALSE |
| aba879ff52d1205f49a5c7c257679f61 | 4 | 0.637356551907521 | FALSE |
| 32e4f11674dad6bcd7909e3a195f33c  | 4 | 0.637356551907521 | FALSE |
| f34bde4e8b265f13ee0a2e4b2e72532b | 4 | 0.637356551907521 | FALSE |
| 39a7609929b77123cfe01080cd3a8ac8 | 4 | 0.637356551907521 | FALSE |
| c6ff7bf11a21be39a971d86ac35ff02  | 4 | 0.637356551907521 | FALSE |
| 768d8ea38ea385a980b2218b8ccc6966 | 4 | 0.637356551907521 | FALSE |
| 391d3538ad8650017b13fe98bde557a8 | 4 | 0.637356551907521 | FALSE |
| 2178c86013f371f34ca8b6d82283dae9 | 4 | 0.637356551907521 | FALSE |
| 2bd44a9b4d580c5af16e7858b5554f05 | 4 | 0.637356551907521 | FALSE |
| ece5f619b7415de3b8df0c94e1e708b0 | 4 | 0.637356551907521 | FALSE |
| 1b4572cc774d5173d5e09c03dbbca0eb | 4 | 0.637356551907521 | FALSE |
| 88ab02c4a5b3b7fde63cdc6a21bdb6a5 | 4 | 0.637356551907521 | FALSE |
| 941e623512e7f598fc9942eaae0a6e70 | 4 | 0.637356551907521 | FALSE |
| 044e0092f4724300a52cce5c5fd4e882 | 4 | 0.637356551907521 | FALSE |
| 31921717848a5efcb875586d869f53f9 | 4 | 0.637356551907521 | FALSE |
| 71decf7564882efd1d2190fd29460d40 | 4 | 0.637356551907521 | FALSE |
| 16bab126b1836db96e5b5f9d59bc8a7  | 4 | 0.637356551907521 | FALSE |
| 31f7982d2607c5b3685d6c3974f2ed79 | 4 | 0.637356551907521 | FALSE |
| 8d4c51764c41d581fadd36ab1a7db29d | 4 | 0.637356551907521 | FALSE |
| 30077f5042a2a53449f3aff0a7f21b7  | 4 | 0.637356551907521 | FALSE |
| 7cc6f23189123997fb56b704764660d8 | 4 | 0.637356551907521 | FALSE |
| 420001a74ca908712b4924c90f2fa112 | 4 | 0.637356551907521 | FALSE |
| 15a9309869945ab937c92fbc690903ef | 4 | 0.637356551907521 | FALSE |
| e503811c021343f5b11cae8d1d435f07 | 4 | 0.637356551907521 | FALSE |
| 4ce4bc11c99a28b0fe57853364b8451e | 4 | 0.637356551907521 | FALSE |
| adc1e763a2e0ce37c9340ff2e25940d  | 4 | 0.637356551907521 | FALSE |
| 888f1e27e68f8c06512e9bfb356a16e  | 4 | 0.637356551907521 | FALSE |
| b0d17476ed8f57285dc3fd68d30d84c  | 4 | 0.637356551907521 | FALSE |
| 65e5847f2fe022a965dc8d4fca56434f | 4 | 0.637356551907521 | FALSE |
| 06e10170152a7df3a946a557400c4bd7 | 4 | 0.637356551907521 | FALSE |
| 5e3736d7500f1847fde308557ffbcfdd | 4 | 0.637356551907521 | FALSE |
| fb3ace8db3915ddb8eecd36a05742f1  | 4 | 0.637356551907521 | FALSE |
| 63a00abba59283d87fa649e4b991da6e | 4 | 0.637356551907521 | FALSE |
| 0a11bdf36506b66e44139ff447e2dead | 4 | 0.637356551907521 | FALSE |
| 6c75cfbcda95ba7be4b96bd18203552b | 4 | 0.637356551907521 | FALSE |
| e0196d786487dae63ea300ec2eac2dad | 4 | 0.637356551907521 | FALSE |
| 0ff344210a06866101d371ddca1193af | 4 | 0.637356551907521 | FALSE |
| 41c984e77f65b6f4e3a141b213bb652e | 4 | 0.637356551907521 | FALSE |
| d51c2d5527534ea09b7c9279d8df7bb3 | 4 | 0.637356551907521 | FALSE |
| 8f62e1ce476fc35015f544e35bf6b791 | 4 | 0.637356551907521 | FALSE |
| a10540eb078d6525325f1e1fa607387  | 4 | 0.637356551907521 | FALSE |
| a02a6468b6682c4ab0f0b31b8e080a30 | 4 | 0.637356551907521 | FALSE |

|                                   |     |                   |       |
|-----------------------------------|-----|-------------------|-------|
| 341d0af40ca4d417d5d4b795ecb0cf34  | 4   | 0.637356551907521 | FALSE |
| 64301da69a74b94ac07fc109172f2c1a  | 4   | 0.637356551907521 | FALSE |
| 264e7ee6f0bf9bd1888f5b1bc40e18c9  | 4   | 0.637356551907521 | FALSE |
| 3e30a1f52cc81e130b8c023988acf9d5  | 4   | 0.637356551907521 | FALSE |
| 0ea6c0d1c3fc13d6a4d01653e44f19e4  | 4   | 0.637356551907521 | FALSE |
| cf4b69428c4fbc0a55b81d9cfcf7604d  | 4   | 0.637356551907521 | FALSE |
| 3d06d03c32c7b6782a377199e96f576e  | 4   | 0.637356551907521 | FALSE |
| a35640f17ff92ea37bea4104d9bb7f1e  | 4   | 0.637356551907521 | FALSE |
| 9fdb12014b64c13ab70cac6a6b2b02ef  | 4   | 0.637356551907521 | FALSE |
| 803a31819695ae771de888afe8af7e71  | 4   | 0.637356551907521 | FALSE |
| 290d9dfd81df5f7192e22b2b347f4120  | 4   | 0.637356551907521 | FALSE |
| 1734c3e181110615bde5b21025d3976   | 4   | 0.637356551907521 | FALSE |
| 91f9cd9795f7b8793d9e06af80b0d056d | 4   | 0.637356551907521 | FALSE |
| 0af9cf4f3e0a17840c19fda47ff11769  | 4   | 0.637356551907521 | FALSE |
| 202df81eb46cfff330eeeee7e00092e   | 4   | 0.637356551907521 | FALSE |
| ab61dbbc92d649f771918bab6ab7bbd1  | 4   | 0.637356551907521 | FALSE |
| 1056f4b6efc9797605ca25674fac9912  | 4   | 0.637356551907521 | FALSE |
| 45c63731d8dbb3b9e663139022627d43  | 4   | 0.637356551907521 | FALSE |
| c1b4edf475fac73cbb145b05d22e6e3a  | 4   | 0.637356551907521 | FALSE |
| b1d39025553d5a2e77eed0fd245eee5d  | 4   | 0.637356551907521 | FALSE |
| 0c3ca4bdbcc55a1eaf440eb73dd01a8a  | 4   | 0.637356551907521 | FALSE |
| 0a0f6a64b9bca840e46c7285b457c36b  | 4   | 0.637356551907521 | FALSE |
| 7cbbafaca7a9bbb37376880e4a0f14e   | 4   | 0.637356551907521 | FALSE |
| 87118b7c468f54f714cd3a4701f728a4  | 4   | 0.637356551907521 | FALSE |
| c6aae8ae72923155732f2e48a26b2fb9  | 4   | 0.637356551907521 | FALSE |
| 6359fb9ad7c1e779f94c583a2ec6fce5  | 4   | 0.637356551907521 | FALSE |
| 3bab94bbc9e095798d906d0afdc6d67f  | 4   | 0.637356551907521 | FALSE |
| 3752c0937de8a03bbbf765819c78099   | 4   | 0.637356551907521 | FALSE |
| c967baaf09da450bd29583233ea1a781  | 4   | 0.637356551907521 | FALSE |
| c0c03235e8911295a37e19ba1c0af1a3  | 4   | 0.637356551907521 | FALSE |
| b73ff1487c71f12a47318e8e9df59f04  | 4   | 0.637356551907521 | FALSE |
| 90422dff863388c4c097236cdf729f4   | 4   | 0.637356551907521 | FALSE |
| dbf3b32e6fcd7f6db830760df87aa435  | 4   | 0.637356551907521 | FALSE |
| f2cc6eac9ecbcfa96ebd1c178e4ec6a2  | 4   | 0.637356551907521 | FALSE |
| 052bea98ea58d64bc7e0d792d4bb43c8  | 4   | 0.637356551907521 | FALSE |
| b4e05e11ee1b2518be2326d19721217   | 4   | 0.637356551907521 | FALSE |
| 7dbb203fe0dfef7a33364e079154fc20  | 4   | 0.637356551907521 | FALSE |
| d39d3f4f4d4881c0b75864dbe733de6d  | 4   | 0.637356551907521 | FALSE |
| 00f2f103259e0d2d279bec1899a683d5  | 4   | 0.637356551907521 | FALSE |
| fc1c8932bfec8f0f632c63b5095b577   | 4   | 0.637356551907521 | FALSE |
| 22872cce3904e3a7a73c15e4e63fcc2a  | 4   | 0.637356551907521 | FALSE |
| de260172685c660a90923d290b078fd3  | 4   | 0.637356551907521 | FALSE |
| 38316233d8ebd5de6fdb0b87bdf0c285  | 4   | 0.637356551907521 | FALSE |
| d482a8fc557bc969959b0c2a704c2c16  | 4   | 0.637356551907521 | FALSE |
| 79813aad3f28c52fd69a1e1e7f5892f   | 4   | 0.637356551907521 | FALSE |
| ef628a53847821349bbe7988bcfb924   | 4   | 0.637356551907521 | FALSE |
| 85cfaa63370df8961eebc7b05ba076fb  | 4   | 0.637356551907521 | FALSE |
| 96416a69b1811ba8778fa127f20a3b15  | 4   | 0.637356551907521 | FALSE |
| 8efc96acc5fc0d9b6bda279be150150b  | 4   | 0.637356551907521 | FALSE |
| e4ab5016c0eac0e4fbb1c8ea75b0ca28  | 4   | 0.637356551907521 | FALSE |
| 2aab0c408ab7e997e07d713b70cc5824  | 4   | 0.637356551907521 | FALSE |
| 6854a1092add43549b415370c0bd2d0f  | 4   | 0.637356551907521 | FALSE |
| d31fb970ff9b6217462a4e0e52ca4b5e  | 4   | 0.637356551907521 | FALSE |
| a88c5da1937f04d0c44ef7243e9476cb  | 4   | 0.637356551907521 | FALSE |
| 8cf45fe9e1251163b5d801841857a873  | 4   | 0.637356551907521 | FALSE |
| a3699e0b9b431b8f11e1065820deae6b  | 4   | 0.637356551907521 | FALSE |
| 901e24ec7d14fc177f9c15ab0f972d    | 4   | 0.637356551907521 | FALSE |
| 9a11856898d64d590fca69779018c7d   | 4   | 0.637356551907521 | FALSE |
| 46e6034076b1f5aa371734d5c41605c8  | 4   | 0.637356551907521 | FALSE |
| 9232ae2e99a9314f625e80cc5f7a1b77  | 4   | 0.637356551907521 | FALSE |
| 15d8de3365192fca85622a7366050ee6  | 4   | 0.637356551907521 | FALSE |
| 8081227a3285bf886a9aeb207a890c38  | 4   | 0.637356551907521 | FALSE |
| 0cf93a42d2f697d21739461b118851b   | 4   | 0.637356551907521 | FALSE |
| 3baabf8cc3e85c0f8b1d2790db20f838  | 229 | 0.647158144172996 | FALSE |
| 77d6a7db6de3bb1f15a02fdb36f90627  | 69  | 0.652990903333722 | FALSE |
| eac36cc96b0e7277d4a485dbe6199beb  | 21  | 0.656163025642436 | FALSE |
| d31af52f792634b80a89d3d310e619b4  | 21  | 0.656163025642436 | FALSE |
| 8f8539ce9266ce2c572b682f190cc810  | 50  | 0.658378182086215 | FALSE |
| 26c9f4f844da09bdd5c1603be193969c  | 36  | 0.662109791353658 | FALSE |
| a1a3200b76bcd6000a0914892d370b6e  | 5   | 0.665479921351427 | FALSE |
| 442cc2db14651564914488bfdffd5071  | 5   | 0.665479921351427 | FALSE |
| 4c91e1ea3c1279e207a971df915d6178  | 5   | 0.665479921351427 | FALSE |
| d6819c57d6aac8113578b04b0911dc2   | 5   | 0.665479921351427 | FALSE |
| 79639ce66720319d718c17711fae3704  | 5   | 0.665479921351427 | FALSE |
| 8bfe73e7d3c17f599aec113950d751de  | 5   | 0.665479921351427 | FALSE |
| 501c1cf67a877c81057dd3fb330ddc18  | 5   | 0.665479921351427 | FALSE |
| a412a5462ab0b34fa3b0b6dcdfa66b7f  | 5   | 0.665479921351427 | FALSE |
| 5ba826b6728c5f7a97293ac6c310a446  | 5   | 0.665479921351427 | FALSE |
| e5ca098c7ee4d0fc9ff60e16e577c2b0  | 5   | 0.665479921351427 | FALSE |
| 03efc0161abb4e11e93f1870e9d5df40  | 5   | 0.665479921351427 | FALSE |
| 4b2862d8ddf6848328ccc64dbc6af0c2  | 5   | 0.665479921351427 | FALSE |
| 985e584faf3be7a41d1bca9d8e598817  | 5   | 0.665479921351427 | FALSE |

|                                   |   |                   |       |
|-----------------------------------|---|-------------------|-------|
| 56d75f22814ed2e9bb37c1452b26bc10  | 5 | 0.665479921351427 | FALSE |
| 37ec4bfd1c6ad9de0c6feef00d98d8a1  | 5 | 0.665479921351427 | FALSE |
| 800f4b5ec4543c7757ff29f6d5941d39  | 5 | 0.665479921351427 | FALSE |
| ed40b08eedec4f873d38551aa43b0fde  | 5 | 0.665479921351427 | FALSE |
| 1dbd3332661515bcd3ae32a9b9e43d1   | 5 | 0.665479921351427 | FALSE |
| 621f0a4f8c2414b17f3b40434862a251  | 5 | 0.665479921351427 | FALSE |
| c504e0ca94534572016a31761f44776b  | 5 | 0.665479921351427 | FALSE |
| 9b1a22ceee6ecfbd684d46412f9dc49   | 5 | 0.665479921351427 | FALSE |
| 3bd445c971cbfba4df12c07a68dec7    | 5 | 0.665479921351427 | FALSE |
| 72cef79e08aeb54df80915bab3ee3c01  | 5 | 0.665479921351427 | FALSE |
| 694ee281b908e4bfcbe8d88584224367  | 5 | 0.665479921351427 | FALSE |
| 805599865882c8802a1ebbc3d539b68a  | 5 | 0.665479921351427 | FALSE |
| bc4de31fa467e0b792b58e230e7cee7a  | 5 | 0.665479921351427 | FALSE |
| 51716d6182efdb29a158fe9562c83312  | 5 | 0.665479921351427 | FALSE |
| 71ad47c3b8cca9e31443d2370f72b32f  | 5 | 0.665479921351427 | FALSE |
| d60a0925b76d5201afe16641d9cc1992  | 5 | 0.665479921351427 | FALSE |
| 2f267743f640a6790a563ddfbd2bf647  | 5 | 0.665479921351427 | FALSE |
| d5c502312559578912b7c07f862f08a7  | 5 | 0.665479921351427 | FALSE |
| d473f30bb25b09ce020fab5b7f4ce14a  | 5 | 0.665479921351427 | FALSE |
| a05f9f73ca792d7702b8dc6521d169b6  | 5 | 0.665479921351427 | FALSE |
| 99ffc98aa2402b754b593ee3769ceb1   | 5 | 0.665479921351427 | FALSE |
| 382e9f4d997c89d86390ff1db5eac316  | 5 | 0.665479921351427 | FALSE |
| 1e5a5b3bc1ec5dcac873a685e4efed1d  | 5 | 0.665479921351427 | FALSE |
| 448092b5340d77b71bc09f3b5f6ba580  | 5 | 0.665479921351427 | FALSE |
| 90ce0670d0c5674699a2cd54638a8f13  | 5 | 0.665479921351427 | FALSE |
| db6999c4df54a3eee3136c6671fa3517  | 5 | 0.665479921351427 | FALSE |
| 0b22ed48eb3acaf7d1d9721c8b83cbdf  | 5 | 0.665479921351427 | FALSE |
| 69a0a9b3d2f25e615792f49a88477b76  | 5 | 0.665479921351427 | FALSE |
| e738239f47d0c43f0d59b1bbd3e5b262  | 5 | 0.665479921351427 | FALSE |
| cb16531b22a650335c98dcd66c2dafd   | 5 | 0.665479921351427 | FALSE |
| 84ec1399e8ee3618cc0686f28b89dbcb  | 5 | 0.665479921351427 | FALSE |
| b5b5ccf8d4b597516a51069273afe7c8  | 5 | 0.665479921351427 | FALSE |
| 8ecb3c546a958d83e04d925a962af7f6  | 5 | 0.665479921351427 | FALSE |
| 9ef7688ddcbba5179a5011ec2c64a228  | 5 | 0.665479921351427 | FALSE |
| 08bb29e76019a1d1ab85c15f745c3b07  | 5 | 0.665479921351427 | FALSE |
| f2c5e1386e7119686922dadcc0904088  | 5 | 0.665479921351427 | FALSE |
| 6552f4787f1b6115bf9c9cf04a0b836d  | 5 | 0.665479921351427 | FALSE |
| 9cb31a8163c8b8dc83dbb589443f06e1  | 5 | 0.665479921351427 | FALSE |
| 96145f0f0d8025639c22921be63a5696  | 5 | 0.665479921351427 | FALSE |
| be5ee53525a2da4275c32880c374493   | 5 | 0.665479921351427 | FALSE |
| 933096a8abba3ba26115619300c7b569  | 5 | 0.665479921351427 | FALSE |
| 13e78875b36fe62a172099127b50eca7  | 5 | 0.665479921351427 | FALSE |
| 213125af63c3c90e20e0e9e71cf103e5  | 5 | 0.665479921351427 | FALSE |
| d32ab6db74a0b97252425a6b4d99b4a9  | 5 | 0.665479921351427 | FALSE |
| 3fa9b1137ccd47fc0b8a5960215cd91d  | 5 | 0.665479921351427 | FALSE |
| b5ca209c65510a1622f68fa535441443  | 5 | 0.665479921351427 | FALSE |
| e747688049d7059f0721a86f541a58aa  | 5 | 0.665479921351427 | FALSE |
| fcdf3e1e3fd860c9a76a22fe6da59882  | 5 | 0.665479921351427 | FALSE |
| 7ef97632ab2d719134190b64d0e20481  | 5 | 0.665479921351427 | FALSE |
| 8c69b52248230f6661f7718a1dff9f26  | 5 | 0.665479921351427 | FALSE |
| 5c2fe78d3aa8a5952c3261269b857cc1  | 5 | 0.665479921351427 | FALSE |
| 3bdf3962a4d6b9738dc1bfa095f6cc8e  | 5 | 0.665479921351427 | FALSE |
| d0099ee91dbd9830ee9ca8100ee85747  | 5 | 0.665479921351427 | FALSE |
| 93da342980ee5d7587028b142860e326  | 5 | 0.665479921351427 | FALSE |
| f8bfa38966ea4a31ede4d309eff80d6f  | 5 | 0.665479921351427 | FALSE |
| 1a7a8f466b74b6b5e3497d10112cda38  | 5 | 0.665479921351427 | FALSE |
| 0e86e0627c7da65f03262253a0f36a37  | 5 | 0.665479921351427 | FALSE |
| 5f8fcfd5eae442ef695287a85c782c5d  | 5 | 0.665479921351427 | FALSE |
| b3f501eb848286a3758e9ce88eb51d01  | 5 | 0.665479921351427 | FALSE |
| c9afd558a3687a3ab1cb10e0979c6e26  | 5 | 0.665479921351427 | FALSE |
| f795c30a2d4c83ad90760a26b8948100  | 5 | 0.665479921351427 | FALSE |
| 763da75108822f3211c6f8852fecb09d  | 5 | 0.665479921351427 | FALSE |
| 0ea5e1ee42a9add6e20e4cea1e13e61b  | 5 | 0.665479921351427 | FALSE |
| fc16f182cda13158b7b53b99ec439473  | 5 | 0.665479921351427 | FALSE |
| 937130634699adf772e663b3206296108 | 5 | 0.665479921351427 | FALSE |
| 684661c135c9eac8d14167f4c0f04940  | 5 | 0.665479921351427 | FALSE |
| a2a66718d4e7cf14e217a7f6fd99900d  | 5 | 0.665479921351427 | FALSE |
| 25b00fbc430d7f939bd949e6460a84dd  | 5 | 0.665479921351427 | FALSE |
| 84a73b80b8405e0dddf23cf9f218acbc  | 5 | 0.665479921351427 | FALSE |
| e5ba1449f96ae19c21538f0ebf01b59e  | 5 | 0.665479921351427 | FALSE |
| 2deee102fe6514204af2bf0780bc1ac4  | 5 | 0.665479921351427 | FALSE |
| b987b751d2357f99e82610cc984b09e9  | 5 | 0.665479921351427 | FALSE |
| 5e6725e17a517802fd48cba3bc05c1c   | 5 | 0.665479921351427 | FALSE |
| 2fc9b7df35cf9b721acedcd9d3561cce  | 5 | 0.665479921351427 | FALSE |
| 23a7b18fbefa1fa371830e7db7876b29  | 5 | 0.665479921351427 | FALSE |
| 62a87d4db851644446615062d61d09e7  | 5 | 0.665479921351427 | FALSE |
| 99d5a4ffa07fc3904d57784b335f19bd  | 5 | 0.665479921351427 | FALSE |
| f0b16686cde37268349599e11a1f8790  | 5 | 0.665479921351427 | FALSE |
| 934f56716628cf3758baa5e7b702d2a1  | 5 | 0.665479921351427 | FALSE |
| 05583e0e12ac4607a40b2f17ce39e18   | 5 | 0.665479921351427 | FALSE |
| aec20e1a147e3f84f9794c1b9066aae4  | 5 | 0.665479921351427 | FALSE |
| 3b09d01fdbc5a425b7e984a53f59a9d8  | 5 | 0.665479921351427 | FALSE |



|                                   |     |                   |       |
|-----------------------------------|-----|-------------------|-------|
| 4581c03a9fbf22ca8d26d197945c5d06  | 5   | 0.665479921351427 | FALSE |
| 0e089dac21915d34e1ba6011443df2e9  | 5   | 0.665479921351427 | FALSE |
| 09b47236ecdcb4627b4f19dadfb2867   | 5   | 0.665479921351427 | FALSE |
| 57706cd140992bbd0d4e96a833912f45  | 5   | 0.665479921351427 | FALSE |
| 0d2a4db996f43b65f6249c118c8d424c  | 5   | 0.665479921351427 | FALSE |
| 1dee7a9043af345aeb0c01ef1f4473ae  | 5   | 0.665479921351427 | FALSE |
| 0f21e6a5615139dabd413632d1378dc6  | 5   | 0.665479921351427 | FALSE |
| 9bf47859277b18f7164e848576d8829f  | 5   | 0.665479921351427 | FALSE |
| 9243a3b81d2e0ffe7466f757fecb47f   | 5   | 0.665479921351427 | FALSE |
| 687bb3b3b1b09601bd3a0ac6eeca4f46f | 5   | 0.665479921351427 | FALSE |
| dff5823839d97156151935cda410bb6f  | 5   | 0.665479921351427 | FALSE |
| d6eb49be064bb019a8dbb28451f649c3  | 5   | 0.665479921351427 | FALSE |
| 0bab6eefa020ad40122cfff733972d7f3 | 5   | 0.665479921351427 | FALSE |
| 7b732016b53fc4c4128273ac1c83fae2  | 5   | 0.665479921351427 | FALSE |
| 6875c5259a37bc8844c092db19fec963  | 5   | 0.665479921351427 | FALSE |
| 1a2d11c18878fcdf1192fb22e7e45a93  | 5   | 0.665479921351427 | FALSE |
| 637acbf700723da791ff81b554634740  | 5   | 0.665479921351427 | FALSE |
| 4fe609069ddb659da47531c688130164  | 5   | 0.665479921351427 | FALSE |
| 7b897f5ab602ed700ec9c10d96fb997   | 5   | 0.665479921351427 | FALSE |
| 1b097ec2f993f8d93f006bdd6499a2b9  | 5   | 0.665479921351427 | FALSE |
| 3615fb777005e792f48281d9766a159a  | 5   | 0.665479921351427 | FALSE |
| 0b49776f60bc0f566ebe8585ec3c5e07  | 5   | 0.665479921351427 | FALSE |
| c45fba966a7c86503b38a13e121fad0a  | 5   | 0.665479921351427 | FALSE |
| e39d0106129d2cef95d226ab68163276  | 5   | 0.665479921351427 | FALSE |
| 69e91084b18e0bcb7404b6a55fc3b17f  | 5   | 0.665479921351427 | FALSE |
| e30af441c32096bbff179e10a8d80c75  | 5   | 0.665479921351427 | FALSE |
| a3fdee62edf9cb50662e84281124a241  | 5   | 0.665479921351427 | FALSE |
| 12b3baee9905c9965794265d33f8511e  | 5   | 0.665479921351427 | FALSE |
| 306a0dc859c17f4586aac1cbef4f7d45  | 5   | 0.665479921351427 | FALSE |
| af7584c5080425da5c5b2bf7a2045749  | 5   | 0.665479921351427 | FALSE |
| 8fea6fb414f3973c60bb3d9c9b396391  | 5   | 0.665479921351427 | FALSE |
| 858e61f4b80d4c21c57fb23e4adf00b9  | 5   | 0.665479921351427 | FALSE |
| f42fa1f361123808c5170776beea4f28  | 5   | 0.665479921351427 | FALSE |
| a3d55180fa1984a6ecd4e4cf7cd9621   | 5   | 0.665479921351427 | FALSE |
| 833e68d8409bfd0100f147d62868285d  | 5   | 0.665479921351427 | FALSE |
| bada4b4d5ec4bb02547d109017bddbf6  | 5   | 0.665479921351427 | FALSE |
| 1de11ca9bfc49d2a24f3217092474de5  | 22  | 0.676227110786361 | FALSE |
| e5d49fa90328817f763cd8e8f5b0eab1  | 22  | 0.676227110786361 | FALSE |
| 6da46d83d8eca17871b9937d084ea890  | 22  | 0.676227110786361 | FALSE |
| bab727ead750abea99848d1f7b760d7   | 71  | 0.678242374515425 | FALSE |
| 3b482b3f9da81db80a221a66031aa159  | 113 | 0.684135587722467 | FALSE |
| 476738e317c846bab51ab3cbefc92f1d  | 6   | 0.691475346686081 | FALSE |
| 39ca85a8156900264d039677c05ca2e8  | 6   | 0.691475346686081 | FALSE |
| db0a9bba4758c990e4d72f8558596479  | 6   | 0.691475346686081 | FALSE |
| c00181a21a8c5b8b22d1b2793f6fdb3   | 6   | 0.691475346686081 | FALSE |
| 0984f915f803bc5c24bf8e1c909ab5ca  | 6   | 0.691475346686081 | FALSE |
| 81d51386cb12c21a2f27ebdd8b9b2ccc  | 6   | 0.691475346686081 | FALSE |
| 375f634194a84d8e75ae82cf5a65769f  | 6   | 0.691475346686081 | FALSE |
| 642cd6c8b3c6a14c90307513a1249ea7  | 6   | 0.691475346686081 | FALSE |
| ff4647415dcccadee59cb477abc5de829 | 6   | 0.691475346686081 | FALSE |
| 771eef8a8acb8fe4bab03d049dd070fa  | 6   | 0.691475346686081 | FALSE |
| fc48628625c6ec016a4d57e4e6d3d5af  | 6   | 0.691475346686081 | FALSE |
| a810d316616fb1a7321351393c70ae70  | 6   | 0.691475346686081 | FALSE |
| 42adb322e812d7d110c13bc5c582464f  | 6   | 0.691475346686081 | FALSE |
| f54538c9fe78a2491a7365d46ac7d04a  | 6   | 0.691475346686081 | FALSE |
| 5440bb497433d6fb4d592fc9dc4115fc  | 6   | 0.691475346686081 | FALSE |
| 846d9bb062cdef518cf911cb5f2f48e   | 6   | 0.691475346686081 | FALSE |
| bfd5a200f7cbc8ed661fb5e5659b809e  | 6   | 0.691475346686081 | FALSE |
| d7d8e9ca0bb47e48bb7b11010bf44cd9  | 6   | 0.691475346686081 | FALSE |
| 19032423b2abbba6747425ffe54db960  | 6   | 0.691475346686081 | FALSE |
| 24578f723e54aac8e9d917365bfc8d87  | 6   | 0.691475346686081 | FALSE |
| cf82d65756dce349e1df6b64ab983821  | 6   | 0.691475346686081 | FALSE |
| 9c6f2b50ecee1d000f4981af2d9ab517  | 6   | 0.691475346686081 | FALSE |
| b7a90c7afe20bf32a35c949e18984553  | 6   | 0.691475346686081 | FALSE |
| 2cfc396eb5f251d5f5142811640f757   | 6   | 0.691475346686081 | FALSE |
| 128494a261f2bae571bb1058b52c687a  | 6   | 0.691475346686081 | FALSE |
| b493b2e590a925aa8aa5e8e5ef559dfd  | 6   | 0.691475346686081 | FALSE |
| 6645ac6e01b54dbf89dcb1a3515e387f  | 6   | 0.691475346686081 | FALSE |
| eeb6eda609da001bc1cda61fcd1f67b   | 6   | 0.691475346686081 | FALSE |
| 0fc819b99aeaa0ffa6d9db40378b17    | 6   | 0.691475346686081 | FALSE |
| d89b8bf4cf0e4e17fe46c0d214238584  | 6   | 0.691475346686081 | FALSE |
| 20ed485a649cc0f03dd3cf2b9a488a22  | 6   | 0.691475346686081 | FALSE |
| 74df131c4c31e7469f7f1f4d93cf57d   | 6   | 0.691475346686081 | FALSE |
| 64a76d1d022bade634287ace4305d5c4  | 6   | 0.691475346686081 | FALSE |
| 99b0ace8f5564cc9f51d62e073d1389f  | 6   | 0.691475346686081 | FALSE |
| c05eef21fa88381de2bcb04b003bcad6  | 6   | 0.691475346686081 | FALSE |
| 38e37205b8f101040fafa39445a00687  | 6   | 0.691475346686081 | FALSE |
| 7e28ca07fa82d553ff3e2eb951f96b1e  | 6   | 0.691475346686081 | FALSE |
| 2862752121447c336cdaee1089c3bf9d  | 6   | 0.691475346686081 | FALSE |
| cf5aa32bd4779c561a79d9ca35a8a21   | 6   | 0.691475346686081 | FALSE |
| d6a07a207695e918c576157088e00158  | 6   | 0.691475346686081 | FALSE |
| 69d658abc0bc72ff78e01244a0620d0   | 6   | 0.691475346686081 | FALSE |

|                                  |    |                    |       |
|----------------------------------|----|--------------------|-------|
| 78c77fe65ef85f77876913afafaf83ca | 6  | 0.691475346686081  | FALSE |
| 21f57b10a24af2d07ef8bb29fde77308 | 6  | 0.691475346686081  | FALSE |
| fbe1441247a95ff2154e296ce755b02  | 6  | 0.691475346686081  | FALSE |
| 19faab0613301c627436bea7ba130c03 | 6  | 0.691475346686081  | FALSE |
| c372b43be47a60debbdb8ba645c4f3b  | 6  | 0.691475346686081  | FALSE |
| 4281f5b1a9d4da51b4f84a86734e3016 | 6  | 0.691475346686081  | FALSE |
| 33fb7c931529eaff0ba2653fe5e55a4  | 6  | 0.691475346686081  | FALSE |
| 54eaa3dad1c82a5c1a864cb36dfa00a8 | 6  | 0.691475346686081  | FALSE |
| 09654246eee58793bd55f4f2e8866c94 | 6  | 0.691475346686081  | FALSE |
| 1554445ec0f58f8f3aa89d4c19f6ca5  | 6  | 0.691475346686081  | FALSE |
| 725c3ce493fc20f290177b3cd00ac157 | 6  | 0.691475346686081  | FALSE |
| d17be2e7da52698326ae236a7e80bf0c | 6  | 0.691475346686081  | FALSE |
| 5f8ae198552bc39633ea5c3962946313 | 6  | 0.691475346686081  | FALSE |
| 07b2282aba42b7a552743011db8094f6 | 6  | 0.691475346686081  | FALSE |
| 3e9db007ba1ad11c10840b072cf82ac9 | 6  | 0.691475346686081  | FALSE |
| ba2abd56e0c62e84a281b252c0ecf2c4 | 6  | 0.691475346686081  | FALSE |
| ac58e247b4b4dc9952a63a8768842531 | 6  | 0.691475346686081  | FALSE |
| f0c33566b57c73834e6715e4f843280f | 6  | 0.691475346686081  | FALSE |
| 3447bba88a77090a6e1f60be2df80a8d | 6  | 0.691475346686081  | FALSE |
| c9495d05babd9ff3d12861c52ac48b10 | 6  | 0.691475346686081  | FALSE |
| cf1c154dda5617a313977704c70b4fea | 6  | 0.691475346686081  | FALSE |
| 665c06c0446675030ffb92788fbc2972 | 6  | 0.691475346686081  | FALSE |
| de755d7719f17159286b670fb8ec8452 | 6  | 0.691475346686081  | FALSE |
| f4009a122f9d6677ef2cc595acd70db1 | 6  | 0.691475346686081  | FALSE |
| 023f6419e31912178c881067c038cbe8 | 6  | 0.691475346686081  | FALSE |
| 0ba7ab54477ac1e358b95b12ae47cfd  | 6  | 0.691475346686081  | FALSE |
| e5efb19c8e76cad58107d2acd1913b91 | 6  | 0.691475346686081  | FALSE |
| 282cf87787bf8bc13d8469ce93ea9a83 | 6  | 0.691475346686081  | FALSE |
| 37593875f248af0a9f8a410adae37818 | 6  | 0.691475346686081  | FALSE |
| e53ed171ef0054d5828f13109e670473 | 6  | 0.691475346686081  | FALSE |
| 0122b585024361ddaee2c8d00f210974 | 6  | 0.691475346686081  | FALSE |
| 88a665d3728e9f8cb9660a1ce9b3c3bf | 6  | 0.691475346686081  | FALSE |
| 05e59e6acfa67481514206aea60b5817 | 6  | 0.691475346686081  | FALSE |
| ce83fc423e41adb5b0ed8d2efc692b   | 6  | 0.691475346686081  | FALSE |
| 9c23f56aa5a85f3d6ff72ab45dd6a8eb | 6  | 0.691475346686081  | FALSE |
| e6bb8eaaac8196675f99a78761aefab9 | 6  | 0.691475346686081  | FALSE |
| 6bc1b948bdac137349310bd8e6822f34 | 6  | 0.691475346686081  | FALSE |
| e41b96f0ca69f99a45f8985d840fde43 | 6  | 0.691475346686081  | FALSE |
| 4202b2ba3e89e89d60d5e1657251a277 | 6  | 0.691475346686081  | FALSE |
| 3a75c7fcc9371c1129d5e490067b5473 | 6  | 0.691475346686081  | FALSE |
| 302e745422686c8b40fecf517ec856ca | 6  | 0.691475346686081  | FALSE |
| d1cb4ea8ba58a5e6d1be97779e72dd3b | 6  | 0.691475346686081  | FALSE |
| 5b115c09c95c3a6b956d53d2f1884614 | 6  | 0.691475346686081  | FALSE |
| fac0a19f742f17a596e1554f6f94542e | 6  | 0.691475346686081  | FALSE |
| 92ea3b676285053413ddb4f880f2a4d5 | 6  | 0.691475346686081  | FALSE |
| 8f339184fac227ee4142a3554f5cc64f | 6  | 0.691475346686081  | FALSE |
| f2b214c47f5b29b3edb289a3fd95dca  | 6  | 0.691475346686081  | FALSE |
| 1e85713d0ee4b69c1ba7b57fecce1e7e | 6  | 0.691475346686081  | FALSE |
| 1ae8041320c459acb58d90d8a1b346   | 6  | 0.691475346686081  | FALSE |
| f44603f6b65d6c112a977783a13461f5 | 6  | 0.691475346686081  | FALSE |
| 8de8c318baec968219319f50f648af60 | 6  | 0.691475346686081  | FALSE |
| 67e330de0289f13cf25c1f4ac71dbf19 | 6  | 0.691475346686081  | FALSE |
| 9729d58a6a7dd9ddc2d0977cc7b68cf  | 6  | 0.691475346686081  | FALSE |
| 2bbafcd6fea1b9cbbc86104090b6bf8  | 6  | 0.691475346686081  | FALSE |
| 64485352a43d56f50f1b3a5f3167b0a4 | 6  | 0.691475346686081  | FALSE |
| 1509e5bbabd9d1c71b407a0ac218e46b | 6  | 0.691475346686081  | FALSE |
| a5dcc6de4c99de98137e828069413f13 | 6  | 0.691475346686081  | FALSE |
| 04e24a19d69d50187392f3b293672907 | 6  | 0.691475346686081  | FALSE |
| 9da052e6c59fcdcf34e1afb8be933f   | 6  | 0.691475346686081  | FALSE |
| abbdde2546c73e95a40fa010995d2818 | 6  | 0.691475346686081  | FALSE |
| 29cfe68fe8b380a7be28a396d32cb6ab | 6  | 0.691475346686081  | FALSE |
| 725fdb050bbeefec541866c137e9c50a | 6  | 0.691475346686081  | FALSE |
| eb2594d058017aaba416b552608fa95f | 6  | 0.691475346686081  | FALSE |
| 8115bfdc03a0ef73ed285dc9716fc0f5 | 6  | 0.691475346686081  | FALSE |
| b62deda5ed36b8c96b0acc4011f0001a | 6  | 0.691475346686081  | FALSE |
| 9f6e744b36e913bb4649329926fbfee2 | 6  | 0.691475346686081  | FALSE |
| 96714a6842a401aa4fecabff7a334c5f | 6  | 0.691475346686081  | FALSE |
| 2a7d7d28b641f4285a458ca5cfacd950 | 6  | 0.691475346686081  | FALSE |
| 6cc51fe5dd109eb6363c531f2ff6660  | 6  | 0.691475346686081  | FALSE |
| 3a228aeb41029dad281ee5d1ad796636 | 6  | 0.691475346686081  | FALSE |
| 511bf33ffff1bc6d33e8b7024543008d | 6  | 0.691475346686081  | FALSE |
| 8839f92e94f7eaa6b15070cdd3a35932 | 6  | 0.691475346686081  | FALSE |
| d04db31eb1abae895d806b53ef3e6d33 | 6  | 0.691475346686081  | FALSE |
| f018335ed27f4ebb1191e4b07133ba72 | 6  | 0.691475346686081  | FALSE |
| 8210bde00785df70ea9736d5be8363a  | 38 | 0.694321371129945  | FALSE |
| e73d7f3f0353d7c592d2e13108551f31 | 23 | 0.69531093863704   | FALSE |
| d881f447ded933c782b33f0ed029eb81 | 24 | 0.7134444141883855 | FALSE |
| 6df3a5390512a230ba46b8f69c083579 | 24 | 0.7134444141883855 | FALSE |
| 78bade5ebbe4174d8be9924c6185e63f | 7  | 0.715499807394952  | FALSE |
| 000653cdb81bc81c8296b722a5cfaa0a | 7  | 0.715499807394952  | FALSE |
| 849d52ff327105ded96e282fe1bd3b62 | 7  | 0.715499807394952  | FALSE |
| 35ff75125aac19c43b821d31def91a6  | 7  | 0.715499807394952  | FALSE |

|                                   |     |                   |       |
|-----------------------------------|-----|-------------------|-------|
| f6abd5e319f04daef391a2e5654004f   | 7   | 0.715499807394952 | FALSE |
| 30dbe645e8a27035b82f3e2724544d5e  | 7   | 0.715499807394952 | FALSE |
| 6e5b0b6f7e2bb31c463b644e85bd992   | 7   | 0.715499807394952 | FALSE |
| 6861dd72bd088689e5dfef66bf7e4135  | 7   | 0.715499807394952 | FALSE |
| 9c2ebf8f2921e2d7bb2e2270607342fa  | 7   | 0.715499807394952 | FALSE |
| 673173eec4db0acd7101cf10a16b6866  | 7   | 0.715499807394952 | FALSE |
| 18786531e995f35bfaf6e938d96ec702  | 7   | 0.715499807394952 | FALSE |
| af6374578fd7c52c9e70103c558b23ad  | 7   | 0.715499807394952 | FALSE |
| 5606b84bea115e968c56e015ba80be07  | 7   | 0.715499807394952 | FALSE |
| 6047e1cd01fa98962f888d9f00cbfa6e  | 7   | 0.715499807394952 | FALSE |
| d1de072c491257d797a532babbf5764a  | 7   | 0.715499807394952 | FALSE |
| 15329d5033e2beb83d980271241d8308  | 7   | 0.715499807394952 | FALSE |
| d1cfb51391363f63a2a4dae00098c508  | 7   | 0.715499807394952 | FALSE |
| 9f7c2bd6ef46996c8c194978d581c879  | 7   | 0.715499807394952 | FALSE |
| 5ce34ff294c4eb73dadb425696c47c60  | 7   | 0.715499807394952 | FALSE |
| 4cad7317878ea3b34ff87a0aae89c58   | 7   | 0.715499807394952 | FALSE |
| 75dcf4386d37d4fc0f8d2e6b17ecab8a  | 7   | 0.715499807394952 | FALSE |
| 1579f92d06c86388b8afd5ff14a3b211  | 7   | 0.715499807394952 | FALSE |
| d7f2dea2af5078b6b71563ab7cd6eaa   | 7   | 0.715499807394952 | FALSE |
| f9f6d2c29406a1846e6da618176b1e21  | 7   | 0.715499807394952 | FALSE |
| cd46e01b7ade82713425c980e460e5ad  | 7   | 0.715499807394952 | FALSE |
| 426ca56efb6816b00bdf050ab01d0d0f  | 7   | 0.715499807394952 | FALSE |
| 24216962fb504c3ce0264bf24d1f9cb5  | 7   | 0.715499807394952 | FALSE |
| 84d7876514c79823177f54c6bad6c2b9  | 7   | 0.715499807394952 | FALSE |
| bb7baf63968d36cf1bfbd5fcd580ed70  | 7   | 0.715499807394952 | FALSE |
| 8b85eaaafd6c5e4b10a90a4a32790e4b  | 7   | 0.715499807394952 | FALSE |
| 5d9b474ea44d8ca1f55007f87e53a13c  | 7   | 0.715499807394952 | FALSE |
| a46eeca1b1204fe087c1f15fb2e7cf55  | 7   | 0.715499807394952 | FALSE |
| 9b2e53b19d862d6826f6bebe3d423e618 | 7   | 0.715499807394952 | FALSE |
| 8181046c6027b76fecba11accf9ef8c   | 7   | 0.715499807394952 | FALSE |
| e95ef791d06b1d2f990345ee53ca21b8  | 7   | 0.715499807394952 | FALSE |
| d3a26f6c315d1c86b14b88e81af8e3fc  | 7   | 0.715499807394952 | FALSE |
| 5c6edb849229155a7f835f12505003fd  | 7   | 0.715499807394952 | FALSE |
| 93b6acf12ab28286f735e299fcd7e3e   | 7   | 0.715499807394952 | FALSE |
| 985c885e396f1e7ea883ebe31b3e3e66  | 7   | 0.715499807394952 | FALSE |
| 09595e80206d35b965f4cce02b2f48c3  | 7   | 0.715499807394952 | FALSE |
| 30658a6c43516aafec4b553b81e6b8d   | 7   | 0.715499807394952 | FALSE |
| 4ec764dc072f2f639a74752149d1b9ef  | 7   | 0.715499807394952 | FALSE |
| b6c6e727b8a2b38f3fe4236aab51182   | 7   | 0.715499807394952 | FALSE |
| d2851be2899896813406335f097e0766  | 7   | 0.715499807394952 | FALSE |
| 3b8a7748b36653caf4a339c462aeece7  | 7   | 0.715499807394952 | FALSE |
| c219cba5ccdd765a396f14d20423f45d  | 7   | 0.715499807394952 | FALSE |
| b3c39c59af5fea7457921f190fddf246  | 7   | 0.715499807394952 | FALSE |
| fddb21906df27ed56154006167998223  | 7   | 0.715499807394952 | FALSE |
| 2060cd013f6f8e1fdafa2e4fb5f9105c  | 7   | 0.715499807394952 | FALSE |
| 9068298bbfe44765abf5d4b36326b8f3  | 7   | 0.715499807394952 | FALSE |
| f07c42e5c7ba021de7b60091ed440e76  | 7   | 0.715499807394952 | FALSE |
| 09c3e7640cd22403cb1b069579db6645  | 7   | 0.715499807394952 | FALSE |
| cd615ef0610acbcbf4bafa1586ad08ee  | 7   | 0.715499807394952 | FALSE |
| e0287daf63905b8cf23ad925f12009b2  | 7   | 0.715499807394952 | FALSE |
| 6dd8a4fb3215ac145571b0079405a312  | 7   | 0.715499807394952 | FALSE |
| a116c09afca2ad940b8906ca4c225822  | 7   | 0.715499807394952 | FALSE |
| 8d8bd5de425b80441258f27801cd9f6   | 7   | 0.715499807394952 | FALSE |
| 75c37c29a6bc563618b656d63a21976b  | 7   | 0.715499807394952 | FALSE |
| f40ca23c1724abd681edb4205954c756  | 7   | 0.715499807394952 | FALSE |
| a8b203461e5cfead0462ac1dcfee07c0  | 7   | 0.715499807394952 | FALSE |
| 1c132342410d69d37d82a2aed3bfb05   | 7   | 0.715499807394952 | FALSE |
| dc41358fd306fc1053d80935c0ddf0b7  | 7   | 0.715499807394952 | FALSE |
| 073ce754d4fdbcb4e4828e63e4a6387fe | 7   | 0.715499807394952 | FALSE |
| 9bfc9ecb4864e67cd7d432a627d7fe11  | 7   | 0.715499807394952 | FALSE |
| a84ac8fc73810467a41d4b54da068bf0  | 7   | 0.715499807394952 | FALSE |
| 169fb216a12f673fcd8d8c5b5de35a82  | 7   | 0.715499807394952 | FALSE |
| 00d9ad4346446bcd2b34269f283f39ff  | 7   | 0.715499807394952 | FALSE |
| ee52da5d4bb76047ccf285398cad8f73  | 7   | 0.715499807394952 | FALSE |
| 978ba7cb1df2117169afd062d0dbe46   | 7   | 0.715499807394952 | FALSE |
| 71c9b7fd6b750486bdf5c59543b98a6e  | 7   | 0.715499807394952 | FALSE |
| f4d5b9520fb5e0c48fd3afb1fc9a5047  | 7   | 0.715499807394952 | FALSE |
| c65b7d39ebce1feb1d58e27aee1bca47  | 7   | 0.715499807394952 | FALSE |
| 9c439916915fd3dba65264406eb263ba  | 7   | 0.715499807394952 | FALSE |
| a91695ef6eb933fc1a78804ad848ca05  | 7   | 0.715499807394952 | FALSE |
| 5c046402b9d4eda1925b61e367712fbc  | 7   | 0.715499807394952 | FALSE |
| a4591400fc7d7ddf8843573260636cca  | 7   | 0.715499807394952 | FALSE |
| 1aa75dad1dee675701b42a805fb0d42b  | 7   | 0.715499807394952 | FALSE |
| a0999abb73d84e91d5134d80528ef229  | 7   | 0.715499807394952 | FALSE |
| 4d4c903ae6df84e7f79fbc3ecfc19268  | 7   | 0.715499807394952 | FALSE |
| d0b698c7298bf04110a6d2f220879bfb  | 431 | 0.725498775526386 | FALSE |
| be895bf9176954ab8f55e2c2e1d4e047  | 25  | 0.730657519292985 | FALSE |
| 2ed220cab9db0862029af74d35ffba4   | 25  | 0.730657519292985 | FALSE |
| d8cb744c811fa780dd595cf6df39bc60  | 25  | 0.730657519292985 | FALSE |
| 135727b4f47cd8732a2707eca12fcd    | 8   | 0.737699001068447 | FALSE |
| 170d6813dfbe0ce95dc78d234a5b7155  | 8   | 0.737699001068447 | FALSE |
| bd6e442e02ccd1c8d74c8632a93d3648  | 8   | 0.737699001068447 | FALSE |

|                                  |     |                   |       |
|----------------------------------|-----|-------------------|-------|
| 518b140a9a79e87da975636f1e42f403 | 8   | 0.737699001068447 | FALSE |
| e0de3364d91c93c955f117c62e66a9d6 | 8   | 0.737699001068447 | FALSE |
| 769de0c67929c3c1a4007c54642dfc34 | 8   | 0.737699001068447 | FALSE |
| b5e089a90fc5455638f85de23bb20993 | 8   | 0.737699001068447 | FALSE |
| 80098ec13d5319e6024df22a32d16bd  | 8   | 0.737699001068447 | FALSE |
| 49c5631b22e3c8af1bcf6caf37d3ff7d | 8   | 0.737699001068447 | FALSE |
| 62169a1df5dd845f1a7de084c2219327 | 8   | 0.737699001068447 | FALSE |
| 42322165cfa8b7b298ef6e3516d0f4a3 | 8   | 0.737699001068447 | FALSE |
| 97a36b566a19741b7e7c108e99a678a  | 8   | 0.737699001068447 | FALSE |
| 11b24486ce2911727bd082a6d0bd868b | 8   | 0.737699001068447 | FALSE |
| 6d8da19cf86ecb2c26f21b692f794071 | 8   | 0.737699001068447 | FALSE |
| Oca19cdac2fb9198a038aff1281a5e10 | 8   | 0.737699001068447 | FALSE |
| 18a5046a2252d72a8f9a425127ee63c4 | 8   | 0.737699001068447 | FALSE |
| b161a9890947c468aade8a7f27ccc163 | 8   | 0.737699001068447 | FALSE |
| a8b23d869d9990033ef96272f0fc119  | 8   | 0.737699001068447 | FALSE |
| 6de665187bcc484ed4efad4465646a05 | 8   | 0.737699001068447 | FALSE |
| 69eb16a95fa594304be5c161c6b15c9e | 8   | 0.737699001068447 | FALSE |
| f14a4043d5ce3e764003e5fce86495e0 | 8   | 0.737699001068447 | FALSE |
| daaab96173b74ef79fd1ae4f0e9457b  | 8   | 0.737699001068447 | FALSE |
| 3016b2fab82ed08fb5585b175919df6  | 8   | 0.737699001068447 | FALSE |
| d2ad8ffb9c564a7a919a6d2c2ea25bb4 | 8   | 0.737699001068447 | FALSE |
| 1b6acfec1f1d9d018036a1e275703706 | 8   | 0.737699001068447 | FALSE |
| 67fd3a3f3f8db748efbe268136dfbde  | 8   | 0.737699001068447 | FALSE |
| 4ce4c3a69273ce1cc8fd219da9b381d4 | 8   | 0.737699001068447 | FALSE |
| 11c23f6cbbddf03bd8e6224a9071fb43 | 8   | 0.737699001068447 | FALSE |
| f40c0d4d9e06093a5ada229490ba0568 | 8   | 0.737699001068447 | FALSE |
| 9ee2b7f0b9e9c362f67a773511bc0f8f | 8   | 0.737699001068447 | FALSE |
| 6232643e6f00d30f14f28555f4d3aeb3 | 8   | 0.737699001068447 | FALSE |
| bd51e684722285320e57f327eca15b6b | 8   | 0.737699001068447 | FALSE |
| 0789caf27bf5974dcea4d8031951972a | 8   | 0.737699001068447 | FALSE |
| 6d113989510223e4c6dbd981301f7212 | 8   | 0.737699001068447 | FALSE |
| 0522bfa94eba6ceddf15a808b6ae96b7 | 8   | 0.737699001068447 | FALSE |
| ae12d30bf4100c4d96adc3ca43677698 | 8   | 0.737699001068447 | FALSE |
| 233979536096fdadb5a84680c813451  | 8   | 0.737699001068447 | FALSE |
| 24df451d973741ec25daf4a0faabb381 | 8   | 0.737699001068447 | FALSE |
| a31bd41aba32e4789d6da6371e8a0351 | 8   | 0.737699001068447 | FALSE |
| 4cf9490af23af672d19005d40819f32a | 8   | 0.737699001068447 | FALSE |
| d9681b85947e3afdf94497149ef007f  | 8   | 0.737699001068447 | FALSE |
| 8817c9e2e994bf779d0d9871bfaab685 | 8   | 0.737699001068447 | FALSE |
| fc2be12ee7778a775c5e96a7e119d6d4 | 8   | 0.737699001068447 | FALSE |
| 47601118850e3bfedf4909d626f8ac75 | 8   | 0.737699001068447 | FALSE |
| 5ee7c51bcfa27a4b318bfb90a7fb84c5 | 8   | 0.737699001068447 | FALSE |
| 5a300b9a353ac9001a36a58e3306a300 | 8   | 0.737699001068447 | FALSE |
| e6552817f250085328087b23ab0dc1a9 | 8   | 0.737699001068447 | FALSE |
| 085bc0620ad4765efb14c77f0959bdef | 8   | 0.737699001068447 | FALSE |
| f30c82900b5992c0322e1142908bbe21 | 8   | 0.737699001068447 | FALSE |
| 1c12865114a7479a355a5314a0962ff4 | 8   | 0.737699001068447 | FALSE |
| 5608c3e6c9de9ceb79610e7786bd0ac4 | 455 | 0.73908199478054  | FALSE |
| b39c338f5e964b6cb87e07f10badc6c4 | 26  | 0.746982706665468 | FALSE |
| 749e45bde9313270898b93b8c4becd90 | 26  | 0.746982706665468 | FALSE |
| e33b20a92e8323c00165fd246aa9a5ce | 26  | 0.746982706665468 | FALSE |
| e9c0e61a0dcfb70f290be826a755c503 | 9   | 0.758208132672148 | FALSE |
| b36996030f130f5113ee26664007dc10 | 9   | 0.758208132672148 | FALSE |
| 23a6b01030772ac2e83ffc6a9ec32215 | 9   | 0.758208132672148 | FALSE |
| 3e039130d1c5ce6ee3bf389b3e16a6c7 | 9   | 0.758208132672148 | FALSE |
| 3e78c2d4071900023caf060ad6e4aea3 | 9   | 0.758208132672148 | FALSE |
| c3a4eb91dcbf4532380498b716445ae3 | 9   | 0.758208132672148 | FALSE |
| 680be3278c6b80b1b8d60bbfca191947 | 9   | 0.758208132672148 | FALSE |
| dbd8c548553b3b93df3ac057d7d2cb56 | 9   | 0.758208132672148 | FALSE |
| eb872b492619292ca3b24e42f436f99c | 9   | 0.758208132672148 | FALSE |
| fb8f2032bbe5e226156ce9778d2509af | 9   | 0.758208132672148 | FALSE |
| 0c1c7ad5d0260ba6e3bdcc9590c3c2c8 | 9   | 0.758208132672148 | FALSE |
| 5322c1b4520bfe8d265dfc591df5a64d | 9   | 0.758208132672148 | FALSE |
| c3b153bdcbcb594c78f50e103ff2b2d  | 9   | 0.758208132672148 | FALSE |
| ad73f4ab37e8e5f7ab14dee5df5c5ae  | 9   | 0.758208132672148 | FALSE |
| b2c3bb2ac840eba4aa8a9cd75f8bc4d6 | 9   | 0.758208132672148 | FALSE |
| 01080e9f6920e834dd4353e0006970be | 9   | 0.758208132672148 | FALSE |
| 0b974216c890cb7d7f1b671e54adc25d | 9   | 0.758208132672148 | FALSE |
| b34dc93f446851e20b7664594eefea4a | 9   | 0.758208132672148 | FALSE |
| 9422fd782051bd35570c28bc5c811c7  | 9   | 0.758208132672148 | FALSE |
| 4ae9adef4e7cf64f39d31521ce36fe69 | 9   | 0.758208132672148 | FALSE |
| 6fc9ce36185f7f68f3a3e677c395f7fd | 9   | 0.758208132672148 | FALSE |
| dd1b70afcfca1df0f341790f1a2c1e1  | 9   | 0.758208132672148 | FALSE |
| cc89995866a6e6077eea2beb57f8a512 | 9   | 0.758208132672148 | FALSE |
| bf6225734b915ae3e034aaf5cab2fc2  | 9   | 0.758208132672148 | FALSE |
| a51bfff8dc3d75cc03636e70bbfaf47b | 9   | 0.758208132672148 | FALSE |
| 5281eb7b2a57c232332fddd223fe88f5 | 9   | 0.758208132672148 | FALSE |
| 0e7017c0ccd789c11023b2baaa6aab3b | 9   | 0.758208132672148 | FALSE |
| 35bbc323229797ab3654d3eb5d1dccb7 | 9   | 0.758208132672148 | FALSE |
| 50b02ed56e5bd7071bd7b387464838b7 | 9   | 0.758208132672148 | FALSE |
| 145042b121fb19b759c9a71cfd6c3b11 | 9   | 0.758208132672148 | FALSE |
| 070502fc07b0ab293ac6d73549d3b974 | 9   | 0.758208132672148 | FALSE |

|                                   |     |                   |       |
|-----------------------------------|-----|-------------------|-------|
| 2d88b9122b9b887f026e2147867bc8df  | 9   | 0.758208132672148 | FALSE |
| 8a6ff32f51d7c2b5feb3a3c4507ddbcd  | 9   | 0.758208132672148 | FALSE |
| f3382394a5a2e3263ec1b9462ea0b56   | 9   | 0.758208132672148 | FALSE |
| 393d85b4c2886b63cdb62e812d38b2af  | 9   | 0.758208132672148 | FALSE |
| 53d442e1e344ed5313bcc6bbd17496e2  | 9   | 0.758208132672148 | FALSE |
| 1e5faad8ce74f2172060dba245f52f96  | 9   | 0.758208132672148 | FALSE |
| b944e446e87fa7a72fe2cccb95deee14  | 135 | 0.762399939224698 | FALSE |
| 31fafc31f41c40a6477d2bc148624981  | 27  | 0.762451888237852 | FALSE |
| 62ef06b414289af582c84fd276bd945   | 27  | 0.762451888237852 | FALSE |
| 53be6d7e62277b36a2809a2301b96b9a  | 43  | 0.764801684642535 | FALSE |
| 23443f6140da99fd12fc5b0c4720a271  | 28  | 0.777097544572831 | FALSE |
| da6a820d6236082bbe9da8395ecc162   | 28  | 0.777097544572831 | FALSE |
| 6f2414f3216c719e8f1a44de9f625c94  | 10  | 0.777152650112269 | FALSE |
| 5e4049b68851f2ee269dcac5f0f90322  | 10  | 0.777152650112269 | FALSE |
| 09b48cd4c1f3fc619ba1f437dae36dc   | 10  | 0.777152650112269 | FALSE |
| 11e23ea5f65f90c78651bcbe86b74191  | 10  | 0.777152650112269 | FALSE |
| 4c457a70243c649760a1811351afeb0c  | 10  | 0.777152650112269 | FALSE |
| 257b9d2aab382808563d7f42d38d6964  | 10  | 0.777152650112269 | FALSE |
| 75fab318c01fbc0d769ab98f3d328f12  | 10  | 0.777152650112269 | FALSE |
| f91246e65ef54a6eb9ffc444cba10f4   | 10  | 0.777152650112269 | FALSE |
| 0d0042373110580057296869406719fa  | 10  | 0.777152650112269 | FALSE |
| 38347f00c351f6a8b58265d41aaa725   | 10  | 0.777152650112269 | FALSE |
| 91101303b2fa23ed605482c99f27db6b  | 10  | 0.777152650112269 | FALSE |
| c8c110fa739e613f951fae412d6f9f1   | 10  | 0.777152650112269 | FALSE |
| 126c4c4926f559db383ec0b8320bfac2  | 10  | 0.777152650112269 | FALSE |
| e683f1888d6f1ab46f404be9a98d7a3e  | 10  | 0.777152650112269 | FALSE |
| fcda020e2366b6eb9a4f922739f4e6ab  | 10  | 0.777152650112269 | FALSE |
| 42813a7ac2260688d1e5de0f12a3bf78  | 10  | 0.777152650112269 | FALSE |
| bd51a40a24ebd30ef796a7d484fbcd55  | 10  | 0.777152650112269 | FALSE |
| dccb9df56eb71cad4bfff7ed8431a7552 | 10  | 0.777152650112269 | FALSE |
| f0f33d61309d8999591d129526908ddd  | 10  | 0.777152650112269 | FALSE |
| 33cdd6119240b68f35d70c12fc0aafa6  | 10  | 0.777152650112269 | FALSE |
| 32480562e8e85d61074673393aa0ec7b  | 10  | 0.777152650112269 | FALSE |
| 47adf6684fda1d186def383b96fee3c   | 10  | 0.777152650112269 | FALSE |
| 74d46334ea0cf84cc845e9b24acc55a   | 10  | 0.777152650112269 | FALSE |
| c37fa601378354e8583bb4334eb4e041  | 10  | 0.777152650112269 | FALSE |
| addf1e3d60f6910392223e40dcfa898b  | 10  | 0.777152650112269 | FALSE |
| 106c1bcf09642488d48e631dc007f515  | 10  | 0.777152650112269 | FALSE |
| 4c476bff9c90e545caf52abf2433741   | 10  | 0.777152650112269 | FALSE |
| 627857f1adf233e328b08b9f4ac9b055  | 10  | 0.777152650112269 | FALSE |
| 6f5da0517a69410b3b7702e321396052  | 10  | 0.777152650112269 | FALSE |
| 7fba832c4a81a2dc868d445e56d77ec9  | 10  | 0.777152650112269 | FALSE |
| 73e59f5f5a61052a6e7255dd9a08aeca  | 10  | 0.777152650112269 | FALSE |
| 7a21c9fea813dd4d7670e06c88be9aa7  | 10  | 0.777152650112269 | FALSE |
| 70b3e46a9f56d2957a5da8bbcc4108cc  | 10  | 0.777152650112269 | FALSE |
| ad796ee030e064cce08108c72a91eeee6 | 10  | 0.777152650112269 | FALSE |
| 1b156a3626c51ee68eafec90c33e0734  | 95  | 0.780667151943677 | FALSE |
| b9d2c93750a12ff7981a77e82f6a1547  | 29  | 0.790952233328766 | FALSE |
| 4224ae75b61b4c9687df8ff56db506ee  | 29  | 0.790952233328766 | FALSE |
| d63133c757e4c822d016db3aaa83f83   | 11  | 0.794648929648909 | FALSE |
| 3044fec0f8b0b1e86e093d156925713c  | 11  | 0.794648929648909 | FALSE |
| d960f6eb68bf555c7af553d60d44c613  | 11  | 0.794648929648909 | FALSE |
| 8a3bcb66a63e718322795fb3cf5786ba  | 11  | 0.794648929648909 | FALSE |
| f52e34a07ff2e814f50950ea181cb271  | 11  | 0.794648929648909 | FALSE |
| 0c97cf0c7f9074bda3693bd7391dfd4   | 11  | 0.794648929648909 | FALSE |
| 1e7e1e01adb7640a6a7d607cb61de9ea  | 11  | 0.794648929648909 | FALSE |
| 6728d5bea5db1509d2bc27d229d9065a  | 11  | 0.794648929648909 | FALSE |
| c720ca5d5668c68cf397a7fc3dd7fc92  | 11  | 0.794648929648909 | FALSE |
| 7581960d6d42d279720ae6185de9891a  | 11  | 0.794648929648909 | FALSE |
| fd7410edb0e0122ad8c41680a0c8cf7f  | 11  | 0.794648929648909 | FALSE |
| eb30fe79ff2790662309c17e86b78943  | 11  | 0.794648929648909 | FALSE |
| d88a6c6c55c19b1066649b6d8e929f74  | 11  | 0.794648929648909 | FALSE |
| 7dd5364869a72d25f903f2a7fdd10feb  | 11  | 0.794648929648909 | FALSE |
| 1a8d886228576ed91c68865e528df502  | 11  | 0.794648929648909 | FALSE |
| 7e910a4671368a87833508c5b7e64b5c  | 11  | 0.794648929648909 | FALSE |
| fe93a26042d60e3601d4b58c7ffc3a80  | 11  | 0.794648929648909 | FALSE |
| 36fa43c25ed6c2d07c29e03e2894c586  | 11  | 0.794648929648909 | FALSE |
| 2f6051215455021cba7fae075f514065  | 11  | 0.794648929648909 | FALSE |
| 88ad1024d096672da0ec59be76064479  | 11  | 0.794648929648909 | FALSE |
| c2815e98bbc9a5c26391b06e88536412  | 11  | 0.794648929648909 | FALSE |
| 34572a2307da886cbce2b191be5f213a  | 11  | 0.794648929648909 | FALSE |
| 2f36633f10f651dce4741ab9073fbc57  | 11  | 0.794648929648909 | FALSE |
| 859cd1dcd7e3525daa1e111756201de7  | 11  | 0.794648929648909 | FALSE |
| 72f332a962517e2081df0ebac4ce0e1a  | 11  | 0.794648929648909 | FALSE |
| 7aa55291042b0dc85bf66204aeecc5f3f | 11  | 0.794648929648909 | FALSE |
| 3fb2f665e9e58a2e7ad1fdd1ee77a271  | 11  | 0.794648929648909 | FALSE |
| 9a99c0b7962e2d34c24e789e2581217f  | 11  | 0.794648929648909 | FALSE |
| 3ec4481028596ce277448c7cb5385a74  | 207 | 0.796503292277668 | FALSE |
| 3da914834c78256cc61d1c1c470e4552  | 30  | 0.804048399611448 | FALSE |
| 045bb03f6292d0b36cd77c9e6c5c4020  | 30  | 0.804048399611448 | FALSE |
| 196a053b371610ff9ee00b66df0b4d35  | 12  | 0.810804914479843 | FALSE |
| cc351e8607640aefef66b8b1b35f44c   | 12  | 0.810804914479843 | FALSE |

|                                  |     |                   |       |
|----------------------------------|-----|-------------------|-------|
| 60f0a102e1b3118286adc774264b5b7d | 12  | 0.810804914479843 | FALSE |
| 88b3d853bf0ae026c108316bdbf7516d | 12  | 0.810804914479843 | FALSE |
| 88f8c0389e4c0872fbee3232eb0eb5d  | 12  | 0.810804914479843 | FALSE |
| c2c99e10b5956b9c6b87131faf3a9467 | 12  | 0.810804914479843 | FALSE |
| 1590cb24d34f240f939466c1bca211e1 | 12  | 0.810804914479843 | FALSE |
| 3678d89e46e36d2dc9cdd1a84955bdb4 | 12  | 0.810804914479843 | FALSE |
| a6ac3b4cd416b6f921f702db706730f4 | 12  | 0.810804914479843 | FALSE |
| 4d350a5bdf32548e11848a818277b8c2 | 12  | 0.810804914479843 | FALSE |
| 17473586f4b889c05139cc72c2e8062e | 12  | 0.810804914479843 | FALSE |
| db4c8dc0512e585410924ee31218577b | 12  | 0.810804914479843 | FALSE |
| e556ee5150ea74092458189357186622 | 12  | 0.810804914479843 | FALSE |
| 305ab46bc50af8c9b04a52005224274f | 12  | 0.810804914479843 | FALSE |
| 6165cf874bd70cc64dd43f05eeef2264 | 12  | 0.810804914479843 | FALSE |
| 00a7b0037094adc4a8f638508824284b | 12  | 0.810804914479843 | FALSE |
| 958362b80eb527e5d99cfc14727a45a8 | 12  | 0.810804914479843 | FALSE |
| 32891522d68b23b9fbf71520146d04d  | 12  | 0.810804914479843 | FALSE |
| b7dafc10c238527a63f20df8257221eb | 12  | 0.810804914479843 | FALSE |
| 3be4093633164903309652a5ee96300f | 12  | 0.810804914479843 | FALSE |
| 0ac81f5b1143565c25fd8b8eb4206e8  | 12  | 0.810804914479843 | FALSE |
| 2d30c2c53fd94f63d88b136d45aca3b0 | 12  | 0.810804914479843 | FALSE |
| 0251c873b9e6e76973408b336adeb8b2 | 12  | 0.810804914479843 | FALSE |
| 43bafcbff59dcf1ac8758da64ef9b5bc | 31  | 0.816418212900771 | FALSE |
| 8d5e9411bb401bbf42175d0fd956d125 | 31  | 0.816418212900771 | FALSE |
| 3861ee62617a071584eabec1162b5126 | 31  | 0.816418212900771 | FALSE |
| 1b29cef84de6cbd9cd52eb9dbaa7fe7d | 31  | 0.816418212900771 | FALSE |
| 9b9a1ae38e23758a979eed98d5f06dc9 | 13  | 0.825720709603839 | FALSE |
| e7de984e21341b13ac754739096343b2 | 13  | 0.825720709603839 | FALSE |
| e95ab89ff87282bb7ebfb109bb235db9 | 13  | 0.825720709603839 | FALSE |
| 7a17d452d41caf71ea4de6188dff66e  | 13  | 0.825720709603839 | FALSE |
| a0f355228c2bc92f7151668f1fc71558 | 13  | 0.825720709603839 | FALSE |
| 581add769634c1bb41fe0eac84da9423 | 13  | 0.825720709603839 | FALSE |
| a6e12567a5a8ff604652fed640545653 | 13  | 0.825720709603839 | FALSE |
| 047c596149ab5e1e62eb9341525b0276 | 13  | 0.825720709603839 | FALSE |
| a8146cf9c7c06aec25a563142d473b10 | 13  | 0.825720709603839 | FALSE |
| 4b36eec432ef4ffb3464a8a0a9eafee3 | 13  | 0.825720709603839 | FALSE |
| 5d55c5aaab36a98540bcd71cf23696b1 | 13  | 0.825720709603839 | FALSE |
| c606ef358bc6506aca4c4b89cc56e45e | 13  | 0.825720709603839 | FALSE |
| 6fdb0a43d61c08d2d4e244d97a48e9f2 | 13  | 0.825720709603839 | FALSE |
| 91702465b934d02c76f76cfdabdf946  | 13  | 0.825720709603839 | FALSE |
| 997eb2712b5cb0cec6f883c8f2fb31b0 | 13  | 0.825720709603839 | FALSE |
| 92c64b7632c36c15c97dec4597f4f72  | 13  | 0.825720709603839 | FALSE |
| 475abf5e533ed261100a79ba2b5f8ec  | 13  | 0.825720709603839 | FALSE |
| 34c94d66644c9e3e641a5040c3113f72 | 13  | 0.825720709603839 | FALSE |
| a9266e9cb66778a8c6c548877d9e204b | 13  | 0.825720709603839 | FALSE |
| c3018532c596c385e1f4cd12b2d3fe8d | 13  | 0.825720709603839 | FALSE |
| 52dcfdea4e1a3fe11524ecdab8df475d | 13  | 0.825720709603839 | FALSE |
| 55166f0153519210b5f9ee37f47f518d | 13  | 0.825720709603839 | FALSE |
| 4f10e321d38c10ef2b7a144f41da7d91 | 13  | 0.825720709603839 | FALSE |
| edb6db65965a970c9eab814177f21796 | 13  | 0.825720709603839 | FALSE |
| be6838d85b6c9b7429f1f7f4879c1d28 | 13  | 0.825720709603839 | FALSE |
| f3325b6c39cd939584b540aa9894f1d5 | 13  | 0.825720709603839 | FALSE |
| e19ce815c8643b851715aba05acf960b | 72  | 0.835326575452095 | FALSE |
| 243efcb3cb4808110c65c8176347c6ea | 33  | 0.839105266188764 | FALSE |
| b98f8c87cd3159b66ec0a418919be624 | 14  | 0.839489135872143 | FALSE |
| 4d02c00f27d2b0369cae8697f8aa74e0 | 14  | 0.839489135872143 | FALSE |
| 804da4953d5a3c2dec62eceaafd77dbb | 14  | 0.839489135872143 | FALSE |
| e54de8f948e4f1d2a3c9e5a394c5bc37 | 14  | 0.839489135872143 | FALSE |
| 7c664e537af176112682a9792e06e757 | 14  | 0.839489135872143 | FALSE |
| dbb77ef1903ce7b239d6c65a83ad3f3  | 14  | 0.839489135872143 | FALSE |
| 7d8a38181893e5747a2b6c5a1be1b9d3 | 14  | 0.839489135872143 | FALSE |
| d9d7d7b8bf24da8102e83469458682bb | 14  | 0.839489135872143 | FALSE |
| 6f3994ea8e29e64aa02df14a2846a8f6 | 14  | 0.839489135872143 | FALSE |
| 5655eff59411150b46cf6f2d75b35308 | 14  | 0.839489135872143 | FALSE |
| f30cd40fb114ab501e51f2f8aa202e14 | 14  | 0.839489135872143 | FALSE |
| b5df6b3e09aba5b4c07aaa7690198885 | 14  | 0.839489135872143 | FALSE |
| 670ab9f3126df45d2280c6d68eb6724d | 14  | 0.839489135872143 | FALSE |
| 61e1d16b27c60bdf7b9d4a61877b777  | 14  | 0.839489135872143 | FALSE |
| 46bd431314d551a4394037b4b0e5f9da | 14  | 0.839489135872143 | FALSE |
| 18430608bf7e39c8866f4592dae12694 | 14  | 0.839489135872143 | FALSE |
| 8f2f800e4a8e5c41bed76dbcb81203b8 | 14  | 0.839489135872143 | FALSE |
| d5a541cd845afa61ac26e362a9368819 | 14  | 0.839489135872143 | FALSE |
| 6b32fa82cd34029494b5351fe148c7f7 | 146 | 0.843871452255949 | FALSE |
| ff4ae0f811e8dcb2d76d7d8acc73deb8 | 132 | 0.844381485294231 | FALSE |
| 23d922f2b3e9315c90bb4189ba7f7f52 | 34  | 0.849484318274827 | FALSE |
| 621a423823ae9010632f322b6172946f | 34  | 0.849484318274827 | FALSE |
| 6b11f2c5e75502f47952b01f902ce16  | 15  | 0.852196245948932 | FALSE |
| aa806b10a642f7016ecf85fa68d73b48 | 15  | 0.852196245948932 | FALSE |
| 255e84a7816e3f4f5e5c82c5b086195d | 15  | 0.852196245948932 | FALSE |
| ba9601da497863819d4758229b591e4c | 15  | 0.852196245948932 | FALSE |
| 2c894c9e3a032a9824774aed6a96603d | 15  | 0.852196245948932 | FALSE |
| 8d9f970561fe1a7c174364c656380fe2 | 15  | 0.852196245948932 | FALSE |
| 2bab1b7d627ef1fb38400f422073d46e | 15  | 0.852196245948932 | FALSE |

|                                   |     |                   |       |
|-----------------------------------|-----|-------------------|-------|
| ccd93a6f7c86fa38459587813126e9fe  | 15  | 0.852196245948932 | FALSE |
| 15b8ef9c8fd1c209fe10fe79b57a36f4  | 15  | 0.852196245948932 | FALSE |
| 7cf993146775b44a6b8f89833e71508b  | 15  | 0.852196245948932 | FALSE |
| 8d4b1c33aee9458da55ed0181ca9b8e3  | 15  | 0.852196245948932 | FALSE |
| 882f7684e960b257722e753254c34447  | 15  | 0.852196245948932 | FALSE |
| 465a1ce875ea713594915ac415e88ab9  | 15  | 0.852196245948932 | FALSE |
| ece50a62168f85fc61385d8adb4c6494  | 15  | 0.852196245948932 | FALSE |
| 8a185c2d22cabacd694587e629c5e53   | 15  | 0.852196245948932 | FALSE |
| 6b952a73de08f9fe604db1f30be44133  | 15  | 0.852196245948932 | FALSE |
| 7227f56c77a1a528f4eaa76c94e2004d  | 15  | 0.852196245948932 | FALSE |
| 4eb188c973c9d35a8ee1c68a9adb9a42  | 15  | 0.852196245948932 | FALSE |
| a2d516468a24a0b51943203260a1e7fe  | 52  | 0.858720990665559 | FALSE |
| ca79aa0ff5c0f05327203d05dc798f8f  | 35  | 0.859260460867701 | FALSE |
| e85924823aec7bd0bf33576e477e9902  | 16  | 0.863921804725426 | FALSE |
| 0e5ef2615e277c7143361c56e09c0b6f  | 16  | 0.863921804725426 | FALSE |
| f33a119e73a383eef2ba3f02c6a134de  | 16  | 0.863921804725426 | FALSE |
| 65d47248136b94e72d9aa1fb5392b608  | 16  | 0.863921804725426 | FALSE |
| 0bf4f18b63b6282536d07bb07e9a993f  | 16  | 0.863921804725426 | FALSE |
| 82ac56ca828692be621d100e94a3d6ff  | 16  | 0.863921804725426 | FALSE |
| d0ee179b720c3f1df4b1b44f35471a75  | 16  | 0.863921804725426 | FALSE |
| a29e586ce34cb2edac8c292267d77ad2  | 16  | 0.863921804725426 | FALSE |
| b8a62348b7c542b4e7f94bf0ccb486d6  | 16  | 0.863921804725426 | FALSE |
| 5160cc9e58946a0a4337b33b6533d3d   | 16  | 0.863921804725426 | FALSE |
| 88f0846ea1250a0029afd9f77ba0e5d   | 16  | 0.863921804725426 | FALSE |
| 97d4e9ea1f067927134c5a34f0d5ad06  | 16  | 0.863921804725426 | FALSE |
| a5b07cf8520236c817752cdai1c893a9c | 16  | 0.863921804725426 | FALSE |
| 368c8aaf10922a92b5d77aa9eb36a7c0  | 36  | 0.868462790609597 | FALSE |
| a9a8ba05b0fcdabd9ee1282d3076b726  | 36  | 0.868462790609597 | FALSE |
| 28b378e38018bbf0b0484af036ef1e5d  | 54  | 0.874611180745984 | FALSE |
| c8fb6ebbb3507d5257309f12e5e4f705  | 17  | 0.874739736567337 | FALSE |
| fcff23401e2280bde7682f18fa1d1cf7  | 17  | 0.874739736567337 | FALSE |
| 60cdf71a273a431942ece7f772dcb10   | 17  | 0.874739736567337 | FALSE |
| de4efdb3a52a4d915422b3bd60610041  | 17  | 0.874739736567337 | FALSE |
| 18c8488af7fada9ef923d6452aeb3a9d  | 17  | 0.874739736567337 | FALSE |
| df2dacf39bb2269336cd04a5fefdb119  | 17  | 0.874739736567337 | FALSE |
| c184aa75193f4e1f2a583a1fa827b3dc  | 17  | 0.874739736567337 | FALSE |
| 18b30b18da1d03ffe463fc69ef6441c2  | 17  | 0.874739736567337 | FALSE |
| 02e3c541b67c1f742460bbf565f63071  | 17  | 0.874739736567337 | FALSE |
| 1469f96bc2b17e99a7988e3fc891607d  | 17  | 0.874739736567337 | FALSE |
| 56b22d768a1396ed9e442d54a5ea4dbd  | 37  | 0.877119570694435 | FALSE |
| a4d01993784ebbe3fec3839448d1f52d  | 94  | 0.87993196455902  | FALSE |
| af41b8a7c03317c74926ead0fd35e8f   | 18  | 0.884718541620673 | FALSE |
| 73858fe4e97c180d5a7545f994a6a788  | 18  | 0.884718541620673 | FALSE |
| 7fb82c9bf8a0918e18e5fd25a3064d11  | 18  | 0.884718541620673 | FALSE |
| 2d95ca79269a5201b9100b5bb7f969c5  | 18  | 0.884718541620673 | FALSE |
| c3d3ad1283cfc17a3d466847de0f585c  | 18  | 0.884718541620673 | FALSE |
| 642e62255f6c842272cd37f56c189bb6  | 18  | 0.884718541620673 | FALSE |
| e90425a6fe76084e079af542f4bd2632  | 18  | 0.884718541620673 | FALSE |
| 6f34aeafa706c2a148d34d4b540db857  | 18  | 0.884718541620673 | FALSE |
| 2895e2dc704bf22b9ac315e117faef1e  | 18  | 0.884718541620673 | FALSE |
| 06957346beaf0bdf292900cf66ebdb6   | 18  | 0.884718541620673 | FALSE |
| 073718ac989b6696918a078173a59117  | 18  | 0.884718541620673 | FALSE |
| 43d98b132b922ada4a8b34d08dff7d38  | 18  | 0.884718541620673 | FALSE |
| 2d6f7915a01751f1ab279a4e17c15b8e  | 18  | 0.884718541620673 | FALSE |
| 8ac40970733480af91b7d4204a5ee421  | 18  | 0.884718541620673 | FALSE |
| 43f2b9bb3ec86a9c4b2322f3b1ca9660  | 18  | 0.884718541620673 | FALSE |
| 24513f3439ddfcae0170dad90ebce403b | 38  | 0.885258189454661 | FALSE |
| df45ff114fca650e2150e761e33d947f  | 56  | 0.888943713616188 | FALSE |
| e7929c7247681ff65b78376206017180  | 39  | 0.892905129428559 | FALSE |
| a48c86bb43aa39dce41597a3ff0a026f  | 19  | 0.893921683255998 | FALSE |
| 794184e730540cc7ff89c9e06d29a1d3  | 19  | 0.893921683255998 | FALSE |
| fe44c3d1e39fa07e328e63b858248557  | 19  | 0.893921683255998 | FALSE |
| 6c051d317e4e22c0ed7e6a0f1d665337  | 19  | 0.893921683255998 | FALSE |
| 8603c3db2bb660bfd3b8d633a4bd4c7a  | 19  | 0.893921683255998 | FALSE |
| fdf86a1fa9f0935a6512bd850d5997ea  | 19  | 0.893921683255998 | FALSE |
| 93708d53940a56f66653b13014c2652   | 19  | 0.893921683255998 | FALSE |
| 413bc036aa08e6c887c47488e63cfd7   | 19  | 0.893921683255998 | FALSE |
| b448d68001582a65eae812c8015a15d2  | 19  | 0.893921683255998 | FALSE |
| cff0ae11f6b5cd20ab0d14c2cb6f773c  | 19  | 0.893921683255998 | FALSE |
| a9d9e22d46fd432964b7e70ceac35fd0  | 65  | 0.894119310001397 | FALSE |
| 25089d3f7bed37ea7e764b89a1d2f4e0  | 40  | 0.900085945646662 | FALSE |
| cfdd70bdbf090e219bf771ede00b81bb  | 198 | 0.900672614915809 | FALSE |
| 56de38318fb195c98890d09d1fb9fd7   | 20  | 0.902407948595518 | FALSE |
| c3ecf8e6e7e7a856fbd2fd2d4ee56b36  | 20  | 0.902407948595518 | FALSE |
| 5797b86035ec7c8fa28465a07b9805f0  | 20  | 0.902407948595518 | FALSE |
| Oddcce08d53979d98bc25c7d02ae7f8   | 20  | 0.902407948595518 | FALSE |
| f64861919bd8bf28858e81c625781fc2  | 20  | 0.902407948595518 | FALSE |
| 46f6ee1a78f2fa98ad1e29c553d32636  | 20  | 0.902407948595518 | FALSE |
| 1276c14169f9d464cdb5471ea52e902d  | 20  | 0.902407948595518 | FALSE |
| ffb2d29ff42e4c25a31714e0b6c2dca   | 41  | 0.906825251993826 | FALSE |
| 5f3673305f1d86e0ddbfa1ed980368b7  | 41  | 0.906825251993826 | FALSE |
| 4119e9aeb272d4ff8f0af3a026865785  | 59  | 0.907777302682907 | FALSE |

|                                   |     |                   |       |
|-----------------------------------|-----|-------------------|-------|
| 8db9ec3c6c2da03db22d64f72b6f0c7d  | 21  | 0.910231783940181 | FALSE |
| 6ac028dc5e7f0066b35194e99b072aa8  | 21  | 0.910231783940181 | FALSE |
| a1bed12a320d811c7025e11b4aa933ec  | 21  | 0.910231783940181 | FALSE |
| d0e7ee826a8a40ab80d2bcc61ab571f5  | 21  | 0.910231783940181 | FALSE |
| 0a1561a33d1b52b9b8846598ed4ca557  | 21  | 0.910231783940181 | FALSE |
| 8fd632a60760954f8497f1fc8a51f4b3  | 21  | 0.910231783940181 | FALSE |
| 219122904013b99064a9d2cf96b0106d  | 21  | 0.910231783940181 | FALSE |
| f48e415e85476e0bc78c073767ad7196  | 21  | 0.910231783940181 | FALSE |
| ad460170fa30ba7e8f74c918c6fbb3b9  | 21  | 0.910231783940181 | FALSE |
| eb19b3f753e323f3d3d73a77b517e46e  | 21  | 0.910231783940181 | FALSE |
| ee4b74373fc0cece03796e5db2aa3d3a  | 21  | 0.910231783940181 | FALSE |
| 2cab47f2bc2f1bdaefbd331f3a490414  | 21  | 0.910231783940181 | FALSE |
| 63355ac2e4dd546d908aa62e078e814b  | 22  | 0.917443606794881 | FALSE |
| c324721a2dc34076ead3590c735a6779  | 22  | 0.917443606794881 | FALSE |
| af8c2f69e1dece5ad3a2f23731ae5420  | 22  | 0.917443606794881 | FALSE |
| aea976fc75991164def44c3dc183bb16  | 22  | 0.917443606794881 | FALSE |
| cd9caf8d961e5c6a16348abd971aea04  | 22  | 0.917443606794881 | FALSE |
| a5189f77a2cfeab3bc1602ff5c8ac3e9  | 492 | 0.923076923076923 | FALSE |
| 31f23810ce7087481ef862d15d9fd041  | 23  | 0.924090096078344 | FALSE |
| 3d535665aaae9491f84783ece3dd889   | 23  | 0.924090096078344 | FALSE |
| 03b3b240d243a28811ea34a257d4bd6   | 23  | 0.924090096078344 | FALSE |
| 5cda16c50b985a14e0ec9910e3726133  | 23  | 0.924090096078344 | FALSE |
| ec23b923e536e0a2279f4c973531e122  | 23  | 0.924090096078344 | FALSE |
| e952ac57af197a320c22ecec62384fc   | 23  | 0.924090096078344 | FALSE |
| 88da24edb3fb401aa506d44503445f2d  | 23  | 0.924090096078344 | FALSE |
| 2d834dae498cec30f6b9043cf2910a9d  | 23  | 0.924090096078344 | FALSE |
| 752353b9793ab0e9cd4dab60c7b72860  | 23  | 0.924090096078344 | FALSE |
| bb00e9f32a7ad532a6c3ed50dcb3d251  | 23  | 0.924090096078344 | FALSE |
| 1afda3ce15867b1740804995147a56d1  | 23  | 0.924090096078344 | FALSE |
| 94202d625126dcb1729abbd7d7018a9   | 23  | 0.924090096078344 | FALSE |
| cfa03a7d8244ddf2a84841f464810ed5  | 23  | 0.924090096078344 | FALSE |
| a67f1c0453dc4e295b206418d36b1f6   | 44  | 0.92462603707359  | FALSE |
| 19b699fcf40dfdeb5ed8ace52f4f2dc8  | 44  | 0.92462603707359  | FALSE |
| d1566cbf914a151f452e881fc9cae2e6  | 88  | 0.92543879210039  | FALSE |
| df72998479c8b1228c5c3943f047680b  | 177 | 0.926350766924639 | FALSE |
| bba4e5e8793fe193ffacb3e7a66c9f29  | 63  | 0.928502518965154 | FALSE |
| 025f3ec3dafc2f35bc840c5669bccaff  | 63  | 0.928502518965154 | FALSE |
| 15d1ae7f19a3b5bc4667544bde11d38   | 45  | 0.929826511957183 | FALSE |
| 4cf3fce832b0e75aa582596e5159e808  | 24  | 0.930214461999836 | FALSE |
| 5df57ffc227fabd2e10b3d6652ccc022  | 24  | 0.930214461999836 | FALSE |
| 1c6fdc27b561532077e6d9e80823a7fa  | 24  | 0.930214461999836 | FALSE |
| e1b3da5566b52686c72b1c8b37d79ab9  | 24  | 0.930214461999836 | FALSE |
| 3db627cc5e513aef2a1a4690e49e095f  | 24  | 0.930214461999836 | FALSE |
| 54f785fd2739fa4cdf5fac6da3ebfe4b  | 24  | 0.930214461999836 | FALSE |
| 22be50f25335287f88a3b9c75961865b  | 24  | 0.930214461999836 | FALSE |
| 1c0b93dba78bead886310532c780520c  | 24  | 0.930214461999836 | FALSE |
| 4bf24b715c0092ecec6c83803f8f80c   | 24  | 0.930214461999836 | FALSE |
| bc880c65f6166950172bc6317df770e3  | 24  | 0.930214461999836 | FALSE |
| c652553c5dcf87deed14605ad770aef4  | 24  | 0.930214461999836 | FALSE |
| deba196a20f64e12587b394034745e35  | 24  | 0.930214461999836 | FALSE |
| 70f27b663b51acdefb4c6e059612bcc5  | 24  | 0.930214461999836 | FALSE |
| f248f33104991f8f21e7cd8053710b68  | 73  | 0.930864893815069 | FALSE |
| 28bd824140d5c67d97ab2272d1014303  | 74  | 0.934524190979015 | FALSE |
| 0e22b2e49a15e74e09bf1c151ed0f16a  | 46  | 0.934694395790298 | FALSE |
| f8becf0c50c828245f68b0f69562ad0b  | 25  | 0.935856696987084 | FALSE |
| e3e402965331906831146281f74a361c  | 25  | 0.935856696987084 | FALSE |
| 96716aeeb18233697ce5131e6a0e778a  | 25  | 0.935856696987084 | FALSE |
| 077e11092881c0e616329dbdb02051ea  | 25  | 0.935856696987084 | FALSE |
| 76ecf45f639b721f6645c142b25991b9  | 47  | 0.939248703899328 | FALSE |
| 5ee5bf5ebc1547aea9d338e88b0b7c3b  | 47  | 0.939248703899328 | FALSE |
| 642567877ebcb1fc9c9b26a7ea85fbc3  | 26  | 0.941053808958279 | FALSE |
| 7acfbffd36ba9fa46063bf2688c97afa  | 26  | 0.941053808958279 | FALSE |
| bae9e2ba2c9f33c59e2c4d6127de0a3a  | 26  | 0.941053808958279 | FALSE |
| e48e37a0467ce3d2ff2c3a0f1167497b  | 26  | 0.941053808958279 | FALSE |
| 2c22a0fda496e652c971a6cfece88ec26 | 26  | 0.941053808958279 | FALSE |
| 8b1f185c948b07011f747c2da9878f91  | 125 | 0.945011945405258 | FALSE |
| 75d434e8cbac96a34057771b55101151  | 27  | 0.945840038145428 | FALSE |
| 16458c9597c205072815592a80ecdc7c5 | 27  | 0.945840038145428 | FALSE |
| b3bd84d7babbb68dbd7a1528593265c4  | 27  | 0.945840038145428 | FALSE |
| 70f04406961b7b38ab74ba06cac3c090  | 27  | 0.945840038145428 | FALSE |
| 933bef6fc914f6f30ce2edd6cb048102  | 27  | 0.945840038145428 | FALSE |
| d4dc3f83e8ada91f63124bd347103ae9  | 28  | 0.950247058596121 | FALSE |
| 5a4eda6fcd6ab834dba0111f5e5d95    | 28  | 0.950247058596121 | FALSE |
| 1a5c35a922fd259929f1379e9fc89fe9  | 28  | 0.950247058596121 | FALSE |
| 61324ada608d3a8fc4f97057a7acd186  | 28  | 0.950247058596121 | FALSE |
| 4bb0efcbe14db9a98578c065540b3ce0  | 28  | 0.950247058596121 | FALSE |
| d453b2abebc22f909d8e87353f4d03ad  | 28  | 0.950247058596121 | FALSE |
| c33766d386623db8e71db4e9d44a2f8b  | 28  | 0.950247058596121 | FALSE |
| a1b5c85117491a6fee703b82718600c6  | 28  | 0.950247058596121 | FALSE |
| 6cd8021d0df25c00c8f825e988b87b40  | 79  | 0.950296797263479 | FALSE |
| 6091b6f3a98a65dea5b6add6b3b7d887  | 50  | 0.951207180480497 | FALSE |
| a73619885909abe32871924ea8d5573d  | 50  | 0.951207180480497 | FALSE |



|                                   |     |                   |       |
|-----------------------------------|-----|-------------------|-------|
| 8e7e470f27ee9dee24fe1063312db221  | 50  | 0.951207180480497 | FALSE |
| 70aa5a01ed7683fd122c10659d43706b  | 80  | 0.952997495063912 | FALSE |
| 1a95e5b78913fedee75e1f052399e016  | 80  | 0.952997495063912 | FALSE |
| 9ba80d636e5561c9a76f1aa0f67b5b4f  | 128 | 0.953018111878516 | FALSE |
| dab9247c26155029ce7821e765ebc155  | 29  | 0.954304165405879 | FALSE |
| 89c4dd7f04661867c45fbd395b3fcee   | 29  | 0.954304165405879 | FALSE |
| 480a9d52f57963fd090a9d94ee44681   | 51  | 0.954679968359587 | FALSE |
| 07bf7669e42ebc17a676ae314133677b  | 114 | 0.956449115914962 | FALSE |
| c7985a28aa4cf9627133974bee02eb07  | 30  | 0.958038448663033 | FALSE |
| c4bff0ab73cc7a0273cee68fc49e24    | 30  | 0.958038448663033 | FALSE |
| e27680d4009f98f30248d823bc17fb8e  | 481 | 0.958468877945874 | FALSE |
| e71f2cd748d4be5bf9412164728834c2  | 65  | 0.95978801932764  | FALSE |
| 8d278be881c77f270f9250ee0f55ff8a  | 437 | 0.960667235356931 | FALSE |
| 8ba130bd59fb89ff9f115561c5945f96  | 53  | 0.960945634967021 | FALSE |
| c88aa34a8ddb9b4f44cd46b7ca1ebdd4  | 31  | 0.961474955022526 | FALSE |
| a2d411fff3a418ad531287e0f24eb090  | 31  | 0.961474955022526 | FALSE |
| fbdd0ce9feb0e5bc7494354ad9296b92  | 31  | 0.961474955022526 | FALSE |
| d684d6466b2c6e9ac91ecc13f105b1c4  | 31  | 0.961474955022526 | FALSE |
| c0a5a04e7e5773e91892d4c41ab7e0cb  | 84  | 0.962505104355992 | FALSE |
| 2d983b4684cc85598f7454c72b58eb26  | 54  | 0.963765892214911 | FALSE |
| 9a2dc4f076b397af87aa6a5cf4404d41  | 133 | 0.96413379708232  | FALSE |
| c5803199ff4c3da81551b3b5223ec5e7  | 67  | 0.964214349147749 | FALSE |
| b519b2fa0b4b23dbc16576634c819d16  | 67  | 0.964214349147749 | FALSE |
| 9bee9198d6fd38b817cf2f3a7b118763  | 67  | 0.964214349147749 | FALSE |
| 23951d86554a06257abfffe1b4bcd8f   | 85  | 0.964587351118251 | FALSE |
| ac181dd33b4fc009cce071af5f0d21c0  | 32  | 0.964636837763658 | FALSE |
| e9fac19935b286ddf2a78075e7017977  | 32  | 0.964636837763658 | FALSE |
| 3d8c220d0ff87025f87b4955bce98e2b  | 55  | 0.966394818614568 | FALSE |
| 664ba36a3ef364511b4b5865f662ea58  | 33  | 0.967545496129418 | FALSE |
| 40569c7ad9644afad194ec2f0c31d157  | 33  | 0.967545496129418 | FALSE |
| 38c2834f2d440309fa6dd0bdce32ed78  | 33  | 0.967545496129418 | FALSE |
| b05bfcc2ed94261623c92866941caae4  | 33  | 0.967545496129418 | FALSE |
| 8c29c0ac4bed029ebbeb22b3935cc8bb  | 69  | 0.968175996315455 | FALSE |
| b28ed22c1484414affbb2110e2cb8dd0  | 70  | 0.969997389487643 | FALSE |
| 73df01709999f4490d3dcd729cb9665f  | 88  | 0.970211815168778 | FALSE |
| 502d89eeb4d74d570458302627aa1beb  | 88  | 0.970211815168778 | FALSE |
| 19b611714457a10b79396b8ee7dfbba5  | 34  | 0.970220704691418 | FALSE |
| 34e6dd3019805dcef9989972c300b776  | 34  | 0.970220704691418 | FALSE |
| 6a316c83cc725ab296f381e1977fcc84  | 34  | 0.970220704691418 | FALSE |
| e8760ab74d8bf916e7b9e6742d3fb1fd  | 34  | 0.970220704691418 | FALSE |
| 840600f831582858ed2ae3964571e4e7  | 34  | 0.970220704691418 | FALSE |
| 05a9bdb05e34d5848bf5144f0e58419b  | 380 | 0.971009992641975 | FALSE |
| 57d52f46acd5562d4edee17e354f9cc6  | 57  | 0.971125753566493 | FALSE |
| d3247c936f8f4735909a8526ebf2f49e  | 391 | 0.971435119747249 | FALSE |
| ae4ab154cb983f0fccdc4377469417cd  | 35  | 0.972680733434301 | FALSE |
| b2bbfa9e2ea7dfdeb3807096c69b1e9a  | 35  | 0.972680733434301 | FALSE |
| fd1c43ccf4c93ee1cd46c142e1485689  | 35  | 0.972680733434301 | FALSE |
| 8c623c0f9544735a038e1d30d2b51fa2  | 35  | 0.972680733434301 | FALSE |
| d4f532a400b5a2e27e030558ec7e3a10  | 35  | 0.972680733434301 | FALSE |
| ace63ae9de78bed2e5510a38c85812f1  | 35  | 0.972680733434301 | FALSE |
| 4c06188bc9c7b91eec9e1fe25da00706  | 312 | 0.972895070666662 | FALSE |
| fc94161516cf5edaeb8c984c59c9ab21  | 73  | 0.974888026979453 | FALSE |
| 7ce80a763e15761f1fe86ef8581f826a  | 36  | 0.974942459206624 | FALSE |
| a347935cc17b25761d608e0a04fa70ef  | 91  | 0.975001953706185 | FALSE |
| ca461f4b5e8bd616a405daf9f2ae0f20  | 59  | 0.975226221953246 | FALSE |
| d6be45afca6371cdd7d012d8ce94ebd8  | 108 | 0.97523648938085  | FALSE |
| ba673c958da8e9385196463c6ef87a4a  | 140 | 0.97582220885328  | FALSE |
| fa5757ea2e0bd2ada15a5592ae37c723  | 37  | 0.977021469141446 | FALSE |
| 51700328b249bef1561f6d7115121c77  | 37  | 0.977021469141446 | FALSE |
| 52f7717d7d4b29e0a22c4e08ed966ea3  | 37  | 0.977021469141446 | FALSE |
| 48cd0867fbc39c565a7343262fa9585e  | 37  | 0.977021469141446 | FALSE |
| e3aa1e69ab25c04321fca9f0996fb994  | 37  | 0.977021469141446 | FALSE |
| 446d2c96ce6aaa50144d2da771ef8863  | 37  | 0.977021469141446 | FALSE |
| e8e69f28dc2939bc04a1690ab27bd4bc  | 75  | 0.977718738157169 | FALSE |
| 9dfd78e79bba89ffe82035671fd61f9d  | 61  | 0.97877442548296  | FALSE |
| 60de5a18f62043a523b08ecc4e10a441  | 61  | 0.97877442548296  | FALSE |
| 0fb527bad6c2916e89a972cf6eaf8a42  | 279 | 0.978835312501384 | FALSE |
| 48957f322815bd853ff040b697d46043  | 38  | 0.978932156608897 | FALSE |
| 1320f4cb4f2f04a8f6c7709b994b937b  | 38  | 0.978932156608897 | FALSE |
| ad65b63c122ba12caca48384f0f34ddf  | 38  | 0.978932156608897 | FALSE |
| 28323331d787c7344fc7407d7e26effc  | 38  | 0.978932156608897 | FALSE |
| 8134209f8d6001f476f316447084e099  | 77  | 0.980246285334548 | FALSE |
| f9ff9d5eb1c59d26a9689d1b617eba2b  | 62  | 0.980363455186265 | FALSE |
| 66e6cf9c166194e84fdcf94637ce3bfe  | 39  | 0.980687810224822 | FALSE |
| 897b61e5d2dce1bf89fedb73ed0eca90  | 39  | 0.980687810224822 | FALSE |
| 45a68a9eee3c83e27f4ea309d57ffc3   | 39  | 0.980687810224822 | FALSE |
| 3b150d94f8782944249fd0a73999227e  | 39  | 0.980687810224822 | FALSE |
| 5a8154c58ba9ea7bdadbccff21b3a3e6a | 144 | 0.980868578285112 | FALSE |
| 8d16916dcdaa69cee304e39539b62bec  | 40  | 0.982300696403848 | FALSE |
| ae6ea074d9cd8ec6896004a16d81702b  | 40  | 0.982300696403848 | FALSE |
| 0345b451b2a01dbc32e694d5310d02aa  | 97  | 0.982522440946451 | FALSE |
| 501dd344beeb7c69607fa1ffdf9cddf   | 41  | 0.983782135911896 | FALSE |

|                                   |     |                    |       |
|-----------------------------------|-----|--------------------|-------|
| d70bd64edc0672b74dee70fad8437752  | 81  | 0.984512697502304  | FALSE |
| c224c0288f2ed4a3bc2220986cad1932  | 42  | 0.985142574842024  | FALSE |
| 6d43cac09b0feb5f95abf46b0080739   | 149 | 0.985852356254384  | FALSE |
| 5f7b1039e8789ade0b68ff96715ebdc1  | 43  | 0.986391650408402  | FALSE |
| 8cbc77e3bd6a3cadc92289ed7497eb49  | 43  | 0.986391650408402  | FALSE |
| 7020e0243ea7e1d11d3eb43591f550f   | 43  | 0.986391650408402  | FALSE |
| 15b888fac2a8be4df2917b6670dad73f  | 235 | 0.986912054992386  | FALSE |
| 53dc126c6dcdbed4cdd3e2bc29bcb2f5  | 84  | 0.98712561921398   | FALSE |
| 4cd36df6046c25842ef887d47e7b023   | 44  | 0.987538251926098  | FALSE |
| 67acdf1a08a501e960ccc83a5c62c9    | 44  | 0.987538251926098  | FALSE |
| b08ef9b722e924b7d7758709ea999bac  | 85  | 0.987900140202004  | FALSE |
| 2e94d4dfa19d8774d333b853caff60    | 66  | 0.988438983428952  | FALSE |
| 0339d50219c71731139f9ce51ded15c6  | 66  | 0.988438983428952  | FALSE |
| 3ac305e8c1b4c9ea90f35d8600f8b8d6  | 45  | 0.988590577319005  | FALSE |
| 830c3ea3526c42f09986097a09800338  | 104 | 0.988632991898301  | FALSE |
| 1e8a8c7842c164cb6f6c6029625e902c  | 67  | 0.989132559179371  | FALSE |
| f924b59e41bdb872246acf7db5361fc2  | 67  | 0.989132559179371  | FALSE |
| d3640519d63b009a839d93bb86a6bb29  | 87  | 0.98931962583368   | FALSE |
| 6b72125ffdc5c3d74a239456bb6ea404  | 105 | 0.989322858710674  | FALSE |
| 8643001f205ade41838a964499d97b8   | 169 | 0.989648763831626  | FALSE |
| e2f82f601e2f4d6f8cc9001faa84d7e2  | 88  | 0.989969187801586  | FALSE |
| bd23f3464dbe38f2352549d726766d1   | 88  | 0.989969187801586  | FALSE |
| fb9868c77db10fc39a0129cde8a6d9b7  | 88  | 0.989969187801586  | FALSE |
| 52433c56fb7fbc1f94822c88618b92f   | 69  | 0.9904022919856229 | FALSE |
| 8dddef875ae1fd71b2f55cee552f56e9  | 47  | 0.990442044742412  | FALSE |
| d2b22a6509e29fd8d160f8af18373fb7  | 47  | 0.990442044742412  | FALSE |
| b86810a3acc42fe737e424e186df83f3  | 47  | 0.990442044742412  | FALSE |
| f3b9cecc06cf0c99e801d491b67de2cc  | 89  | 0.990581499379893  | FALSE |
| 60efc1e5aaedaa4974a098acf1a85a2b  | 124 | 0.990649125722333  | FALSE |
| 8f98fb8693ed59c21399d83ce2d10724  | 156 | 0.990888861088775  | FALSE |
| 62bcf76a05df8d7152251dc1abacc559  | 70  | 0.990982774941752  | FALSE |
| a54623313df876441f6bd6ea22292102  | 48  | 0.991254577851558  | FALSE |
| 4fb4479ec3e40df5abc4b828e8a43e85  | 48  | 0.991254577851558  | FALSE |
| dd8f8921af5ba9b0e334e9b08aaf18    | 48  | 0.991254577851558  | FALSE |
| 8af0ba30611d668e5a3927f85542f627  | 109 | 0.991712936225779  | FALSE |
| a86b3fc7197f2a1363443bf2934eff4c  | 109 | 0.991712936225779  | FALSE |
| 55af53a70bb5d746e81b9ce3713a110f  | 49  | 0.991999703505461  | FALSE |
| 2448d5a801ab0985c09a7c265d15308d  | 49  | 0.991999703505461  | FALSE |
| e27762562e5f097f5dd5d3ddaade6200  | 110 | 0.99222751881737   | FALSE |
| 5d564d5db4ddb67c61b7f7dbffbe15d3  | 127 | 0.992284862432369  | FALSE |
| 1ff5d9c73c320602c29d8f6f67907114  | 73  | 0.992530200713038  | FALSE |
| 4ade57e5bf1dea163c998a806258ee84  | 50  | 0.992682874891512  | FALSE |
| b4204990d266b67c13e644d5e2e3be91  | 50  | 0.992682874891512  | FALSE |
| dd4411cbe45e5040a3a75c1c10cfa747  | 74  | 0.992987246573161  | FALSE |
| c991e7b4a3dee5ea8515b854f6631824  | 74  | 0.992987246573161  | FALSE |
| 9e821a0ea32dc0a79c624893fa1742aa  | 145 | 0.993189977710979  | FALSE |
| b121a17a2f7b359de8888212613f319c  | 129 | 0.993225110763305  | FALSE |
| a75fdbd0512a2e0b09b67946674ea28e  | 51  | 0.993309115328724  | FALSE |
| 3ff22a19150bb5bb3fac504b21dd1e34  | 51  | 0.993309115328724  | FALSE |
| 1860bcc07a862435fe3fc78797201dad  | 51  | 0.993309115328724  | FALSE |
| 573610ba002103484c779191832a6c9f  | 76  | 0.99382283300343   | FALSE |
| 51e441cbdcc80da0656e82293ae160b5  | 52  | 0.993883051259895  | FALSE |
| 96a4b5621edd6a80e9bd93ec87b70e47  | 96  | 0.993981542524009  | FALSE |
| e7610857aa92ccaca28d9abdee16c246  | 53  | 0.994408942780537  | FALSE |
| 2987f11421aba677b3ed1ba21faf8907  | 53  | 0.994408942780537  | FALSE |
| b63b4aff4d8c479995ebbb5c206efcc5  | 53  | 0.994408942780537  | FALSE |
| c45aec1dff493b3b3a92b769c3527575  | 53  | 0.994408942780537  | FALSE |
| e5698bbcc0af657f3e43c3fbce8f55c7  | 53  | 0.994408942780537  | FALSE |
| 731043e4dbf3a367cdaae8b91bddbfe   | 55  | 0.995331968584332  | FALSE |
| 47eac9c2676422e360170281752eba7   | 55  | 0.995331968584332  | FALSE |
| f033e2deaafb6fd1525fc91a4d76a8b1f | 100 | 0.995366986351095  | FALSE |
| 5a722836ab0e0124d64413717949ade4  | 81  | 0.995518134373802  | FALSE |
| 686b1c1752a35be01421dfdacfa244e1  | 101 | 0.995663257771153  | FALSE |
| b1164c7556428ca28a0fa47436b70504  | 56  | 0.995736035085005  | FALSE |
| d5a1283783f4f7170bdef0cd036ee48f  | 56  | 0.995736035085005  | FALSE |
| ff7520f4d531ff12bb529c5403dbce5f  | 82  | 0.995799422473728  | FALSE |
| 9ad50086ebb6725181556774a235e206  | 102 | 0.995941708331355  | FALSE |
| 74f929cfd22b1eae037d866281cfc63   | 83  | 0.996063945953789  | FALSE |
| 118ec7a179026c54887b0f117b8270b8  | 83  | 0.996063945953789  | FALSE |
| a9b2c08281a57e2decf34d0892ba7947  | 83  | 0.996063945953789  | FALSE |
| a3d81bc3894304b7c0a6df55297a8d08  | 57  | 0.99610596811416   | FALSE |
| 37ffc50b19370c0b659f4c3d919f99e8  | 57  | 0.99610596811416   | FALSE |
| 9dfda2206e7dccc1438c2594ff36f4b94 | 57  | 0.99610596811416   | FALSE |
| 96bf4520c8e056750f57133a13ed76dd  | 57  | 0.99610596811416   | FALSE |
| cacfa81f2bc89116d93fe225248244da  | 85  | 0.996546457471862  | FALSE |
| 5aa73bdfc0eca9a7c83f64620d8828f4  | 59  | 0.996754455673928  | FALSE |
| 4f27892b2ff94c7f0d0cf982f27d8541  | 86  | 0.996766197016136  | FALSE |
| 56fd8c08e9e106325cabe0a193e11914  | 106 | 0.996896639309482  | FALSE |
| 58238c3d1af33f7a1e7c6769b3870a66  | 60  | 0.997037974488619  | FALSE |
| a1c5c150d75a73a1e90ce9724214d0e3  | 61  | 0.997297322344454  | FALSE |
| 35e06063493e115e43f15cc0d438eab2  | 61  | 0.997297322344454  | FALSE |
| 53805a3bc578a46d9b8dcb1946e6d76   | 89  | 0.997348877863528  | FALSE |

|                                   |     |                   |       |
|-----------------------------------|-----|-------------------|-------|
| 1643fdafc7ede484acb8d727168ab741  | 189 | 0.997385663338198 | FALSE |
| e6fc000a27af86cd26973287af4e061c  | 109 | 0.997469994209178 | FALSE |
| 5276610a51db67a6a227a6a3b486efd0  | 90  | 0.997519988992907 | FALSE |
| 374a0952cc1222bfe7e3f87423eb96a9  | 62  | 0.997534508836165 | FALSE |
| 8b4400776aa5b6f0268025915d1bee5a  | 62  | 0.997534508836165 | FALSE |
| f4ff94f14b1feb5a48cc311c5c895ea0  | 62  | 0.997534508836165 | FALSE |
| a8350956db53b9cb8e376f9406f154e3  | 218 | 0.997537442777406 | FALSE |
| 9ee696aaabfe93f028faf08377028b06  | 110 | 0.997637937380995 | FALSE |
| 54e7b2139640ec28fbaf7f0491cad845  | 91  | 0.99768064271719  | FALSE |
| a26ea2de067690b7f7ed5e1d1efa4770  | 63  | 0.997751380744095 | FALSE |
| cb31828b8f23e5e0d3bec4436df5444c  | 111 | 0.997795403298972 | FALSE |
| 5323c6dd766d629cc750b0aab4aaf72   | 92  | 0.997831444998761 | FALSE |
| a3b72b215a67e3caf3e3db37446195a4  | 64  | 0.997949634878026 | FALSE |
| 138a326ebca05adbe3f688c7b3ae46b6  | 64  | 0.997949634878026 | FALSE |
| 09a077421a0f673d4a4ef0a0e3f7a913  | 64  | 0.997949634878026 | FALSE |
| 54f3fa8080e96ee8c48b77627ac0ae3a  | 114 | 0.998210893905748 | FALSE |
| d77a3cc416991d5d3767214641e5b2ca  | 95  | 0.99823031082286  | FALSE |
| 2a5837baf8baa50071f3e36a0ff46fe2  | 236 | 0.99827897279397  | FALSE |
| 0a4009eb300a0f2671383587d6d8401e  | 115 | 0.998332246750527 | FALSE |
| 1815dac9ba55db9afc80283229a98eb4  | 115 | 0.998332246750527 | FALSE |
| dbfde3e3bdbbc75dd679758dad4834b73 | 115 | 0.998332246750527 | FALSE |
| 05b920e10cddf14fb5b0f0b42237d3e3  | 96  | 0.998347123119959 | FALSE |
| 57c580b06ef43b527dce14437166ba0b  | 136 | 0.99869184496278  | FALSE |
| d226235298c561b8478e3e446da337    | 100 | 0.998745655854517 | FALSE |
| e9e8170bb8209aa94f8ec9a4718ffe6e  | 138 | 0.998870720871609 | FALSE |
| 698b4f5204ec0b08253a421ffd6bf57f  | 102 | 0.998909146884648 | FALSE |
| fc7d25194c7a7e800b5f7063a557582   | 102 | 0.998909146884648 | FALSE |
| e3beabd067252bb387cfe12787744633  | 121 | 0.998913223732208 | FALSE |
| bd2d39a2564b0ecc2f4e153d55d8fb7f  | 121 | 0.998913223732208 | FALSE |
| 4ad750cce3d83d64cabb192681982484  | 156 | 0.998990942515244 | FALSE |
| 366511529e7fcd4e72ba41ced9049d7b  | 140 | 0.999026645773671 | FALSE |
| bec577c7cb4088fbb5631dc6ca656132  | 124 | 0.999126678027944 | FALSE |
| 76e476e3f5080af8597b9ea02dea6b0e  | 160 | 0.999258361933329 | FALSE |
| 5ebafbc67cbf3c6e47caca9b43ce08ef  | 108 | 0.999287599053711 | FALSE |
| b5a4fee1a67d3818a8b8e8fbc9e19424  | 109 | 0.999337145076013 | FALSE |
| e7ea4dc0277b1a7a2abe593bdcd1d0ead | 110 | 0.999383439652355 | FALSE |
| c17057f15de467ed9c2c7a57817aa221  | 112 | 0.999467066146307 | FALSE |
| 9d63796fb581267f616c12eeaf801ec2  | 115 | 0.999572774925443 | FALSE |
| 2068bc70de0f52d80b3aeaa003321213  | 151 | 0.999582373188258 | FALSE |
| 4ddd7df6ea0439b9b350e9795d3df725  | 134 | 0.999588342208228 | FALSE |
| eb71a8778089c7404c228b317e38fef5  | 116 | 0.999603391690688 | FALSE |
| ea587b40e7bc63eadc37e63ec3ac249e  | 152 | 0.999614271499125 | FALSE |
| 7e2ee3da1211add21aedb397c0807d7   | 184 | 0.999626238308179 | FALSE |
| b2ea94f362ee35da22832eb8c68eb9dd  | 118 | 0.99965854857485  | FALSE |
| acecad0c65e14937a0c7d6c6cb5f43c3  | 137 | 0.999673892453825 | FALSE |
| c395ce96ac93ca3a6c81d07dbf85a94f  | 255 | 0.999684196681777 | FALSE |
| e6ba559878b76dfc9c3c35aad453efb6  | 157 | 0.999742452486147 | FALSE |
| e12ab73726e1064cf0896d411a38c0d4  | 140 | 0.999742581542467 | FALSE |
| 00ca181e6e6aba8dc69ca15436732300  | 140 | 0.999742581542467 | FALSE |
| d9749f8b3a9efd705cf66b9e6c2a8e6f  | 140 | 0.999742581542467 | FALSE |
| db8252bed6b71c5e2c7242fe02ce5b1   | 122 | 0.999747971981451 | FALSE |
| cda4e6f933bb3108ea3e92f9db411c00  | 479 | 0.999771789839331 | FALSE |
| bae67a3f8b760d01ac5d851c35de517e  | 142 | 0.999780578992592 | FALSE |
| b36b52b10a3708b8e5fbaac814ab0931  | 272 | 0.999798373786883 | FALSE |
| 947a3c66fd46a8560854dd1c0dade2f3  | 126 | 0.999815044263348 | FALSE |
| 5343298f6ab7d59eb55c114cfec8b1ab  | 126 | 0.999815044263348 | FALSE |
| 5b4f8b625d8fbb1268863be7dbc4db5d  | 161 | 0.999815098254206 | FALSE |
| 3b555d2d7a26e295bdbdc64f10220157  | 147 | 0.999853885653837 | FALSE |
| fe2f04ee87e40784f5104a15bec2058f  | 164 | 0.999856504232813 | FALSE |
| 60f2c9280ca556fd607cc51bedbbd8b6  | 148 | 0.99986547084978  | FALSE |
| da77cbea962a956691c9df99f91cccf   | 131 | 0.999875427733902 | FALSE |
| 61abd8a8fc64fc4ea6aa6bb33c056efd  | 166 | 0.999879113464545 | FALSE |
| 3cbaa88b2064dc5314799d9201534ec7  | 133 | 0.999893933187167 | FALSE |
| fa60ad5919ebdc9b39b18872718a2393  | 290 | 0.99989482601865  | FALSE |
| 0d36c8f594b37214b4b58f29e1721f83  | 412 | 0.999899452336954 | FALSE |
| c0e8688a1ac2878e2e6f62fe2a9304a0  | 134 | 0.999902186582871 | FALSE |
| 114a25e4cdc99c47c718434af3821ad4  | 135 | 0.999909834237843 | FALSE |
| e59dec1a8a7c223eec18dbac3621bfcd  | 154 | 0.999918812324862 | FALSE |
| a74d576891e4a308b4e08ab2a713bf5f  | 216 | 0.999922674573975 | FALSE |
| 7945bab9c10211ec6dc054af97441a7   | 190 | 0.999942767697508 | FALSE |
| 448df6a475edcccc5b389fe189f85fd5  | 147 | 0.999967158466949 | FALSE |
| 10036e06b250b7624c5b886014e3b2ec  | 147 | 0.999967158466949 | FALSE |
| 608e6548b1b4cbb6176c8f9c090991a5  | 440 | 0.999969856753885 | FALSE |
| b078843bd82f039e57f68ab3a5a39c1   | 265 | 0.99997139406525  | FALSE |
| 75dfd64719ae4652eac85de6f5bfe498  | 198 | 0.999973467632021 | FALSE |
| eb01a38d86dcf9d0cc9d44abaa152f4   | 213 | 0.999974597960593 | FALSE |
| 9cc12e6a4537bd55623ad90bf6b7084c  | 254 | 0.999976179830259 | FALSE |
| ef60643f599842862bffdb564c7148d   | 154 | 0.99998231804312  | FALSE |
| 02bab2db0a7782cf48dec72cbac4bb20  | 172 | 0.999983924849906 | FALSE |
| 67a8bfa400cf64467ae73d78ee9b825c  | 188 | 0.999984067773002 | FALSE |
| dfc9a1ff9b06e08d2132da15e61b3919  | 306 | 0.999985833424557 | FALSE |
| Ocfd5d23461f5a71d9628ac22ce590ac  | 295 | 0.99998649106477  | FALSE |

|                                   |     |                   |         |
|-----------------------------------|-----|-------------------|---------|
| 5285ebad4f31b3e14f431007008acc63  | 235 | 0.999989412777277 | FALSE   |
| 87cae47f30ea5a277a184645ac6c3b29  | 160 | 0.999989795870326 | FALSE   |
| d64d3900ff68de4ea004f18ba50c364   | 239 | 0.999993294835884 | FALSE   |
| a9a88c76960dfd5173b31ab28fe6828b  | 267 | 0.999995006944357 | FALSE   |
| 29353ed4af9cabb15cc3cc85a1f760a   | 215 | 0.999995510222954 | FALSE   |
| 4c60dd7ba506649272fa67651b05a2f7  | 170 | 0.999996086406941 | FALSE   |
| b756bd4eff15dc5da0d88f9c34f65398  | 293 | 0.99999629171413  | FALSE   |
| d32274e6eeffddfd841ee35b5ba8ea1f  | 245 | 0.999996712798885 | FALSE   |
| ae8c85dff97d56450e4e1e66c152ce85  | 271 | 0.999997027002998 | FALSE   |
| 883d7985f03c15e9a5868bf9e14107d0  | 174 | 0.999997374135758 | FALSE   |
| babe77fccd08d91c140f37209e4bb5a5  | 220 | 0.999997444468929 | FALSE   |
| 98679ce00beb048dfa099128eef70f21  | 175 | 0.99999762694986  | FALSE   |
| ad6f1612a5a7fdb80cf80a0402d48ee1  | 211 | 0.999998612465422 | FALSE   |
| b125cd368e6d851a7650f0a58795f5eb  | 181 | 0.99999872372356  | FALSE   |
| 7ca9c8834010100a0dd569f0b2b5666b  | 213 | 0.999998898059349 | FALSE   |
| 4cecd2478253cedd0dff65d35d7c434a  | 290 | 0.999998904915158 | FALSE   |
| a78fa572a60226d8150bfb0cf0fad652  | 241 | 0.999998942214219 | FALSE   |
| 0a93c58cbaf5e764041cab0ad3e79b08  | 258 | 0.999999380746795 | FALSE   |
| 50b47d356c39644171792954d17fce0b  | 188 | 0.999999398765722 | FALSE   |
| 14fb9695d2e95bd663ad9a51b4d06723  | 276 | 0.999999726560132 | FALSE   |
| b78823261d78f2495896a69a3949e005  | 310 | 0.999999728244397 | FALSE   |
| 773727ee7de31552dcf3f9609c18bdad  | 211 | 0.99999975236723  | FALSE   |
| 28c1c628392df6a901829cfd2359a460  | 278 | 0.999999797358187 | FALSE   |
| f3a9e69bd296dd5d39ffec544b36f25   | 398 | 0.99999988284644  | FALSE   |
| 669fa3f5bd7330211bc2d8d996a9e3e   | 220 | 0.999999919550495 | FALSE   |
| f5ef8bcbeee4753d8edc0b1d7e0aa499  | 206 | 0.999999926051858 | FALSE   |
| 2081e8a45b69df88f6b3a5c914871247  | 240 | 0.999999965205849 | FALSE   |
| fb6931fb710455a0e1c19b26af270255  | 227 | 0.999999968102121 | FALSE   |
| 5be8258fc43191236125bcc62765fdd9  | 293 | 0.999999982309437 | FALSE   |
| 8cb3f4e315069c9334d1c069b96e3eac  | 234 | 0.999999987948591 | FALSE   |
| b8ba8f7a8bade720e87ca59fc4ab7fdb  | 274 | 0.999999991073874 | FALSE   |
| 267d0f9a598522aa3ee4069277ea81bb  | 250 | 0.999999991988983 | FALSE   |
| 6ace15b44dc69780c4bf45ef07ca096d  | 241 | 0.999999995678932 | FALSE   |
| b704e320a56fc1af1835929a3b71b7e3  | 255 | 0.999999996325366 | FALSE   |
| 8114b1d0274e9e4bb6c91f6af1b8fac8  | 302 | 0.999999996590613 | FALSE   |
| 3568d370fba8e070545cb84b03b7a088  | 268 | 0.999999996698289 | FALSE   |
| a2daf95d820d43e97bb2f8f61e3baaff  | 280 | 0.999999996796675 | FALSE   |
| de2a368a837144ad6e7b6f4c176b742f  | 272 | 0.999999998303345 | FALSE   |
| fd75faef9721be5ba0e4a3704a1dedf   | 307 | 0.999999998724608 | FALSE   |
| ef54ef898867d22d2f65ebda83483ba1  | 331 | 0.999999999438227 | FALSE   |
| 74299b737604267727262b92dde7d1131 | 322 | 0.999999999534007 | FALSE   |
| 2eaa1e130174d468d3b94c4f900e6e    | 281 | 0.999999999671667 | FALSE   |
| e7142feb387f929ee101779e66677cb9  | 297 | 0.999999999874447 | FALSE   |
| a2613697e6d6cc02bc530fd192f06bc9  | 311 | 0.999999999940768 | FALSE   |
| 2f93e58b78f2842e83abd5fde37ad276  | 421 | 0.999999999980276 | FALSE   |
| 2545c00c4b7992fda321d40d29a8cab4  | 336 | 0.999999999984447 | FALSE   |
| e083e2f58987c5f8db5d4dd16ddde91f  | 364 | 0.999999999990278 | FALSE   |
| 5160485a724e51fcd3e4ebe658012aa8  | 416 | 0.999999999990541 | FALSE   |
| 9e1d3dc63682fe2097c4dfa8dec76e9b  | 344 | 0.999999999999885 | FALSE   |
| 24a60c6448e70d9198ad6ba93520958c  | 477 | 0.999999999999994 | FALSE   |
| 28b8399c2b0790f21a60a17d495c620a  | 386 | 0.999999999999998 | FALSE   |
| 520c77820886daeb8cf0d6497cfb1344  | 311 | 0.999999999999998 | FALSE   |
| 5aa8281fbf9be4bfb7ac852f1bdf8fe   | 373 | 0.999999999999999 | FALSE   |
| 77acce47fd181b78f7e66aad08abe01   | 439 |                   | 1 FALSE |
| 5f92443932d0deb4cf0d196b6e4fe4c0  | 396 |                   | 1 FALSE |
| 3f0d06b8c1b5e61b424af5b55ee3496d  | 411 |                   | 1 FALSE |
| e92e9e21eab765c6ada40b76b7df1e0c  | 417 |                   | 1 FALSE |
| 523ac9f41cf23bf8c67d6537760b28d5  | 361 |                   | 1 FALSE |
| 49fc1baff761bf9d357844d43cd138ed  | 1   | NA                | FALSE   |
| 91d6bece60976a50b9051eaa4bf40ad9  | 1   | NA                | FALSE   |
| 41916132a0320d7898614ab3368c5217  | 1   | NA                | FALSE   |
| 8811d5912a35b66dd56a85f2f84756f   | 1   | NA                | FALSE   |
| 061cc3fd68a078dfc17c89dd4e7c1d57  | 1   | NA                | FALSE   |
| f5b36d223324383df303174975ce46d5  | 1   | NA                | FALSE   |
| 36bb4e0630608c32e7b2a4b043c399c1  | 1   | NA                | FALSE   |
| 0984365862e8b81ae110762355cd5356  | 1   | NA                | FALSE   |
| 59f71f034d6f5f3211ce16437c08a399  | 1   | NA                | FALSE   |
| 8dcdc18ee9b372e12ad9acf3b560f0de  | 1   | NA                | FALSE   |
| f42582c91ba40de887b64d7b2356d6d8  | 1   | NA                | FALSE   |
| dbd6a52a5c2d8dd052e383c067109d73  | 1   | NA                | FALSE   |
| 3540e1ab31453e650aed7b1c16c68373  | 1   | NA                | FALSE   |
| ae37473e32867acb33cd941ca2a0bc9f  | 1   | NA                | FALSE   |
| 6639175de58b5f0ee31f8300c07adc72  | 1   | NA                | FALSE   |
| 8cf34b55c0736c2a6e94f72fd0aa07e1  | 1   | NA                | FALSE   |
| 408f662e9702a6252066a482053dfa05  | 1   | NA                | FALSE   |
| 0556309e565282e3cdc6d22c7a1314ca  | 1   | NA                | FALSE   |
| a31397646d05a84f8890b670601c2a88  | 1   | NA                | FALSE   |
| c6e6c1884afc6be4ad05add5339cc95e  | 1   | NA                | FALSE   |
| 1e3ca86e4fa19f2b96529f8a78b6304a  | 1   | NA                | FALSE   |
| 90a7ad77ba874fb1ad37e15e4defbb91  | 1   | NA                | FALSE   |
| 6e0436014e7f545bb0c89cf90bf2c82   | 1   | NA                | FALSE   |
| 1488392be87091b8779262c95753d489  | 1   | NA                | FALSE   |

|                                  |      |       |
|----------------------------------|------|-------|
| 71a639b66d4d99791d5c69e649932498 | 1 NA | FALSE |
| b90a3f4af43dd1eadaac36033d825b32 | 1 NA | FALSE |
| 7c085dcaa22450a60d0bcdf9c02f1d   | 1 NA | FALSE |
| 7615b39e73064bf612abefe1336a5f5e | 1 NA | FALSE |
| 0cf91d09851e5165515a95c48f990b2c | 1 NA | FALSE |
| 40ef360e3de9eef2e54cc384c0f442fb | 1 NA | FALSE |
| c9d2e62830d879d1b703ec112804ed4f | 1 NA | FALSE |
| 179dfc0f76a5c60ed0db3f36ea4103d5 | 1 NA | FALSE |
| 59bbb81117691ae8817ac815f73b9945 | 1 NA | FALSE |
| 27cee38f3d317da09942584a9e611701 | 1 NA | FALSE |
| a344d280d5637fa174318df87463e8b2 | 1 NA | FALSE |
| 1abf91747a161b143a6733473add3d1f | 1 NA | FALSE |
| 58172f93459801cf780471559743a1a1 | 1 NA | FALSE |
| 2dbe816b5bd581af1d9e40b426a3ccc5 | 1 NA | FALSE |
| ad213ddb834c49ba5c3fb2c35715ea31 | 1 NA | FALSE |
| f4759806bae7e262721beb08f96af6f2 | 1 NA | FALSE |
| 9f6cc04b4b011455a72b5a60460c23   | 1 NA | FALSE |
| c3a7e5679db8cc9a7dcb122d21a62abd | 1 NA | FALSE |
| 99655509650822e576d12e2203109953 | 1 NA | FALSE |
| c4a5fa167be7022d7e8f6a24ea5a814e | 1 NA | FALSE |
| a75568deb408dcc5be74bdf23e1f6dc7 | 1 NA | FALSE |
| 6ac5bf8ed56c7709a77fc026615798ad | 1 NA | FALSE |
| 324760267b2fe263a0c835e9af329c00 | 1 NA | FALSE |
| 6f5e0038f0b835752a599ff8ec9801ea | 1 NA | FALSE |
| 88d21bdf6bb7dd539b1f97ef3fd3d11  | 1 NA | FALSE |
| 7148747d2d38f0d895386df0c931dcb4 | 1 NA | FALSE |
| fa50250efdc5d41bd6577db321412f03 | 1 NA | FALSE |
| 8d97a06ddc80deb17af3ed88f954f8e1 | 1 NA | FALSE |
| f68c7cd7566c0f1295c0e531c09b5c1f | 1 NA | FALSE |
| 8c3070a01c5d1017b27e2dac97270d05 | 1 NA | FALSE |
| 7425d153990b97e5f0e131d3cad5aa4  | 1 NA | FALSE |
| c1d232ebefcae769cf656b0931cd11a  | 1 NA | FALSE |
| 7591056a10b3bd4cc962154330349ef  | 1 NA | FALSE |
| 20c1ba0382813ccc891453a72745d2d  | 1 NA | FALSE |
| ced6caa0b6c0ffc98a8414b5bdc83112 | 1 NA | FALSE |
| 3f1c0b87de5bb4df2b8d2e6b36bed0ab | 1 NA | FALSE |
| f6799ce3e138384ebd9119e29709a3f3 | 1 NA | FALSE |
| 855b88b34ea95ec7b5c3de4ad4c824ee | 1 NA | FALSE |
| 30adb700aa2336a724166e014d162e7f | 1 NA | FALSE |
| 5cd044dfb5feca3ee72dae76fa6e9ee9 | 1 NA | FALSE |
| 5e6f632ca87cf43563b74e15539e7785 | 1 NA | FALSE |
| bd96e429d73d57cbb9c8ef9bc46b7820 | 1 NA | FALSE |
| 65e2fe387bdf0fa880811cceac1d59e  | 1 NA | FALSE |
| 5a14b8ff1aecd0489c6820e8e105b88  | 1 NA | FALSE |
| ef5a2480e5d717d0c565e287f82a473  | 1 NA | FALSE |
| 9ae9c5171312ae7ce382a7baa6b81362 | 1 NA | FALSE |
| 0911bb8210812727927796066a861651 | 1 NA | FALSE |
| 85a7a2746dba46cd60d893ad0b3d35f  | 1 NA | FALSE |
| 3114f9c7de279de58fe3dc15e2dd14fb | 1 NA | FALSE |
| b4bee6fb68e88d00ba80c1bc627510c0 | 1 NA | FALSE |
| 12679b50e6d1202949122b8b0622ade1 | 1 NA | FALSE |
| 9f2cf0e7035d0f777c21936203005b14 | 1 NA | FALSE |
| 394c2ec9cae1af76e0b585fedac13a2  | 1 NA | FALSE |
| 8bedbd900998bc8be0f4e32027c14b79 | 1 NA | FALSE |
| d91b9586180e2dc67db8d50bfc06d00c | 1 NA | FALSE |
| 9ae3e5447f15b13586d0d3803b8e68af | 1 NA | FALSE |
| e50354b9c4d97287a20c1e167dfefa3e | 1 NA | FALSE |
| ba76aae4914cd1c68039931188d050fe | 1 NA | FALSE |
| 03b679010b1bf8b116785f42667e02e1 | 1 NA | FALSE |
| e7eb03a5b2a368b8a6099d242bcacd54 | 1 NA | FALSE |
| 945f64283b2eba0afa876de55b78ef31 | 1 NA | FALSE |
| c686148b8d01f84f7604bc5fcaddbebd | 1 NA | FALSE |
| 0407fd8be2c9084dafdf0c2cd3d0befa | 1 NA | FALSE |
| 8d2de3aea083cf47d1eae80c2af9146  | 1 NA | FALSE |
| 3e23230e4686b96576316f5e033b7082 | 1 NA | FALSE |
| 6e7e1fbac8c5e839a9cdfc5fba8f7770 | 1 NA | FALSE |
| 7b3fa6d9e1062f0b6537b7372012b859 | 1 NA | FALSE |
| d19aea26e0ad7c2155fdd287a2ec6b77 | 1 NA | FALSE |
| 0ca49b13050f305492d115000a1d001d | 1 NA | FALSE |
| 2b9cede5145c126ca5a5de9fc895a14b | 1 NA | FALSE |
| 1a902f04710149ed9498c3e99a5afd63 | 1 NA | FALSE |
| 8577af56ac1b94a1aa8b74077b5a5cbc | 1 NA | FALSE |
| bd1a351302ec362f46db2979bada621d | 1 NA | FALSE |
| 352144a7596df7857029b20703ae2eda | 1 NA | FALSE |
| 5c3c19675e638054dd3325e5ba5677d2 | 1 NA | FALSE |
| 15d139a08d6c1648ba4c20c9995ab9b2 | 1 NA | FALSE |
| 2ca106d719b5911c71a6e189459efa66 | 1 NA | FALSE |
| 845f586ce16f4bd61ab41379809ae1e7 | 1 NA | FALSE |
| 72b07965cf4f08eff549d0053d0906f1 | 1 NA | FALSE |
| 1b336d762092361e9f7c04a56548a6a2 | 1 NA | FALSE |
| 2429b0edc950114d01dded0d631166cd | 1 NA | FALSE |
| 3f839cccd6e9568fcb569b0e4f7d6ee8 | 1 NA | FALSE |

|                                  |      |       |
|----------------------------------|------|-------|
| 1c0e84ab16636a5d983a7f210354520b | 1 NA | FALSE |
| f7163bb266bce765f0aa145cf7a6c37f | 1 NA | FALSE |
| 6fd9843eb698930e30818d77d505ed5c | 1 NA | FALSE |
| 94b612176f3b4cea22cda2f67134ebe6 | 1 NA | FALSE |
| 25ddb3b811c0140bec907e45cf4b2a45 | 1 NA | FALSE |
| 68f55b94cf23a2b444b7c8929907eb7f | 1 NA | FALSE |
| 97f006e854e73edfcec1415ac23de6d  | 1 NA | FALSE |
| 8171a8faf564215283a3fccfe23a4026 | 1 NA | FALSE |
| 3eac2f1f0d1c5a98e4dcfe3bb7c16709 | 1 NA | FALSE |
| 832fadfb5fe2b9bec572b5788cfb3f73 | 1 NA | FALSE |
| 7a538dcb40656b6be4c267503c501b0a | 1 NA | FALSE |
| 4e4b6a3260a6061be4590ed7fd29a214 | 1 NA | FALSE |
| 5ed7d64c93da6dfb32f43400d14ca8e3 | 1 NA | FALSE |
| 3e92de515639a37692e35e261af54e98 | 1 NA | FALSE |
| 1848ba16ac6e038d4be98fd5d7bfead2 | 1 NA | FALSE |
| bb5e5ae0efa9bf009dd646ebcac3bab4 | 1 NA | FALSE |
| 703968088ed15033df6c62f2530e50b3 | 1 NA | FALSE |
| 62107a3ffb0f00f6ff881660f970e449 | 1 NA | FALSE |
| d3f91dd2f8e03e272362cb77276b159c | 1 NA | FALSE |
| 37e1ba9d0783625524befd620d1e3d29 | 1 NA | FALSE |
| 3d6c6053fcc0b58354ac9dbe2d2f699e | 1 NA | FALSE |

|           | #16s_sampleID                 | Subject    | Monthcat | Group   | mBorg     | 6MWT      | CAT       |
|-----------|-------------------------------|------------|----------|---------|-----------|-----------|-----------|
| Sample_1  | 16s_sampl 3R451_FU:3R451_FU:  | subject3R4 | M0       | Control | Not apply | Not apply | Not apply |
| Sample_2  | 16s_sampl 3R452_FU:3R452_FU:  | subject3R4 | M0       | Control | Not apply | Not apply | Not apply |
| Sample_3  | 16s_sampl 3R_455_M3R_455_M    | subject3R4 | M0       | Control | Not apply | Not apply | Not apply |
| Sample_4  | 16s_sampl 508_FU1_f 508_FU1_f | subject508 | M0       | Control | Not apply | Not apply | Not apply |
| Sample_5  | 16s_sampl 509_FU1_f 509_FU1_f | subject509 | M0       | Control | Not apply | Not apply | Not apply |
| Sample_6  | 16s_sampl 519_M1_p 519_M1_p   | subject519 | M0       | Control | Not apply | Not apply | Not apply |
| Sample_7  | 16s_sampl 526_FU1_f 526_FU1_f | subject526 | M0       | Control | Not apply | Not apply | Not apply |
| Sample_8  | 16s_sampl 527_FU1_f 527_FU1_f | subject527 | M0       | Control | Not apply | Not apply | Not apply |
| Sample_9  | 16s_sampl 540_M1_L 540_M1_L   | subject540 | M0       | Control | Not apply | Not apply | Not apply |
| Sample_10 | 16s_sampl 578_M1_L 578_M1_L   | subject578 | M0       | Control | Not apply | Not apply | Not apply |
| Sample_11 | 16s_sampl 583_FU1_f 583_FU1_f | subject583 | M0       | Control | Not apply | Not apply | Not apply |
| Sample_12 | 16s_sampl 649_FU1_f 649_FU1_f | subject649 | M0       | Control | Not apply | Not apply | Not apply |
| Sample_13 | 16s_sampl 663_M1_L 663_M1_L   | subject663 | M0       | Control | Not apply | Not apply | Not apply |
| Sample_14 | 16s_sampl 665_M1_p 665_M1_p   | subject665 | M0       | Control | Not apply | Not apply | Not apply |
| Sample_15 | 16s_sampl 676_M1_L 676_M1_L   | subject676 | M0       | Control | Not apply | Not apply | Not apply |
| Sample_16 | 16s_sampl 678_M1_p 678_M1_p   | subject678 | M0       | Control | Not apply | Not apply | Not apply |
| Sample_17 | 16s_sampl 694_M1_p 694_M1_p   | subject694 | M0       | Control | Not apply | Not apply | Not apply |
| Sample_18 | 16s_sampl 695_M1_L 695_M1_L   | subject695 | M0       | Control | Not apply | Not apply | Not apply |
| Sample_19 | 16s_sampl 794_FU1_f 794_FU1_f | subject794 | M0       | Control | Not apply | Not apply | Not apply |
| Sample_20 | 16s_sampl 795_FU1_f 795_FU1_f | subject795 | M0       | Control | Not apply | Not apply | Not apply |
| Sample_21 | 16s_sampl 801_FU1_f 801_FU1_f | subject801 | M0       | Control | Not apply | Not apply | Not apply |
| Sample_22 | 16s_sampl 807_FU1_f 807_FU1_f | subject807 | M0       | Control | Not apply | Not apply | Not apply |
| Sample_23 | 16s_sampl 809_FU1_f 809_FU1_f | subject809 | M0       | Control | Not apply | Not apply | Not apply |
| Sample_24 | 16s_sampl 830_FU1_f 830_FU1_f | subject830 | M0       | Control | Not apply | Not apply | Not apply |
| Sample_25 | 16s_sampl 833_FU1_f 833_FU1_f | subject833 | M0       | Control | Not apply | Not apply | Not apply |
| Sample_26 | 16s_sampl 837_M1_L 837_M1_L   | subject837 | M0       | Control | Not apply | Not apply | Not apply |
| Sample_27 | 16s_sampl 851_FU1_f 851_FU1_f | subject851 | M0       | Control | Not apply | Not apply | Not apply |
| Sample_28 | 16s_sampl 880_M1_L 880_M1_L   | subject880 | M0       | Control | Not apply | Not apply | Not apply |
| Sample_29 | 16s_sampl 884_M1_L 884_M1_L   | subject884 | M0       | Control | Not apply | Not apply | Not apply |
| Sample_30 | 16s_sampl 885_M1_p 885_M1_p   | subject885 | M0       | Control | Not apply | Not apply | Not apply |
| Sample_31 | 16s_sampl 891_M1_L 891_M1_L   | subject891 | M0       | Control | Not apply | Not apply | Not apply |
| Sample_32 | 16s_sampl 897_M1_L 897_M1_L   | subject897 | M0       | Control | Not apply | Not apply | Not apply |
| Sample_33 | 16s_sampl 907_M1_L 907_M1_L   | subject907 | M0       | Control | Not apply | Not apply | Not apply |
| Sample_34 | 16s_sampl 934_M1_L 934_M1_L   | subject934 | M0       | Control | Not apply | Not apply | Not apply |
| Sample_35 | 16s_sampl 935_FU1_f 935_FU1_f | subject935 | M0       | Control | Not apply | Not apply | Not apply |
| Sample_36 | 16s_sampl P101_FU1_P101_FU1_  | subjectP10 | M0       | Control | Not apply | Not apply | Not apply |
| Sample_37 | 16s_sampl P201_FU1_P201_FU1_  | subjectP20 | M0       | Control | Not apply | Not apply | Not apply |
| Sample_38 | 16s_sampl P204_FU1_P204_FU1_  | subjectP20 | M0       | Control | Not apply | Not apply | Not apply |
| Sample_39 | 16s_sampl 3R451_FU:3R451_FU:  | subject3R4 | M1       | Control | Not apply | Not apply | Not apply |
| Sample_40 | 16s_sampl 3R452_FU:3R452_FU:  | subject3R4 | M1       | Control | Not apply | Not apply | Not apply |
| Sample_41 | 16s_sampl 3R_455_M3R_455_M    | subject3R4 | M1       | Control | Not apply | Not apply | Not apply |
| Sample_42 | 16s_sampl 508_FU2_f 508_FU2_f | subject508 | M1       | Control | Not apply | Not apply | Not apply |
| Sample_43 | 16s_sampl 509_FU2_f 509_FU2_f | subject509 | M1       | Control | Not apply | Not apply | Not apply |
| Sample_44 | 16s_sampl 519_M2_p 519_M2_p   | subject519 | M1       | Control | Not apply | Not apply | Not apply |
| Sample_45 | 16s_sampl 526_FU2_f 526_FU2_f | subject526 | M1       | Control | Not apply | Not apply | Not apply |
| Sample_46 | 16s_sampl 527_FU2_f 527_FU2_f | subject527 | M1       | Control | Not apply | Not apply | Not apply |
| Sample_47 | 16s_sampl 540_M2_L 540_M2_L   | subject540 | M1       | Control | Not apply | Not apply | Not apply |
| Sample_48 | 16s_sampl 578_M2_L 578_M2_L   | subject578 | M1       | Control | Not apply | Not apply | Not apply |
| Sample_49 | 16s_sampl 583_FU2_f 583_FU2_f | subject583 | M1       | Control | Not apply | Not apply | Not apply |
| Sample_50 | 16s_sampl 649_FU2_f 649_FU2_f | subject649 | M1       | Control | Not apply | Not apply | Not apply |

|                                                      |         |           |           |           |
|------------------------------------------------------|---------|-----------|-----------|-----------|
| Sample_5116s_sampl 663_M2_L 663_M2_L subject663 M1   | Control | Not apply | Not apply | Not apply |
| Sample_5216s_sampl 665_M2_p 665_M2_p subject665 M1   | Control | Not apply | Not apply | Not apply |
| Sample_5316s_sampl 676_M2_L 676_M2_L subject676 M1   | Control | Not apply | Not apply | Not apply |
| Sample_5416s_sampl 678_M2_p 678_M2_p subject678 M1   | Control | Not apply | Not apply | Not apply |
| Sample_5516s_sampl 694_M2_p 694_M2_p subject694 M1   | Control | Not apply | Not apply | Not apply |
| Sample_5616s_sampl 695_M2_L 695_M2_L subject695 M1   | Control | Not apply | Not apply | Not apply |
| Sample_5716s_sampl 794_FU2_f 794_FU2_f subject794 M1 | Control | Not apply | Not apply | Not apply |
| Sample_5816s_sampl 795_FU2_f 795_FU2_f subject795 M1 | Control | Not apply | Not apply | Not apply |
| Sample_5916s_sampl 801_FU2_f 801_FU2_f subject801 M1 | Control | Not apply | Not apply | Not apply |
| Sample_6016s_sampl 807_FU2_f 807_FU2_f subject807 M1 | Control | Not apply | Not apply | Not apply |
| Sample_6116s_sampl 809_FU2_f 809_FU2_f subject809 M1 | Control | Not apply | Not apply | Not apply |
| Sample_6216s_sampl 830_FU2_f 830_FU2_f subject830 M1 | Control | Not apply | Not apply | Not apply |
| Sample_6316s_sampl 833_FU2_f 833_FU2_f subject833 M1 | Control | Not apply | Not apply | Not apply |
| Sample_6416s_sampl 837_M2_L 837_M2_L subject837 M1   | Control | Not apply | Not apply | Not apply |
| Sample_6516s_sampl 851_FU2_f 851_FU2_f subject851 M1 | Control | Not apply | Not apply | Not apply |
| Sample_6616s_sampl 880_M2_L 880_M2_L subject880 M1   | Control | Not apply | Not apply | Not apply |
| Sample_6716s_sampl 884_M2_L 884_M2_L subject884 M1   | Control | Not apply | Not apply | Not apply |
| Sample_6816s_sampl 885_M2_p 885_M2_p subject885 M1   | Control | Not apply | Not apply | Not apply |
| Sample_6916s_sampl 891_M2_L 891_M2_L subject891 M1   | Control | Not apply | Not apply | Not apply |
| Sample_7016s_sampl 897_M2_L 897_M2_L subject897 M1   | Control | Not apply | Not apply | Not apply |
| Sample_7116s_sampl 907_M2_L 907_M2_L subject907 M1   | Control | Not apply | Not apply | Not apply |
| Sample_7216s_sampl 934_M2_L 934_M2_L subject934 M1   | Control | Not apply | Not apply | Not apply |
| Sample_7316s_sampl 935_FU2_f 935_FU2_f subject935 M1 | Control | Not apply | Not apply | Not apply |
| Sample_7416s_sampl P101_FU2_P101_FU2 subjectP10 M1   | Control | Not apply | Not apply | Not apply |
| Sample_7516s_sampl P201_FU2_P201_FU2 subjectP20 M1   | Control | Not apply | Not apply | Not apply |
| Sample_7616s_sampl P204_FU2_P204_FU2 subjectP20 M1   | Control | Not apply | Not apply | Not apply |
| Sample_7716s_sampl 3R451_FU:3R451_FU: subject3R4 M2  | Control | Not apply | Not apply | Not apply |
| Sample_7816s_sampl 3R452_FU:3R452_FU: subject3R4 M2  | Control | Not apply | Not apply | Not apply |
| Sample_7916s_sampl 3R_455_M3R_455_M subject3R4 M2    | Control | Not apply | Not apply | Not apply |
| Sample_8016s_sampl 508_FU3_f 508_FU3_f subject508 M2 | Control | Not apply | Not apply | Not apply |
| Sample_8116s_sampl 509_FU3_f 509_FU3_f subject509 M2 | Control | Not apply | Not apply | Not apply |
| Sample_8216s_sampl 519_M3_p 519_M3_p subject519 M2   | Control | Not apply | Not apply | Not apply |
| Sample_8316s_sampl 526_FU3_f 526_FU3_f subject526 M2 | Control | Not apply | Not apply | Not apply |
| Sample_8416s_sampl 527_FU3_f 527_FU3_f subject527 M2 | Control | Not apply | Not apply | Not apply |
| Sample_8516s_sampl 540_M3_L 540_M3_L subject540 M2   | Control | Not apply | Not apply | Not apply |
| Sample_8616s_sampl 578_M3_L 578_M3_L subject578 M2   | Control | Not apply | Not apply | Not apply |
| Sample_8716s_sampl 583_FU3_f 583_FU3_f subject583 M2 | Control | Not apply | Not apply | Not apply |
| Sample_8816s_sampl 649_FU3_f 649_FU3_f subject649 M2 | Control | Not apply | Not apply | Not apply |
| Sample_8916s_sampl 663_M3_L 663_M3_L subject663 M2   | Control | Not apply | Not apply | Not apply |
| Sample_9016s_sampl 665_M3_p 665_M3_p subject665 M2   | Control | Not apply | Not apply | Not apply |
| Sample_9116s_sampl 676_M3_L 676_M3_L subject676 M2   | Control | Not apply | Not apply | Not apply |
| Sample_9216s_sampl 678_M3_p 678_M3_p subject678 M2   | Control | Not apply | Not apply | Not apply |
| Sample_9316s_sampl 694_M3_p 694_M3_p subject694 M2   | Control | Not apply | Not apply | Not apply |
| Sample_9416s_sampl 695_M3_L 695_M3_L subject695 M2   | Control | Not apply | Not apply | Not apply |
| Sample_9516s_sampl 794_FU3_f 794_FU3_f subject794 M2 | Control | Not apply | Not apply | Not apply |
| Sample_9616s_sampl 795_FU3_f 795_FU3_f subject795 M2 | Control | Not apply | Not apply | Not apply |
| Sample_9716s_sampl 801_FU3_f 801_FU3_f subject801 M2 | Control | Not apply | Not apply | Not apply |
| Sample_9816s_sampl 807_FU3_f 807_FU3_f subject807 M2 | Control | Not apply | Not apply | Not apply |
| Sample_9916s_sampl 809_FU3_f 809_FU3_f subject809 M2 | Control | Not apply | Not apply | Not apply |
| Sample_1016s_sampl 830_FU3_f 830_FU3_f subject830 M2 | Control | Not apply | Not apply | Not apply |
| Sample_1016s_sampl 833_FU3_f 833_FU3_f subject833 M2 | Control | Not apply | Not apply | Not apply |



|                                                      |         |           |           |           |
|------------------------------------------------------|---------|-----------|-----------|-----------|
| Sample_1C16s_sampl 837_M3_L 837_M3_L subject837 M2   | Control | Not apply | Not apply | Not apply |
| Sample_1C16s_sampl 851_FU3_f 851_FU3_f subject851 M2 | Control | Not apply | Not apply | Not apply |
| Sample_1C16s_sampl 880_M3_L 880_M3_L subject880 M2   | Control | Not apply | Not apply | Not apply |
| Sample_1C16s_sampl 884_M3_L 884_M3_L subject884 M2   | Control | Not apply | Not apply | Not apply |
| Sample_1C16s_sampl 885_M3_p 885_M3_p subject885 M2   | Control | Not apply | Not apply | Not apply |
| Sample_1C16s_sampl 891_M3_L 891_M3_L subject891 M2   | Control | Not apply | Not apply | Not apply |
| Sample_1C16s_sampl 897_M3_L 897_M3_L subject897 M2   | Control | Not apply | Not apply | Not apply |
| Sample_1C16s_sampl 907_M3_L 907_M3_L subject907 M2   | Control | Not apply | Not apply | Not apply |
| Sample_1116s_sampl 934_M3_L 934_M3_L subject934 M2   | Control | Not apply | Not apply | Not apply |
| Sample_1116s_sampl 935_FU3_f 935_FU3_f subject935 M2 | Control | Not apply | Not apply | Not apply |
| Sample_1116s_sampl P101_FU3_P101_FU3 subjectP10 M2   | Control | Not apply | Not apply | Not apply |
| Sample_1116s_sampl P201_FU3_P201_FU3 subjectP20 M2   | Control | Not apply | Not apply | Not apply |
| Sample_1116s_sampl P204_FU3_P204_FU3 subjectP20 M2   | Control | Not apply | Not apply | Not apply |
| Sample_1116s_sampl 3R451_FU_3R451_FU_ subject3R4 M3  | Control | Not apply | Not apply | Not apply |
| Sample_1116s_sampl 3R452_FU_3R452_FU_ subject3R4 M3  | Control | Not apply | Not apply | Not apply |
| Sample_1116s_sampl 3R_455_M3R_455_M subject3R4 M3    | Control | Not apply | Not apply | Not apply |
| Sample_1116s_sampl 508_FU4_f 508_FU4_f subject508 M3 | Control | Not apply | Not apply | Not apply |
| Sample_1116s_sampl 509_FU4_f 509_FU4_f subject509 M3 | Control | Not apply | Not apply | Not apply |
| Sample_1216s_sampl 519_M4_p 519_M4_p subject519 M3   | Control | Not apply | Not apply | Not apply |
| Sample_1216s_sampl 526_FU4_f 526_FU4_f subject526 M3 | Control | Not apply | Not apply | Not apply |
| Sample_1216s_sampl 527_FU4_f 527_FU4_f subject527 M3 | Control | Not apply | Not apply | Not apply |
| Sample_1216s_sampl 540_M4_L 540_M4_L subject540 M3   | Control | Not apply | Not apply | Not apply |
| Sample_1216s_sampl 578_M4_L 578_M4_L subject578 M3   | Control | Not apply | Not apply | Not apply |
| Sample_1216s_sampl 583_FU4_f 583_FU4_f subject583 M3 | Control | Not apply | Not apply | Not apply |
| Sample_1216s_sampl 649_FU4_f 649_FU4_f subject649 M3 | Control | Not apply | Not apply | Not apply |
| Sample_1216s_sampl 663_M4_L 663_M4_L subject663 M3   | Control | Not apply | Not apply | Not apply |
| Sample_1216s_sampl 665_M4_p 665_M4_p subject665 M3   | Control | Not apply | Not apply | Not apply |
| Sample_1216s_sampl 676_M4_L 676_M4_L subject676 M3   | Control | Not apply | Not apply | Not apply |
| Sample_1316s_sampl 678_M4_p 678_M4_p subject678 M3   | Control | Not apply | Not apply | Not apply |
| Sample_1316s_sampl 694_M4_p 694_M4_p subject694 M3   | Control | Not apply | Not apply | Not apply |
| Sample_1316s_sampl 695_M4_L 695_M4_L subject695 M3   | Control | Not apply | Not apply | Not apply |
| Sample_1316s_sampl 794_FU4_f 794_FU4_f subject794 M3 | Control | Not apply | Not apply | Not apply |
| Sample_1316s_sampl 795_FU4_f 795_FU4_f subject795 M3 | Control | Not apply | Not apply | Not apply |
| Sample_1316s_sampl 801_FU4_f 801_FU4_f subject801 M3 | Control | Not apply | Not apply | Not apply |
| Sample_1316s_sampl 807_FU4_f 807_FU4_f subject807 M3 | Control | Not apply | Not apply | Not apply |
| Sample_1316s_sampl 809_FU4_f 809_FU4_f subject809 M3 | Control | Not apply | Not apply | Not apply |
| Sample_1316s_sampl 830_FU4_f 830_FU4_f subject830 M3 | Control | Not apply | Not apply | Not apply |
| Sample_1316s_sampl 833_FU4_f 833_FU4_f subject833 M3 | Control | Not apply | Not apply | Not apply |
| Sample_1416s_sampl 837_M4_L 837_M4_L subject837 M3   | Control | Not apply | Not apply | Not apply |
| Sample_1416s_sampl 851_FU4_f 851_FU4_f subject851 M3 | Control | Not apply | Not apply | Not apply |
| Sample_1416s_sampl 880_M4_L 880_M4_L subject880 M3   | Control | Not apply | Not apply | Not apply |
| Sample_1416s_sampl 884_M4_L 884_M4_L subject884 M3   | Control | Not apply | Not apply | Not apply |
| Sample_1416s_sampl 885_M4_p 885_M4_p subject885 M3   | Control | Not apply | Not apply | Not apply |
| Sample_1416s_sampl 891_M4_L 891_M4_L subject891 M3   | Control | Not apply | Not apply | Not apply |
| Sample_1416s_sampl 897_M4_L 897_M4_L subject897 M3   | Control | Not apply | Not apply | Not apply |
| Sample_1416s_sampl 907_M4_L 907_M4_L subject907 M3   | Control | Not apply | Not apply | Not apply |
| Sample_1416s_sampl 934_M4_L 934_M4_L subject934 M3   | Control | Not apply | Not apply | Not apply |
| Sample_1416s_sampl 935_FU4_f 935_FU4_f subject935 M3 | Control | Not apply | Not apply | Not apply |
| Sample_1516s_sampl P101_FU4_P101_FU4 subjectP10 M3   | Control | Not apply | Not apply | Not apply |
| Sample_1516s_sampl P201_FU4_P201_FU4 subjectP20 M3   | Control | Not apply | Not apply | Not apply |
| Sample_1516s_sampl P204_FU4_P204_FU4 subjectP20 M3   | Control | Not apply | Not apply | Not apply |

|                                                    |         |           |           |           |
|----------------------------------------------------|---------|-----------|-----------|-----------|
| Sample_1516s_sampl 3R451_FU!3R451_FU!subject3R4 M4 | Control | Not apply | Not apply | Not apply |
| Sample_1516s_sampl 3R452_FU!3R452_FU!subject3R4 M4 | Control | Not apply | Not apply | Not apply |
| Sample_1516s_sampl 3R_455_M3R_455_Msubject3R4 M4   | Control | Not apply | Not apply | Not apply |
| Sample_1516s_sampl 508_FU5_†508_FU5_†subject508 M4 | Control | Not apply | Not apply | Not apply |
| Sample_1516s_sampl 509_FU5_†509_FU5_†subject509 M4 | Control | Not apply | Not apply | Not apply |
| Sample_1516s_sampl 519_M5_p519_M5_psubject519 M4   | Control | Not apply | Not apply | Not apply |
| Sample_1516s_sampl 526_FU5_†526_FU5_†subject526 M4 | Control | Not apply | Not apply | Not apply |
| Sample_1616s_sampl 527_FU5_†527_FU5_†subject527 M4 | Control | Not apply | Not apply | Not apply |
| Sample_1616s_sampl 540_M5_L540_M5_Lsubject540 M4   | Control | Not apply | Not apply | Not apply |
| Sample_1616s_sampl 578_M5_L578_M5_Lsubject578 M4   | Control | Not apply | Not apply | Not apply |
| Sample_1616s_sampl 583_FU5_†583_FU5_†subject583 M4 | Control | Not apply | Not apply | Not apply |
| Sample_1616s_sampl 649_FU5_†649_FU5_†subject649 M4 | Control | Not apply | Not apply | Not apply |
| Sample_1616s_sampl 663_M5_L663_M5_Lsubject663 M4   | Control | Not apply | Not apply | Not apply |
| Sample_1616s_sampl 665_M5_p665_M5_psubject665 M4   | Control | Not apply | Not apply | Not apply |
| Sample_1616s_sampl 676_M5_L676_M5_Lsubject676 M4   | Control | Not apply | Not apply | Not apply |
| Sample_1616s_sampl 678_M5_p678_M5_psubject678 M4   | Control | Not apply | Not apply | Not apply |
| Sample_1616s_sampl 694_M5_p694_M5_psubject694 M4   | Control | Not apply | Not apply | Not apply |
| Sample_1716s_sampl 695_M5_L695_M5_Lsubject695 M4   | Control | Not apply | Not apply | Not apply |
| Sample_1716s_sampl 794_FU5_†794_FU5_†subject794 M4 | Control | Not apply | Not apply | Not apply |
| Sample_1716s_sampl 795_FU5_†795_FU5_†subject795 M4 | Control | Not apply | Not apply | Not apply |
| Sample_1716s_sampl 801_FU5_†801_FU5_†subject801 M4 | Control | Not apply | Not apply | Not apply |
| Sample_1716s_sampl 807_FU5_†807_FU5_†subject807 M4 | Control | Not apply | Not apply | Not apply |
| Sample_1716s_sampl 809_FU5_†809_FU5_†subject809 M4 | Control | Not apply | Not apply | Not apply |
| Sample_1716s_sampl 830_FU5_†830_FU5_†subject830 M4 | Control | Not apply | Not apply | Not apply |
| Sample_1716s_sampl 833_FU5_†833_FU5_†subject833 M4 | Control | Not apply | Not apply | Not apply |
| Sample_1716s_sampl 837_M5_L837_M5_Lsubject837 M4   | Control | Not apply | Not apply | Not apply |
| Sample_1716s_sampl 851_FU5_†851_FU5_†subject851 M4 | Control | Not apply | Not apply | Not apply |
| Sample_1816s_sampl 880_M5_L880_M5_Lsubject880 M4   | Control | Not apply | Not apply | Not apply |
| Sample_1816s_sampl 884_M5_L884_M5_Lsubject884 M4   | Control | Not apply | Not apply | Not apply |
| Sample_1816s_sampl 885_M5_p885_M5_psubject885 M4   | Control | Not apply | Not apply | Not apply |
| Sample_1816s_sampl 891_M5_L891_M5_Lsubject891 M4   | Control | Not apply | Not apply | Not apply |
| Sample_1816s_sampl 897_M5_L897_M5_Lsubject897 M4   | Control | Not apply | Not apply | Not apply |
| Sample_1816s_sampl 907_M5_L907_M5_Lsubject907 M4   | Control | Not apply | Not apply | Not apply |
| Sample_1816s_sampl 934_M5_L934_M5_Lsubject934 M4   | Control | Not apply | Not apply | Not apply |
| Sample_1816s_sampl 935_FU5_†935_FU5_†subject935 M4 | Control | Not apply | Not apply | Not apply |
| Sample_1816s_sampl P101_FU5_P101_FU5_subjectP10 M4 | Control | Not apply | Not apply | Not apply |
| Sample_1816s_sampl P201_FU5_P201_FU5_subjectP20 M4 | Control | Not apply | Not apply | Not apply |
| Sample_1916s_sampl P204_FU5_P204_FU5_subjectP20 M4 | Control | Not apply | Not apply | Not apply |
| Sample_1916s_sampl 3R451_FU(3R451_FU(subject3R4 M5 | Control | Not apply | Not apply | Not apply |
| Sample_1916s_sampl 3R452_FU(3R452_FU(subject3R4 M5 | Control | Not apply | Not apply | Not apply |
| Sample_1916s_sampl 3R_455_M3R_455_Msubject3R4 M5   | Control | Not apply | Not apply | Not apply |
| Sample_1916s_sampl 508_FU6_†508_FU6_†subject508 M5 | Control | Not apply | Not apply | Not apply |
| Sample_1916s_sampl 509_FU6_†509_FU6_†subject509 M5 | Control | Not apply | Not apply | Not apply |
| Sample_1916s_sampl 519_M6_p519_M6_psubject519 M5   | Control | Not apply | Not apply | Not apply |
| Sample_1916s_sampl 526_FU6_†526_FU6_†subject526 M5 | Control | Not apply | Not apply | Not apply |
| Sample_1916s_sampl 527_FU6_†527_FU6_†subject527 M5 | Control | Not apply | Not apply | Not apply |
| Sample_1916s_sampl 540_M6_L540_M6_Lsubject540 M5   | Control | Not apply | Not apply | Not apply |
| Sample_2016s_sampl 578_M6_L578_M6_Lsubject578 M5   | Control | Not apply | Not apply | Not apply |
| Sample_2016s_sampl 583_FU6_†583_FU6_†subject583 M5 | Control | Not apply | Not apply | Not apply |
| Sample_2016s_sampl 649_FU6_†649_FU6_†subject649 M5 | Control | Not apply | Not apply | Not apply |
| Sample_2016s_sampl 663_M6_L663_M6_Lsubject663 M5   | Control | Not apply | Not apply | Not apply |

|                                                      |             |           |           |           |
|------------------------------------------------------|-------------|-----------|-----------|-----------|
| Sample_2016s_sampl 665_M6_p 665_M6_p subject665 M5   | Control     | Not apply | Not apply | Not apply |
| Sample_2016s_sampl 676_M6_L 676_M6_L subject676 M5   | Control     | Not apply | Not apply | Not apply |
| Sample_2016s_sampl 678_M6_p 678_M6_p subject678 M5   | Control     | Not apply | Not apply | Not apply |
| Sample_2016s_sampl 694_M6_p 694_M6_p subject694 M5   | Control     | Not apply | Not apply | Not apply |
| Sample_2016s_sampl 695_M6_L 695_M6_L subject695 M5   | Control     | Not apply | Not apply | Not apply |
| Sample_2016s_sampl 794_FU6_f 794_FU6_f subject794 M5 | Control     | Not apply | Not apply | Not apply |
| Sample_2116s_sampl 795_FU6_f 795_FU6_f subject795 M5 | Control     | Not apply | Not apply | Not apply |
| Sample_2116s_sampl 801_FU6_f 801_FU6_f subject801 M5 | Control     | Not apply | Not apply | Not apply |
| Sample_2116s_sampl 807_FU6_f 807_FU6_f subject807 M5 | Control     | Not apply | Not apply | Not apply |
| Sample_2116s_sampl 809_FU6_f 809_FU6_f subject809 M5 | Control     | Not apply | Not apply | Not apply |
| Sample_2116s_sampl 830_FU6_f 830_FU6_f subject830 M5 | Control     | Not apply | Not apply | Not apply |
| Sample_2116s_sampl 833_FU6_f 833_FU6_f subject833 M5 | Control     | Not apply | Not apply | Not apply |
| Sample_2116s_sampl 837_M6_L 837_M6_L subject837 M5   | Control     | Not apply | Not apply | Not apply |
| Sample_2116s_sampl 851_FU6_f 851_FU6_f subject851 M5 | Control     | Not apply | Not apply | Not apply |
| Sample_2116s_sampl 880_M6_L 880_M6_L subject880 M5   | Control     | Not apply | Not apply | Not apply |
| Sample_2116s_sampl 884_M6_L 884_M6_L subject884 M5   | Control     | Not apply | Not apply | Not apply |
| Sample_2216s_sampl 885_M6_p 885_M6_p subject885 M5   | Control     | Not apply | Not apply | Not apply |
| Sample_2216s_sampl 891_M6_L 891_M6_L subject891 M5   | Control     | Not apply | Not apply | Not apply |
| Sample_2216s_sampl 897_M6_L 897_M6_L subject897 M5   | Control     | Not apply | Not apply | Not apply |
| Sample_2216s_sampl 907_M6_L 907_M6_L subject907 M5   | Control     | Not apply | Not apply | Not apply |
| Sample_2216s_sampl 934_M6_L 934_M6_L subject934 M5   | Control     | Not apply | Not apply | Not apply |
| Sample_2216s_sampl 935_FU6_f 935_FU6_f subject935 M5 | Control     | Not apply | Not apply | Not apply |
| Sample_2216s_sampl P101_FU6_P101_FU6 subjectP10 M5   | Control     | Not apply | Not apply | Not apply |
| Sample_2216s_sampl P201_FU6_P201_FU6 subjectP20 M5   | Control     | Not apply | Not apply | Not apply |
| Sample_2216s_sampl P204_FU6_P204_FU6 subjectP20 M5   | Control     | Not apply | Not apply | Not apply |
| Sample_2216s_sampl 3R443_M3 3R443_M3 subject443 M0   | interventic | NR        | R         | NR        |
| Sample_2316s_sampl 3R474_M3 3R474_M3 subject474 M0   | interventic | NR        | R         | NR        |
| Sample_2316s_sampl 3R478_M3 3R478_M3 subject478 M0   | interventic | NR        | NR        | R         |
| Sample_2316s_sampl 3R479_M3 3R479_M3 subject479 M0   | interventic | NR        | NR        | R         |
| Sample_2316s_sampl 3R481_M3 3R481_M3 subject481 M0   | interventic | NR        | NR        | R         |
| Sample_2316s_sampl 3R482_M3 3R482_M3 subject482 M0   | interventic | NR        | NR        | NR        |
| Sample_2316s_sampl 3R486_M3 3R486_M3 subject486 M0   | interventic | NR        | R         | R         |
| Sample_2316s_sampl 3R487_M3 3R487_M3 subject487 M0   | interventic | R         | R         | R         |
| Sample_2316s_sampl 3R488_M3 3R488_M3 subject488 M0   | interventic | R         | R         | NR        |
| Sample_2316s_sampl 3R492_M3 3R492_M3 subject492 M0   | interventic | NR        | R         | NR        |
| Sample_2316s_sampl 3R493_M3 3R493_M3 subject493 M0   | interventic | NR        | R         | R         |
| Sample_2416s_sampl 3R495_M3 3R495_M3 subject495 M0   | interventic | NR        | R         | NR        |
| Sample_2416s_sampl 3R496_M3 3R496_M3 subject496 M0   | interventic | NR        | NR        | NR        |
| Sample_2416s_sampl 3R506_M3 3R506_M3 subject506 M0   | interventic | NR        | NR        | NR        |
| Sample_2416s_sampl 3R512_M3 3R512_M3 subject512 M0   | interventic | NR        | NR        | R         |
| Sample_2416s_sampl 863_M1_L 863_M1_L subject863 M0   | interventic | NR        | R         | R         |
| Sample_2416s_sampl P10_M1_p P10_M1_p subject10 M0    | interventic | R         | R         | R         |
| Sample_2416s_sampl P115_M1_P115_M1 subjectP11 M0     | interventic | NR        | R         | R         |
| Sample_2416s_sampl P11_M3_p P11_M3_p subject11 M0    | interventic | NR        | NR        | R         |
| Sample_2416s_sampl P121_M1_P121_M1 subjectP12 M0     | interventic | NR        | R         | NR        |
| Sample_2416s_sampl P125_M1_P125_M1 subjectP12 M0     | interventic | NR        | R         | R         |
| Sample_2516s_sampl P127_M1_P127_M1 subjectP12 M0     | interventic | NR        | R         | R         |
| Sample_2516s_sampl P129_M1_P129_M1 subjectP12 M0     | interventic | NR        | R         | R         |
| Sample_2516s_sampl P13_M3_p P13_M3_p subjectP13 M0   | interventic | NR        | NR        | R         |
| Sample_2516s_sampl P13_M7_p P13_M7_p subject13 M0    | interventic | NR        | R         | R         |
| Sample_2516s_sampl P140_M1_P140_M1 subjectP14 M0     | interventic | NR        | NR        | NR        |

|                                                     |                |    |    |
|-----------------------------------------------------|----------------|----|----|
| Sample_25 16s_sampl P143_M1_ P143_M1_ subjectP14 M0 | interventic R  | R  | R  |
| Sample_25 16s_sampl P145_M1_ P145_M1_ subjectP14 M0 | interventic R  | R  | R  |
| Sample_25 16s_sampl P147_M1_ P147_M1_ subjectP14 M0 | interventic R  | R  | NR |
| Sample_25 16s_sampl P149_M1_ P149_M1_ subjectP14 M0 | interventic NR | R  | R  |
| Sample_25 16s_sampl P150_M1_ P150_M1_ subjectP15 M0 | interventic R  | NR | NR |
| Sample_26 16s_sampl P16_M3_p P16_M3_p subject16 M0  | interventic NR | R  | R  |
| Sample_26 16s_sampl P18_M3_p P18_M3_p subject18 M0  | interventic NR | NR | NR |
| Sample_26 16s_sampl P19_M3_p P19_M3_p subject19 M0  | interventic NR | NR | R  |
| Sample_26 16s_sampl P1_M3_ph P1_M3_ph subject1 M0   | interventic NR | NR | NR |
| Sample_26 16s_sampl P2_M3_ph P2_M3_ph subject2 M0   | interventic R  | R  | R  |
| Sample_26 16s_sampl P6_M3_ph P6_M3_ph subject6 M0   | interventic NR | R  | R  |
| Sample_26 16s_sampl P7_M3_ph P7_M3_ph subject7 M0   | interventic R  | R  | R  |
| Sample_26 16s_sampl 3R443_M4 3R443_M4 subject443 M1 | interventic NR | R  | NR |
| Sample_26 16s_sampl 3R474_M4 3R474_M4 subject474 M1 | interventic NR | R  | NR |
| Sample_26 16s_sampl 3R478_M4 3R478_M4 subject478 M1 | interventic NR | NR | R  |
| Sample_27 16s_sampl 3R481_M4 3R481_M4 subject481 M1 | interventic NR | NR | R  |
| Sample_27 16s_sampl 3R482_M4 3R482_M4 subject482 M1 | interventic NR | NR | NR |
| Sample_27 16s_sampl 3R486_M4 3R486_M4 subject486 M1 | interventic NR | R  | R  |
| Sample_27 16s_sampl 3R487_M4 3R487_M4 subject487 M1 | interventic R  | R  | R  |
| Sample_27 16s_sampl 3R488_M4 3R488_M4 subject488 M1 | interventic R  | R  | NR |
| Sample_27 16s_sampl 3R492_M4 3R492_M4 subject492 M1 | interventic NR | R  | NR |
| Sample_27 16s_sampl 3R493_M4 3R493_M4 subject493 M1 | interventic NR | R  | R  |
| Sample_27 16s_sampl 3R495_M4 3R495_M4 subject495 M1 | interventic NR | R  | NR |
| Sample_27 16s_sampl 3R496_M4 3R496_M4 subject496 M1 | interventic NR | NR | NR |
| Sample_27 16s_sampl 3R506_M4 3R506_M4 subject506 M1 | interventic NR | NR | NR |
| Sample_28 16s_sampl 3R512_M4 3R512_M4 subject512 M1 | interventic NR | NR | R  |
| Sample_28 16s_sampl 863_M3_L 863_M3_L subject863 M1 | interventic NR | R  | R  |
| Sample_28 16s_sampl P10_M4_p P10_M4_p subject10 M1  | interventic R  | R  | R  |
| Sample_28 16s_sampl P115_M3_ P115_M3_ subjectP11 M1 | interventic NR | R  | R  |
| Sample_28 16s_sampl P11_M4_p P11_M4_p subject11 M1  | interventic NR | NR | R  |
| Sample_28 16s_sampl P121_M3_ P121_M3_ subjectP12 M1 | interventic NR | R  | NR |
| Sample_28 16s_sampl P125_M3_ P125_M3_ subjectP12 M1 | interventic NR | R  | R  |
| Sample_28 16s_sampl P127_M3_ P127_M3_ subjectP12 M1 | interventic NR | R  | R  |
| Sample_28 16s_sampl P129_M3_ P129_M3_ subjectP12 M1 | interventic NR | R  | R  |
| Sample_28 16s_sampl P13_M5_p P13_M5_p subjectP13 M1 | interventic NR | NR | R  |
| Sample_29 16s_sampl P134_M1_ P134_M1_ subject13 M1  | interventic NR | R  | R  |
| Sample_29 16s_sampl P140_M3_ P140_M3_ subjectP14 M1 | interventic NR | NR | NR |
| Sample_29 16s_sampl P143_M3_ P143_M3_ subjectP14 M1 | interventic R  | R  | R  |
| Sample_29 16s_sampl P145_M3_ P145_M3_ subjectP14 M1 | interventic R  | R  | R  |
| Sample_29 16s_sampl P147_M3_ P147_M3_ subjectP14 M1 | interventic R  | R  | NR |
| Sample_29 16s_sampl P149_M3_ P149_M3_ subjectP14 M1 | interventic NR | R  | R  |
| Sample_29 16s_sampl P150_M3_ P150_M3_ subjectP15 M1 | interventic R  | NR | NR |
| Sample_29 16s_sampl P16_M4_p P16_M4_p subject16 M1  | interventic NR | R  | R  |
| Sample_29 16s_sampl P18_M4_p P18_M4_p subject18 M1  | interventic NR | NR | NR |
| Sample_29 16s_sampl P19_M4_p P19_M4_p subject19 M1  | interventic NR | NR | R  |
| Sample_30 16s_sampl P1_M4_ph P1_M4_ph subject1 M1   | interventic NR | NR | NR |
| Sample_30 16s_sampl P2_M4_ph P2_M4_ph subject2 M1   | interventic R  | R  | R  |
| Sample_30 16s_sampl P6_M4_ph P6_M4_ph subject6 M1   | interventic NR | R  | R  |
| Sample_30 16s_sampl P7_M4_ph P7_M4_ph subject7 M1   | interventic R  | R  | R  |
| Sample_30 16s_sampl 3R443_M5 3R443_M5 subject443 M2 | interventic NR | R  | NR |
| Sample_30 16s_sampl 3R474_M5 3R474_M5 subject474 M2 | interventic NR | R  | NR |

|                                                    |                |    |    |
|----------------------------------------------------|----------------|----|----|
| Sample_3C16s_sampl 3R478_M5 3R478_M5 subject478 M2 | interventic NR | NR | R  |
| Sample_3C16s_sampl 3R479_M5 3R479_M5 subject479 M2 | interventic NR | NR | R  |
| Sample_3C16s_sampl 3R481_M5 3R481_M5 subject481 M2 | interventic NR | NR | R  |
| Sample_3C16s_sampl 3R482_M5 3R482_M5 subject482 M2 | interventic NR | NR | NR |
| Sample_3116s_sampl 3R486_M5 3R486_M5 subject486 M2 | interventic NR | R  | R  |
| Sample_3116s_sampl 3R487_M5 3R487_M5 subject487 M2 | interventic R  | R  | R  |
| Sample_3116s_sampl 3R488_M5 3R488_M5 subject488 M2 | interventic R  | R  | NR |
| Sample_3116s_sampl 3R492_M5 3R492_M5 subject492 M2 | interventic NR | R  | NR |
| Sample_3116s_sampl 3R493_M5 3R493_M5 subject493 M2 | interventic NR | R  | R  |
| Sample_3116s_sampl 3R495_M5 3R495_M5 subject495 M2 | interventic NR | R  | NR |
| Sample_3116s_sampl 3R496_M5 3R496_M5 subject496 M2 | interventic NR | NR | NR |
| Sample_3116s_sampl 3R506_M5 3R506_M5 subject506 M2 | interventic NR | NR | NR |
| Sample_3116s_sampl 3R512_M5 3R512_M5 subject512 M2 | interventic NR | NR | R  |
| Sample_3116s_sampl 863_M2_L 863_M2_L subject863 M2 | interventic NR | R  | R  |
| Sample_3216s_sampl P10_M5_p P10_M5_p subject10 M2  | interventic R  | R  | R  |
| Sample_3216s_sampl P115_M2_ P115_M2_ subjectP11 M2 | interventic NR | R  | R  |
| Sample_3216s_sampl P11_M5_p P11_M5_p subject11 M2  | interventic NR | NR | R  |
| Sample_3216s_sampl P121_M2_ P121_M2_ subjectP12 M2 | interventic NR | R  | NR |
| Sample_3216s_sampl P125_M2_ P125_M2_ subjectP12 M2 | interventic NR | R  | R  |
| Sample_3216s_sampl P127_M2_ P127_M2_ subjectP12 M2 | interventic NR | R  | R  |
| Sample_3216s_sampl P129_M2_ P129_M2_ subjectP12 M2 | interventic NR | R  | R  |
| Sample_3216s_sampl P13_M4_p P13_M4_p subjectP13 M2 | interventic NR | NR | R  |
| Sample_3216s_sampl P134_M2_ P134_M2_ subject13 M2  | interventic NR | R  | R  |
| Sample_3216s_sampl P140_M2_ P140_M2_ subjectP14 M2 | interventic NR | NR | NR |
| Sample_3316s_sampl P143_M2_ P143_M2_ subjectP14 M2 | interventic R  | R  | R  |
| Sample_3316s_sampl P145_M2_ P145_M2_ subjectP14 M2 | interventic R  | R  | R  |
| Sample_3316s_sampl P147_M2_ P147_M2_ subjectP14 M2 | interventic R  | R  | NR |
| Sample_3316s_sampl P149_M2_ P149_M2_ subjectP14 M2 | interventic NR | R  | R  |
| Sample_3316s_sampl P150_M2_ P150_M2_ subjectP15 M2 | interventic R  | NR | NR |
| Sample_3316s_sampl P16_M5_p P16_M5_p subject16 M2  | interventic NR | R  | R  |
| Sample_3316s_sampl P18_M5_p P18_M5_p subject18 M2  | interventic NR | NR | NR |
| Sample_3316s_sampl P19_M5_p P19_M5_p subject19 M2  | interventic NR | NR | R  |
| Sample_3316s_sampl P1_M5_ph P1_M5_ph subject1 M2   | interventic NR | NR | NR |
| Sample_3316s_sampl P2_M5_ph P2_M5_ph subject2 M2   | interventic R  | R  | R  |
| Sample_3416s_sampl P6_M5_ph P6_M5_ph subject6 M2   | interventic NR | R  | R  |
| Sample_3416s_sampl P7_M5_ph P7_M5_ph subject7 M2   | interventic R  | R  | R  |
| Sample_3416s_sampl 3R443_M6 3R443_M6 subject443 M3 | interventic NR | R  | NR |
| Sample_3416s_sampl 3R474_M6 3R474_M6 subject474 M3 | interventic NR | R  | NR |
| Sample_3416s_sampl 3R478_M6 3R478_M6 subject478 M3 | interventic NR | NR | R  |
| Sample_3416s_sampl 3R479_M6 3R479_M6 subject479 M3 | interventic NR | NR | R  |
| Sample_3416s_sampl 3R481_M6 3R481_M6 subject481 M3 | interventic NR | NR | R  |
| Sample_3416s_sampl 3R482_M6 3R482_M6 subject482 M3 | interventic NR | NR | NR |
| Sample_3416s_sampl 3R486_M6 3R486_M6 subject486 M3 | interventic NR | R  | R  |
| Sample_3416s_sampl 3R487_M6 3R487_M6 subject487 M3 | interventic R  | R  | R  |
| Sample_3516s_sampl 3R488_M6 3R488_M6 subject488 M3 | interventic R  | R  | NR |
| Sample_3516s_sampl 3R492_M6 3R492_M6 subject492 M3 | interventic NR | R  | NR |
| Sample_3516s_sampl 3R493_M6 3R493_M6 subject493 M3 | interventic NR | R  | R  |
| Sample_3516s_sampl 3R495_M6 3R495_M6 subject495 M3 | interventic NR | R  | NR |
| Sample_3516s_sampl 3R496_M6 3R496_M6 subject496 M3 | interventic NR | NR | NR |
| Sample_3516s_sampl 3R506_M6 3R506_M6 subject506 M3 | interventic NR | NR | NR |
| Sample_3516s_sampl 3R512_M6 3R512_M6 subject512 M3 | interventic NR | NR | R  |

|                                                    |                |    |    |
|----------------------------------------------------|----------------|----|----|
| Sample_3516s_sampl 863_M4_L 863_M4_L subject863 M3 | interventic NR | R  | R  |
| Sample_3516s_sampl P10_M6_p P10_M6_p subject10 M3  | interventic R  | R  | R  |
| Sample_3516s_sampl P115_M4_ P115_M4_ subjectP11 M3 | interventic NR | R  | R  |
| Sample_3616s_sampl P121_M4_ P121_M4_ subjectP12 M3 | interventic NR | R  | NR |
| Sample_3616s_sampl P125_M4_ P125_M4_ subjectP12 M3 | interventic NR | R  | R  |
| Sample_3616s_sampl P127_M4_ P127_M4_ subjectP12 M3 | interventic NR | R  | R  |
| Sample_3616s_sampl P129_M4_ P129_M4_ subjectP12 M3 | interventic NR | R  | R  |
| Sample_3616s_sampl P13_M6_p P13_M6_p subjectP13 M3 | interventic NR | NR | R  |
| Sample_3616s_sampl P134_M3_ P134_M3_ subject13 M3  | interventic NR | R  | R  |
| Sample_3616s_sampl P140_M4_ P140_M4_ subjectP14 M3 | interventic NR | NR | NR |
| Sample_3616s_sampl P143_M4_ P143_M4_ subjectP14 M3 | interventic R  | R  | R  |
| Sample_3616s_sampl P145_M4_ P145_M4_ subjectP14 M3 | interventic R  | R  | R  |
| Sample_3616s_sampl P147_M4_ P147_M4_ subjectP14 M3 | interventic R  | R  | NR |
| Sample_3716s_sampl P149_M4_ P149_M4_ subjectP14 M3 | interventic NR | R  | R  |
| Sample_3716s_sampl P150_M4_ P150_M4_ subjectP15 M3 | interventic R  | NR | NR |
| Sample_3716s_sampl P16_M6_p P16_M6_p subject16 M3  | interventic NR | R  | R  |
| Sample_3716s_sampl P18_M6_p P18_M6_p subject18 M3  | interventic NR | NR | NR |
| Sample_3716s_sampl P19_M6_p P19_M6_p subject19 M3  | interventic NR | NR | R  |
| Sample_3716s_sampl P1_M6_ph P1_M6_ph subject1 M3   | interventic NR | NR | NR |
| Sample_3716s_sampl P2_M6_ph P2_M6_ph subject2 M3   | interventic R  | R  | R  |
| Sample_3716s_sampl P6_M6_ph P6_M6_ph subject6 M3   | interventic NR | R  | R  |
| Sample_3716s_sampl P7_M6_ph P7_M6_ph subject7 M3   | interventic R  | R  | R  |
| Sample_3716s_sampl 3R443_M7 3R443_M7 subject443 M4 | interventic NR | R  | NR |
| Sample_3816s_sampl 3R474_M7 3R474_M7 subject474 M4 | interventic NR | R  | NR |
| Sample_3816s_sampl 3R478_M7 3R478_M7 subject478 M4 | interventic NR | NR | R  |
| Sample_3816s_sampl 3R479_M7 3R479_M7 subject479 M4 | interventic NR | NR | R  |
| Sample_3816s_sampl 3R481_M7 3R481_M7 subject481 M4 | interventic NR | NR | R  |
| Sample_3816s_sampl 3R482_M7 3R482_M7 subject482 M4 | interventic NR | NR | NR |
| Sample_3816s_sampl 3R486_M7 3R486_M7 subject486 M4 | interventic NR | R  | R  |
| Sample_3816s_sampl 3R487_M7 3R487_M7 subject487 M4 | interventic R  | R  | R  |
| Sample_3816s_sampl 3R492_M7 3R492_M7 subject492 M4 | interventic NR | R  | NR |
| Sample_3816s_sampl 3R493_M7 3R493_M7 subject493 M4 | interventic NR | R  | R  |
| Sample_3816s_sampl 3R495_M7 3R495_M7 subject495 M4 | interventic NR | R  | NR |
| Sample_3916s_sampl 3R496_M7 3R496_M7 subject496 M4 | interventic NR | NR | NR |
| Sample_3916s_sampl 3R506_M7 3R506_M7 subject506 M4 | interventic NR | NR | NR |
| Sample_3916s_sampl 3R512_M7 3R512_M7 subject512 M4 | interventic NR | NR | R  |
| Sample_3916s_sampl P10_M7_p P10_M7_p subject10 M4  | interventic R  | R  | R  |
| Sample_3916s_sampl P134_M4_ P134_M4_ subject13 M4  | interventic NR | R  | R  |
| Sample_3916s_sampl P16_M7_p P16_M7_p subject16 M4  | interventic NR | R  | R  |
| Sample_3916s_sampl P18_M7_p P18_M7_p subject18 M4  | interventic NR | NR | NR |
| Sample_3916s_sampl P1_M7_ph P1_M7_ph subject1 M4   | interventic NR | NR | NR |
| Sample_3916s_sampl P2_M7_ph P2_M7_ph subject2 M4   | interventic R  | R  | R  |
| Sample_3916s_sampl P6_M7_ph P6_M7_ph subject6 M4   | interventic NR | R  | R  |
| Sample_4016s_sampl P7_M7_ph P7_M7_ph subject7 M4   | interventic R  | R  | R  |
| Sample_4016s_sampl 3R474_M8 3R474_M8 subject474 M5 | interventic NR | R  | NR |
| Sample_4016s_sampl 3R478_M8 3R478_M8 subject478 M5 | interventic NR | NR | R  |
| Sample_4016s_sampl 3R479_M8 3R479_M8 subject479 M5 | interventic NR | NR | R  |
| Sample_4016s_sampl 3R481_M8 3R481_M8 subject481 M5 | interventic NR | NR | R  |
| Sample_4016s_sampl 3R482_M8 3R482_M8 subject482 M5 | interventic NR | NR | NR |
| Sample_4016s_sampl 3R487_M8 3R487_M8 subject487 M5 | interventic R  | R  | R  |
| Sample_4016s_sampl 3R488_M8 3R488_M8 subject488 M5 | interventic R  | R  | NR |

|                                                    |                |    |    |
|----------------------------------------------------|----------------|----|----|
| Sample_4C16s_sampl 3R495_M8 3R495_M8 subject495 M5 | interventic NR | R  | NR |
| Sample_4C16s_sampl 3R496_M8 3R496_M8 subject496 M5 | interventic NR | NR | NR |
| Sample_4116s_sampl 3R506_M8 3R506_M8 subject506 M5 | interventic NR | NR | NR |
| Sample_4116s_sampl 3R512_M8 3R512_M8 subject512 M5 | interventic NR | NR | R  |
| Sample_4116s_sampl P10_M8_p P10_M8_p subject10 M5  | interventic R  | R  | R  |
| Sample_4116s_sampl P16_M8_p P16_M8_p subject16 M5  | interventic NR | R  | R  |
| Sample_4116s_sampl P18_M8_p P18_M8_p subject18 M5  | interventic NR | NR | NR |
| Sample_4116s_sampl P19_M8_p P19_M8_p subject19 M5  | interventic NR | NR | R  |
| Sample_4116s_sampl P2_M8_ph P2_M8_ph subject2 M5   | interventic R  | R  | R  |
| Sample_4116s_sampl P6_M8_ph P6_M8_ph subject6 M5   | interventic NR | R  | R  |
| Sample_4116s_sampl P7_M8_ph P7_M8_ph subject7 M5   | interventic R  | R  | R  |
